# Supplementary material
Source: publisher site journal article supplement (https://www.dovepress.com/get_supplementary_file.php?f=178151-Table-S2.xlsx)
Supplement: Supplementary file 1 [file get_supplementary_file.php]

## Sheet: Slide lists
Table S2 Differential expression of genes in MGC-803 cells in total gene expression chip of homo-sapiens
	Sample	Sample_Label	Chip_Barcode	Chip_Label
	A5553_(PrimeView).CEL	MGC-803-MIR-593-5P
	A5552_(PrimeView).CEL	MGC-803-NC

## Sheet: Normalized_Data
Probe	NC	MIR-593-5P	Fold change	Fold change	Fold change	Fold change	Annotation	Annotation	Annotation	Annotation	Annotation	Annotation
probeSet	A5552_(PrimeView).CEL	A5553_(PrimeView).CEL	Fold change	Log Fold change	Absolute Fold change	Regulation	Gene Symbol	Entrez Gene	Gene Ontology Biological Process	Gene Ontology Cellular Component	Gene Ontology Molecular Function	Alignments
11764191_at	-0.040514	0.040514	1.05777	0.081028	1.05777	up						chr17:62342072-62343073 (+) // 99.8 // q23.3
11727050_a_at	-0.0641923	0.0641918	1.09307	0.128384	1.09307	up	PPP6C	5537	0000082 // G1/S transition of mitotic cell cycle // traceable author statement /// 0006470 // protein dephosphorylation // inferred from direct assay /// 0006470 // protein dephosphorylation // inferred from electronic annotation /// 0006470 // protein dephosphorylation // traceable author statement /// 0007049 // cell cycle // inferred from electronic annotation	0005737 // cytoplasm // inferred from electronic annotation /// 0005829 // cytosol // inferred from direct assay	0004721 // phosphoprotein phosphatase activity // inferred from electronic annotation /// 0004722 // protein serine/threonine phosphatase activity // inferred from direct assay /// 0004722 // protein serine/threonine phosphatase activity // inferred from electronic annotation /// 0004722 // protein serine/threonine phosphatase activity // traceable author statement /// 0005515 // protein binding …	chr9:127908852-127952218 (-) // 96.0 // q33.3
11750344_a_at	-0.0578299	0.0578303	1.08347	0.11566	1.08347	up	ALOX15	246	0006629 // lipid metabolic process // non-traceable author statement /// 0006691 // leukotriene metabolic process // inferred from electronic annotation /// 0006954 // inflammatory response // traceable author statement /// 0019370 // leukotriene biosynthetic process // inferred from electronic annotation /// 0055114 // oxidation-reduction process // inferred from electronic annotation	0005634 // nucleus // inferred from direct assay /// 0005730 // nucleolus // inferred from direct assay /// 0005737 // cytoplasm // inferred from direct assay /// 0005737 // cytoplasm // inferred from electronic annotation	0005506 // iron ion binding // inferred from electronic annotation /// 0016165 // lipoxygenase activity // inferred from electronic annotation /// 0016165 // lipoxygenase activity // traceable author statement /// 0016491 // oxidoreductase activity // inferred from electronic annotation /// 0016702 // oxidoreductase activity, acting on single donors with incorporation of molecular oxygen, incorpo…	chr17:4534590-4545230 (-) // 97.77 // p13.2
11759307_at	-0.274188	0.274187	1.46244	0.548375	1.46244	up	RREB1	6239	0006351 // transcription, DNA-dependent // inferred from electronic annotation /// 0006355 // regulation of transcription, DNA-dependent // traceable author statement /// 0006355 // regulation of transcription, DNA-dependent // inferred from electronic annotation /// 0006366 // transcription from RNA polymerase II promoter // traceable author statement /// 0007265 // Ras protein signal transducti…	0005622 // intracellular // inferred from electronic annotation /// 0005634 // nucleus // traceable author statement /// 0005634 // nucleus // inferred from electronic annotation /// 0005737 // cytoplasm // traceable author statement /// 0016604 // nuclear body // traceable author statement /// 0016607 // nuclear speck // inferred from electronic annotation	0003676 // nucleic acid binding // inferred from electronic annotation /// 0003677 // DNA binding // inferred from electronic annotation /// 0008270 // zinc ion binding // inferred from electronic annotation /// 0046872 // metal ion binding // inferred from electronic annotation	chr6:7108053-7252213 (+) // 95.0 // p24.3
11761403_at	0.0847361	-0.0847364	-1.12465	-0.169472	1.12465	down	ISCU	23479	0009399 // nitrogen fixation // traceable author statement /// 0016226 // iron-sulfur cluster assembly // traceable author statement /// 0016226 // iron-sulfur cluster assembly // inferred from electronic annotation	0005634 // nucleus // traceable author statement /// 0005634 // nucleus // inferred from electronic annotation /// 0005737 // cytoplasm // inferred from direct assay /// 0005737 // cytoplasm // inferred from electronic annotation /// 0005739 // mitochondrion // inferred from direct assay /// 0005739 // mitochondrion // inferred from electronic annotation /// 0005829 // cytosol // inferred from di…	0005506 // iron ion binding // traceable author statement /// 0005506 // iron ion binding // inferred from electronic annotation /// 0005515 // protein binding // inferred from physical interaction /// 0032947 // protein complex scaffold // inferred from direct assay /// 0046872 // metal ion binding // inferred from electronic annotation /// 0051536 // iron-sulfur cluster binding // inferred from…	chr12:108956373-108961684 (+) // 80.72 // q23.3
11757172_at	0.0790215	-0.0790215	-1.11577	-0.158043	1.11577	down	SNORA47	677828				chr5:76376258-76376396 (-) // 100.0 // q13.3
11763268_at	0.148595	-0.148595	-1.22875	-0.29719	1.22875	down	FAM120B	84498	0006351 // transcription, DNA-dependent // inferred from electronic annotation /// 0006355 // regulation of transcription, DNA-dependent // inferred from electronic annotation /// 0030154 // cell differentiation // inferred from electronic annotation	0005634 // nucleus // inferred from electronic annotation		chr6:170599790-170716404 (+) // 88.48 // q27
11727695_a_at	0.138632	-0.138632	-1.21189	-0.277264	1.21189	down	KLRC4-KLRK1 /// KLRK1	100528032 /// 22914	0002223 // stimulatory C-type lectin receptor signaling pathway // inferred from electronic annotation /// 0007165 // signal transduction // traceable author statement /// 0030101 // natural killer cell activation // inferred from electronic annotation /// 0030101 // natural killer cell activation // traceable author statement /// 0031295 // T cell costimulation // traceable author statement /// …	0005886 // plasma membrane // traceable author statement /// 0005887 // integral to plasma membrane // traceable author statement /// 0009897 // external side of plasma membrane // inferred from electronic annotation /// 0009986 // cell surface // inferred from electronic annotation /// 0016020 // membrane // inferred from electronic annotation /// 0016021 // integral to membrane // traceable aut…	0004872 // receptor activity // traceable author statement /// 0004872 // receptor activity // inferred from electronic annotation /// 0005515 // protein binding // inferred from physical interaction /// 0030246 // carbohydrate binding // inferred from electronic annotation /// 0032394 // MHC class Ib receptor activity // inferred from electronic annotation /// 0042288 // MHC class I protein bind…	chr12:10524951-10542640 (-) // 54.21 // p13.2
11730840_a_at	-0.126366	0.126367	1.19146	0.252733	1.19146	up	ZMYND8	23613	0000122 // negative regulation of transcription from RNA polymerase II promoter // inferred from sequence or structural similarity /// 0016310 // phosphorylation // inferred from electronic annotation	0005634 // nucleus // inferred from sequence or structural similarity	0001106 // RNA polymerase II transcription corepressor activity // inferred from sequence or structural similarity /// 0005515 // protein binding // inferred from physical interaction /// 0008270 // zinc ion binding // inferred from electronic annotation /// 0016301 // kinase activity // inferred from electronic annotation /// 0046872 // metal ion binding // inferred from electronic annotation //…	chr20:45837858-45985474 (-) // 98.92 // q13.12
11755175_a_at	0.0315862	-0.0315862	-1.04476	-0.0631723	1.04476	down	HSPA12A	259217	0006950 // response to stress // inferred from electronic annotation		0000166 // nucleotide binding // inferred from electronic annotation /// 0005524 // ATP binding // inferred from electronic annotation	chr10:118430703-118609716 (-) // 94.89 // q25.3
11731820_at	-0.0847955	0.0847955	1.12474	0.169591	1.12474	up	ADAM11	4185	0006508 // proteolysis // inferred from electronic annotation /// 0007229 // integrin-mediated signaling pathway // traceable author statement /// 0007229 // integrin-mediated signaling pathway // inferred from electronic annotation	0005886 // plasma membrane // traceable author statement /// 0016020 // membrane // inferred from electronic annotation /// 0016021 // integral to membrane // inferred from electronic annotation /// 0031012 // extracellular matrix // inferred from sequence or structural similarity	0004222 // metalloendopeptidase activity // inferred from electronic annotation /// 0005178 // integrin binding // traceable author statement /// 0008237 // metallopeptidase activity // traceable author statement /// 0008270 // zinc ion binding // inferred from electronic annotation	chr17:42836398-42859214 (+) // 96.66 // q21.31
11731123_a_at	0.11059	-0.11059	-1.16569	-0.22118	1.16569	down	TMEM200A	114801		0016020 // membrane // inferred from electronic annotation /// 0016021 // integral to membrane // inferred from electronic annotation		chr6:130758261-130764212 (+) // 93.26 // q23.1
11761012_x_at	0.033669	-0.0336695	-1.04778	-0.0673385	1.04778	down	POM121L8P	29797				chr20:23969351-23971719 (+) // 91.03 // p11.21 /// chr22:21636713-21639084 (+) // 93.78 // q11.21 /// chr22:18833988-18836359 (+) // 93.41 // q11.21 /// chr22:24647516-24649886 (+) // 92.32 // q11.23 /// chr22:21043862-21046233 (+) // 91.36 // q11.21 /// chr22:21480010-21482381 (-) // 93.66 // q11.21 /// chr22:22984642-22987012 (-) // 92.36 // q11.22 /// chr22:25052816-25055186 (-) // 92.32 // q1…
11763593_a_at	0.0610585	-0.0610583	-1.08833	-0.122117	1.08833	down	RGNEF	64283	0021955 // central nervous system neuron axonogenesis // inferred from electronic annotation /// 0030154 // cell differentiation // inferred from electronic annotation /// 0035023 // regulation of Rho protein signal transduction // inferred from electronic annotation /// 0035556 // intracellular signal transduction // inferred from electronic annotation /// 0060052 // neurofilament cytoskeleton o…	0005622 // intracellular // inferred from electronic annotation /// 0005737 // cytoplasm // inferred from direct assay /// 0005737 // cytoplasm // inferred from electronic annotation /// 0005886 // plasma membrane // inferred from electronic annotation /// 0015630 // microtubule cytoskeleton // inferred from direct assay /// 0016020 // membrane // inferred from electronic annotation	0003723 // RNA binding // inferred from electronic annotation /// 0005085 // guanyl-nucleotide exchange factor activity // inferred from electronic annotation /// 0005089 // Rho guanyl-nucleotide exchange factor activity // inferred from electronic annotation /// 0005543 // phospholipid binding // inferred from electronic annotation /// 0046872 // metal ion binding // inferred from electronic ann…	chr5:73181727-73237817 (+) // 99.22 // q13.2
11730317_at	0.122456	-0.122456	-1.18502	-0.244911	1.18502	down	RGS7BP	401190	0007186 // G-protein coupled receptor signaling pathway // inferred from electronic annotation /// 0009968 // negative regulation of signal transduction // inferred from electronic annotation	0005634 // nucleus // inferred from electronic annotation /// 0005737 // cytoplasm // inferred from electronic annotation /// 0005886 // plasma membrane // inferred from electronic annotation /// 0016020 // membrane // inferred from electronic annotation		chr5:63801773-63908145 (+) // 89.65 // q12.3
11743747_a_at	-0.16122	0.16122	1.25044	0.322439	1.25044	up	PHKA1	5255	0005975 // carbohydrate metabolic process // traceable author statement /// 0005975 // carbohydrate metabolic process // inferred from electronic annotation /// 0005976 // polysaccharide metabolic process // inferred from electronic annotation /// 0005977 // glycogen metabolic process // traceable author statement /// 0005977 // glycogen metabolic process // inferred from electronic annotation //…	0005829 // cytosol // traceable author statement /// 0005886 // plasma membrane // inferred from electronic annotation /// 0005964 // phosphorylase kinase complex // inferred from electronic annotation /// 0016020 // membrane // inferred from electronic annotation	0003824 // catalytic activity // inferred from electronic annotation /// 0004553 // hydrolase activity, hydrolyzing O-glycosyl compounds // inferred from electronic annotation /// 0004689 // phosphorylase kinase activity // inferred from electronic annotation /// 0004689 // phosphorylase kinase activity // traceable author statement /// 0005516 // calmodulin binding // inferred from electronic an…	chrX:71798663-71934043 (-) // 98.84 // q13.1
11716432_a_at	0.0257998	-0.0257998	-1.03641	-0.0515995	1.03641	down	MNAT1	4331	0000079 // regulation of cyclin-dependent protein kinase activity // traceable author statement /// 0000080 // G1 phase of mitotic cell cycle // traceable author statement /// 0000082 // G1/S transition of mitotic cell cycle // traceable author statement /// 0000082 // G1/S transition of mitotic cell cycle // inferred from electronic annotation /// 0000084 // S phase of mitotic cell cycle // trac…	0005634 // nucleus // inferred from direct assay /// 0005634 // nucleus // inferred from electronic annotation /// 0005654 // nucleoplasm // traceable author statement /// 0005675 // holo TFIIH complex // inferred from direct assay /// 0005737 // cytoplasm // inferred from direct assay /// 0043231 // intracellular membrane-bounded organelle // inferred from direct assay	0004672 // protein kinase activity // inferred from direct assay /// 0005515 // protein binding // inferred from physical interaction /// 0008094 // DNA-dependent ATPase activity // inferred from direct assay /// 0008270 // zinc ion binding // inferred from electronic annotation /// 0008270 // zinc ion binding // traceable author statement /// 0008353 // RNA polymerase II carboxy-terminal domain …	chr14:61201458-61435480 (+) // 94.24 // q23.1
11734196_a_at	-0.0605082	0.0605087	1.0875	0.121017	1.0875	up	SAMD4B	55095				chr19:39842454-39875535 (+) // 90.83 // q13.2
11736790_x_at	0.0334256	-0.0334258	-1.04743	-0.0668514	1.04743	down	FBXO4	26272	0000209 // protein polyubiquitination // inferred from direct assay /// 0000723 // telomere maintenance // inferred from mutant phenotype /// 0006511 // ubiquitin-dependent protein catabolic process // inferred from direct assay /// 0016567 // protein ubiquitination // inferred from direct assay /// 0016567 // protein ubiquitination // inferred from electronic annotation /// 0031146 // SCF-depend…	0000151 // ubiquitin ligase complex // inferred from direct assay /// 0005737 // cytoplasm // inferred from electronic annotation /// 0019005 // SCF ubiquitin ligase complex // inferred from direct assay	0004842 // ubiquitin-protein ligase activity // inferred from direct assay /// 0005515 // protein binding // inferred from physical interaction /// 0042803 // protein homodimerization activity // inferred from physical interaction	chr5:41925355-41935423 (+) // 83.91 // p13.1
11745745_a_at	-0.0609941	0.0609941	1.08823	0.121988	1.08823	up	SLC39A1	27173	0006810 // transport // inferred from electronic annotation /// 0006811 // ion transport // inferred from electronic annotation /// 0006812 // cation transport // traceable author statement /// 0006829 // zinc ion transport // inferred from electronic annotation /// 0030001 // metal ion transport // inferred from electronic annotation /// 0055085 // transmembrane transport // traceable author sta…	0005624 // membrane fraction // traceable author statement /// 0005783 // endoplasmic reticulum // inferred from electronic annotation /// 0005789 // endoplasmic reticulum membrane // inferred from electronic annotation /// 0005886 // plasma membrane // inferred from direct assay /// 0005886 // plasma membrane // traceable author statement /// 0005886 // plasma membrane // inferred from electroni…	0005102 // receptor binding // inferred from electronic annotation /// 0005385 // zinc ion transmembrane transporter activity // inferred from electronic annotation /// 0022890 // inorganic cation transmembrane transporter activity // traceable author statement /// 0046873 // metal ion transmembrane transporter activity // inferred from electronic annotation	chr1:153931651-153940097 (-) // 92.53 // q21.3
11716949_s_at	0.0485892	-0.0485897	-1.06968	-0.0971789	1.06968	down	TM9SF3	56889		0016020 // membrane // inferred from electronic annotation /// 0016021 // integral to membrane // inferred from electronic annotation	0005488 // binding // inferred from direct assay	chr10:98277867-98346797 (-) // 96.48 // q24.1
11715860_a_at	0.155706	-0.155705	-1.24092	-0.311411	1.24092	down	RIC8A	60626	0001701 // in utero embryonic development // inferred from electronic annotation /// 0008542 // visual learning // inferred from electronic annotation /// 0009416 // response to light stimulus // inferred from electronic annotation /// 0043547 // positive regulation of GTPase activity // inferred from electronic annotation	0005737 // cytoplasm // inferred from sequence or structural similarity /// 0005737 // cytoplasm // inferred from electronic annotation /// 0005886 // plasma membrane // inferred from sequence or structural similarity /// 0005886 // plasma membrane // inferred from electronic annotation /// 0016020 // membrane // inferred from electronic annotation	0001965 // G-protein alpha-subunit binding // inferred from electronic annotation /// 0005085 // guanyl-nucleotide exchange factor activity // inferred from electronic annotation /// 0005096 // GTPase activator activity // inferred from electronic annotation	chr11:207118-215113 (+) // 82.86 // p15.5
11753470_a_at	0	0	-1	0	1	down	TIA1	7072	0006915 // apoptotic process // inferred from electronic annotation /// 0006917 // induction of apoptosis // traceable author statement /// 0017148 // negative regulation of translation // inferred from electronic annotation /// 0042036 // negative regulation of cytokine biosynthetic process // inferred from electronic annotation /// 0048024 // regulation of nuclear mRNA splicing, via spliceosome…	0005634 // nucleus // inferred from electronic annotation /// 0005737 // cytoplasm // inferred from electronic annotation	0000166 // nucleotide binding // inferred from electronic annotation /// 0003676 // nucleic acid binding // inferred from electronic annotation /// 0003723 // RNA binding // inferred from electronic annotation /// 0005515 // protein binding // inferred from physical interaction /// 0008143 // poly(A) RNA binding // traceable author statement /// 0017091 // AU-rich element binding // inferred from…	chr2:70443805-70475586 (-) // 95.68 // p13.3
11737412_at	-0.0715497	0.0715494	1.10427	0.143099	1.10427	up	SCML4	256380	0006351 // transcription, DNA-dependent // inferred from electronic annotation /// 0006355 // regulation of transcription, DNA-dependent // inferred from electronic annotation	0005634 // nucleus // inferred from electronic annotation	0003677 // DNA binding // inferred from electronic annotation	chr6:108023360-108145521 (-) // 84.48 // q21
11733237_a_at	-0.0615678	0.0615678	1.0891	0.123136	1.0891	up	RPGRIP1L	23322	0001701 // in utero embryonic development // inferred from electronic annotation /// 0001822 // kidney development // inferred from electronic annotation /// 0001889 // liver development // inferred from electronic annotation /// 0007368 // determination of left/right symmetry // inferred from electronic annotation /// 0007420 // brain development // inferred from electronic annotation /// 000858…	0005737 // cytoplasm // inferred from direct assay /// 0005737 // cytoplasm // inferred from electronic annotation /// 0005813 // centrosome // inferred from direct assay /// 0005815 // microtubule organizing center // inferred from electronic annotation /// 0005856 // cytoskeleton // inferred from electronic annotation /// 0005911 // cell-cell junction // inferred from direct assay /// 0005923 /…	0005515 // protein binding // inferred from physical interaction /// 0031870 // thromboxane A2 receptor binding // inferred from physical interaction	chr16:53633817-53737742 (-) // 96.81 // q12.2
11732837_a_at	-0.112321	0.112321	1.16849	0.224643	1.16849	up	IL37	27178	0001960 // negative regulation of cytokine-mediated signaling pathway // inferred from electronic annotation /// 0006955 // immune response // non-traceable author statement	0005576 // extracellular region // non-traceable author statement /// 0005576 // extracellular region // traceable author statement /// 0005576 // extracellular region // inferred from electronic annotation /// 0005615 // extracellular space // inferred from electronic annotation /// 0005634 // nucleus // inferred from electronic annotation /// 0005737 // cytoplasm // inferred from electronic ann…	0005125 // cytokine activity // inferred from electronic annotation /// 0005149 // interleukin-1 receptor binding // non-traceable author statement /// 0005149 // interleukin-1 receptor binding // traceable author statement /// 0005152 // interleukin-1 receptor antagonist activity // inferred from electronic annotation	chr2:113670547-113676459 (+) // 95.9 // q13
11747580_a_at	0.0177608	-0.0177603	-1.02493	-0.035521	1.02493	down	PGS1	9489	0006655 // phosphatidylglycerol biosynthetic process // inferred from sequence or structural similarity /// 0006655 // phosphatidylglycerol biosynthetic process // inferred from electronic annotation /// 0008152 // metabolic process // inferred from electronic annotation /// 0008654 // phospholipid biosynthetic process // inferred from electronic annotation /// 0032049 // cardiolipin biosynthetic…	0005739 // mitochondrion // inferred from sequence or structural similarity /// 0005739 // mitochondrion // inferred from electronic annotation /// 0005743 // mitochondrial inner membrane // traceable author statement /// 0005783 // endoplasmic reticulum // inferred from direct assay	0000166 // nucleotide binding // inferred from electronic annotation /// 0003824 // catalytic activity // inferred from electronic annotation /// 0005509 // calcium ion binding // inferred from sequence or structural similarity /// 0005524 // ATP binding // inferred from electronic annotation /// 0008444 // CDP-diacylglycerol-glycerol-3-phosphate 3-phosphatidyltransferase activity // inferred fro…	chr17:76374731-76420637 (+) // 98.17 // q25.3
11744584_a_at	0.102458	-0.102458	-1.15262	-0.204915	1.15262	down	HYI	81888			0008903 // hydroxypyruvate isomerase activity // inferred from electronic annotation /// 0016853 // isomerase activity // inferred from electronic annotation	chr1:43916277-43919346 (-) // 92.28 // p34.2
11720005_at	0.0780811	-0.0780809	-1.11432	-0.156162	1.11432	down	NPTX2	4885	0007268 // synaptic transmission // non-traceable author statement	0005576 // extracellular region // inferred from electronic annotation	0030246 // carbohydrate binding // inferred from electronic annotation /// 0046872 // metal ion binding // inferred from electronic annotation	chr7:98246596-98259181 (+) // 94.95 // q22.1
11731753_a_at	-0.0819078	0.0819078	1.12025	0.163816	1.12025	up	ZNF577	84765	0006351 // transcription, DNA-dependent // inferred from electronic annotation /// 0006355 // regulation of transcription, DNA-dependent // inferred from electronic annotation	0005622 // intracellular // inferred from electronic annotation /// 0005634 // nucleus // inferred from electronic annotation	0003676 // nucleic acid binding // inferred from electronic annotation /// 0003677 // DNA binding // inferred from electronic annotation /// 0008270 // zinc ion binding // inferred from electronic annotation /// 0046872 // metal ion binding // inferred from electronic annotation	chr19:52374552-52391229 (-) // 79.47 // q13.41
11758622_s_at	-0.0595751	0.0595751	1.08609	0.11915	1.08609	up	MXRA7	439921		0016020 // membrane // inferred from electronic annotation /// 0016021 // integral to membrane // inferred from electronic annotation		chr17:74675651-74676010 (-) // 99.72 // q25.1 /// chr2:162196027-162196386 (-) // 99.16 // q24.2
11762600_a_at	-0.0832899	0.0832896	1.12239	0.166579	1.12239	up	SEC31B	25956	0006810 // transport // inferred from electronic annotation /// 0015031 // protein transport // inferred from electronic annotation /// 0016192 // vesicle-mediated transport // inferred from electronic annotation	0005737 // cytoplasm // inferred from electronic annotation /// 0005739 // mitochondrion // inferred from electronic annotation /// 0005783 // endoplasmic reticulum // inferred from electronic annotation /// 0005789 // endoplasmic reticulum membrane // inferred from electronic annotation /// 0012507 // ER to Golgi transport vesicle membrane // inferred from electronic annotation /// 0016020 // me…	0003954 // NADH dehydrogenase activity // inferred from electronic annotation /// 0008137 // NADH dehydrogenase (ubiquinone) activity // inferred from electronic annotation	chr10:102265384-102289628 (-) // 99.9 // q24.31
11736940_at	0.00445414	-0.00445414	-1.00619	-0.00890827	1.00619	down	CHRNB4	1143	0001508 // regulation of action potential // inferred from electronic annotation /// 0006810 // transport // inferred from electronic annotation /// 0006811 // ion transport // traceable author statement /// 0006811 // ion transport // inferred from electronic annotation /// 0006939 // smooth muscle contraction // inferred from electronic annotation /// 0006940 // regulation of smooth muscle cont…	0005886 // plasma membrane // traceable author statement /// 0005886 // plasma membrane // inferred from electronic annotation /// 0005887 // integral to plasma membrane // inferred by curator /// 0005892 // acetylcholine-gated channel complex // inferred from direct assay /// 0005892 // acetylcholine-gated channel complex // traceable author statement /// 0005892 // acetylcholine-gated channel c…	0004872 // receptor activity // inferred from electronic annotation /// 0004889 // acetylcholine-activated cation-selective channel activity // traceable author statement /// 0004889 // acetylcholine-activated cation-selective channel activity // inferred from electronic annotation /// 0005216 // ion channel activity // inferred from electronic annotation /// 0005230 // extracellular ligand-gated…	chr15:78916514-78933587 (-) // 73.27 // q25.1
11741412_at	-0.0413504	0.0413504	1.059	0.0827007	1.059	up	LHX9	56956	0006355 // regulation of transcription, DNA-dependent // inferred from electronic annotation /// 0008045 // motor axon guidance // inferred from sequence or structural similarity /// 0008283 // cell proliferation // inferred from electronic annotation /// 0008584 // male gonad development // inferred from electronic annotation /// 0008585 // female gonad development // inferred from electronic an…	0005634 // nucleus // inferred from electronic annotation	0003677 // DNA binding // inferred from electronic annotation /// 0003700 // sequence-specific DNA binding transcription factor activity // inferred from electronic annotation /// 0003714 // transcription corepressor activity // inferred from sequence or structural similarity /// 0008270 // zinc ion binding // inferred from electronic annotation /// 0043565 // sequence-specific DNA binding // inf…	chr1:197886516-197899273 (+) // 97.89 // q31.3
11753606_x_at	-0.0487118	0.0487118	1.06986	0.0974235	1.06986	up	CDC42	998	0001934 // positive regulation of protein phosphorylation // inferred from electronic annotation /// 0003334 // keratinocyte development // inferred from electronic annotation /// 0006184 // GTP catabolic process // traceable author statement /// 0006184 // GTP catabolic process // inferred from electronic annotation /// 0007030 // Golgi organization // inferred from sequence or structural simila…	0000139 // Golgi membrane // inferred from electronic annotation /// 0000139 // Golgi membrane // inferred from sequence or structural similarity /// 0005622 // intracellular // inferred from electronic annotation /// 0005737 // cytoplasm // inferred from direct assay /// 0005737 // cytoplasm // inferred from electronic annotation /// 0005815 // microtubule organizing center // inferred from elec…	0000166 // nucleotide binding // inferred from electronic annotation /// 0003924 // GTPase activity // inferred from electronic annotation /// 0003924 // GTPase activity // traceable author statement /// 0005515 // protein binding // inferred from physical interaction /// 0005525 // GTP binding // inferred from electronic annotation /// 0019901 // protein kinase binding // inferred from direct as…	chr1:22404971-22418010 (+) // 100.0 // p36.12 /// chr4:22728997-22729573 (-) // 98.96 // p15.2
11761646_at	-0.171119	0.171119	1.26772	0.342237	1.26772	up	SRGAP3	9901	0007165 // signal transduction // inferred from electronic annotation /// 0007264 // small GTPase mediated signal transduction // traceable author statement /// 0043547 // positive regulation of GTPase activity // inferred from electronic annotation /// 0051056 // regulation of small GTPase mediated signal transduction // traceable author statement	0005622 // intracellular // inferred from electronic annotation /// 0005829 // cytosol // traceable author statement	0005096 // GTPase activator activity // inferred from electronic annotation	chr3:9048662-9166601 (-) // 80.34 // p25.3
11718707_a_at	-0.280692	0.280692	1.47568	0.561384	1.47568	up	IGF1R	3480	0006468 // protein phosphorylation // inferred from electronic annotation /// 0006916 // anti-apoptosis // traceable author statement /// 0006955 // immune response // inferred from mutant phenotype /// 0007165 // signal transduction // traceable author statement /// 0007169 // transmembrane receptor protein tyrosine kinase signaling pathway // inferred from electronic annotation /// 0007409 // a…	0005792 // microsome // inferred from direct assay /// 0005886 // plasma membrane // inferred from electronic annotation /// 0005887 // integral to plasma membrane // inferred by curator /// 0005901 // caveola // inferred from electronic annotation /// 0016020 // membrane // inferred from direct assay /// 0016020 // membrane // inferred from electronic annotation /// 0016021 // integral to membra…	0000166 // nucleotide binding // inferred from electronic annotation /// 0004672 // protein kinase activity // inferred from electronic annotation /// 0004713 // protein tyrosine kinase activity // inferred from direct assay /// 0004713 // protein tyrosine kinase activity // inferred from electronic annotation /// 0004714 // transmembrane receptor protein tyrosine kinase activity // inferred from…	chr15:99192272-99507759 (+) // 97.28 // q26.3
11722086_x_at	-0.0523553	0.0523553	1.07528	0.104711	1.07528	up	SEPT1	1731	0007049 // cell cycle // inferred from electronic annotation /// 0051301 // cell division // inferred from electronic annotation	0005737 // cytoplasm // inferred from electronic annotation /// 0005815 // microtubule organizing center // inferred from electronic annotation /// 0005856 // cytoskeleton // inferred from electronic annotation /// 0031105 // septin complex // inferred from electronic annotation	0000166 // nucleotide binding // inferred from electronic annotation /// 0005515 // protein binding // inferred from physical interaction /// 0005525 // GTP binding // inferred from electronic annotation	chr16:30389455-30394171 (-) // 96.24 // p11.2
11742820_s_at	0.0834503	-0.0834503	-1.12264	-0.166901	1.12264	down	OGN	4969	0048662 // negative regulation of smooth muscle cell proliferation // inferred from sequence or structural similarity	0005576 // extracellular region // inferred from electronic annotation /// 0005578 // proteinaceous extracellular matrix // inferred from electronic annotation /// 0005615 // extracellular space // inferred from direct assay /// 0005783 // endoplasmic reticulum // inferred from direct assay /// 0031012 // extracellular matrix // inferred from direct assay	0005515 // protein binding // inferred from physical interaction /// 0008083 // growth factor activity // inferred from electronic annotation	chr9:95146099-95166937 (-) // 99.63 // q22.31
11740952_at	-0.087728	0.087728	1.12932	0.175456	1.12932	up	OTUD7A	161725	0006508 // proteolysis // inferred from electronic annotation	0005634 // nucleus // inferred from electronic annotation /// 0005737 // cytoplasm // inferred from electronic annotation	0003677 // DNA binding // inferred from electronic annotation /// 0008233 // peptidase activity // inferred from electronic annotation /// 0008234 // cysteine-type peptidase activity // inferred from electronic annotation /// 0008270 // zinc ion binding // inferred from electronic annotation /// 0016787 // hydrolase activity // inferred from electronic annotation /// 0046872 // metal ion binding …	chr15:31775328-31947542 (-) // 88.66 // q13.3
11746041_a_at	-0.0225534	0.0225534	1.03176	0.0451069	1.03176	up	TRA2B	6434	0000375 // RNA splicing, via transesterification reactions // traceable author statement /// 0000381 // regulation of alternative nuclear mRNA splicing, via spliceosome // inferred from direct assay /// 0000398 // nuclear mRNA splicing, via spliceosome // inferred from direct assay /// 0006397 // mRNA processing // inferred from electronic annotation /// 0008380 // RNA splicing // inferred from e…	0005634 // nucleus // inferred from direct assay /// 0005634 // nucleus // inferred from electronic annotation	0000166 // nucleotide binding // inferred from electronic annotation /// 0003676 // nucleic acid binding // inferred from electronic annotation /// 0003723 // RNA binding // inferred from electronic annotation /// 0003729 // mRNA binding // inferred from direct assay /// 0005515 // protein binding // inferred from physical interaction	chr3:185634536-185655818 (-) // 94.9 // q27.2
11762973_at	-0.101538	0.101538	1.15115	0.203076	1.15115	up				0005576 // extracellular region // inferred from electronic annotation		chr2:31393687-31394575 (-) // 65.65 // p23.1
11744564_a_at	0.0523829	-0.0523834	-1.07532	-0.104766	1.07532	down	PPWD1	23398	0000398 // nuclear mRNA splicing, via spliceosome // inferred by curator /// 0000413 // protein peptidyl-prolyl isomerization // inferred from electronic annotation /// 0006397 // mRNA processing // inferred from electronic annotation /// 0006457 // protein folding // inferred from electronic annotation /// 0008380 // RNA splicing // inferred from electronic annotation	0005634 // nucleus // inferred from direct assay /// 0005634 // nucleus // inferred from electronic annotation /// 0005681 // spliceosomal complex // inferred from electronic annotation /// 0071013 // catalytic step 2 spliceosome // inferred from direct assay	0003755 // peptidyl-prolyl cis-trans isomerase activity // inferred from electronic annotation /// 0016853 // isomerase activity // inferred from electronic annotation	chr5:64859125-64883376 (+) // 99.43 // q12.3
11759054_at	0.0326076	-0.0326073	-1.04624	-0.0652149	1.04624	down	DEFB126	81623	0006952 // defense response // inferred from electronic annotation /// 0042742 // defense response to bacterium // inferred from electronic annotation	0005576 // extracellular region // inferred from electronic annotation /// 0009986 // cell surface // inferred from electronic annotation /// 0030112 // glycocalyx // inferred from electronic annotation		chr20:123009-126392 (+) // 91.23 // p13
11720104_a_at	-0.0219936	0.0219936	1.03096	0.0439873	1.03096	up	PAK1	5058	0000165 // MAPK cascade // inferred from direct assay /// 0001666 // response to hypoxia // inferred from electronic annotation /// 0006468 // protein phosphorylation // inferred from direct assay /// 0006468 // protein phosphorylation // inferred from electronic annotation /// 0006915 // apoptotic process // inferred from electronic annotation /// 0007411 // axon guidance // traceable author sta…	0001726 // ruffle // inferred from direct assay /// 0005624 // membrane fraction // inferred from electronic annotation /// 0005634 // nucleus // inferred from electronic annotation /// 0005737 // cytoplasm // inferred from direct assay /// 0005737 // cytoplasm // inferred from electronic annotation /// 0005794 // Golgi apparatus // inferred from direct assay /// 0005829 // cytosol // traceable a…	0000166 // nucleotide binding // inferred from electronic annotation /// 0003824 // catalytic activity // inferred from electronic annotation /// 0004672 // protein kinase activity // inferred from direct assay /// 0004672 // protein kinase activity // inferred from electronic annotation /// 0004674 // protein serine/threonine kinase activity // inferred from direct assay /// 0004674 // protein s…	chr11:77032591-77185365 (-) // 85.0 // q13.5
11731540_at	-0.0715494	0.0715494	1.10427	0.143099	1.10427	up	SESTD1	91404	0051925 // regulation of calcium ion transport via voltage-gated calcium channel activity // inferred from mutant phenotype	0034704 // calcium channel complex // inferred from physical interaction	0001786 // phosphatidylserine binding // inferred from direct assay /// 0005515 // protein binding // inferred from physical interaction /// 0005545 // 1-phosphatidylinositol binding // inferred from direct assay /// 0005546 // phosphatidylinositol-4,5-bisphosphate binding // inferred from direct assay /// 0010314 // phosphatidylinositol-5-phosphate binding // inferred from direct assay /// 00312…	chr2:179966420-180129517 (-) // 86.67 // q31.2
11725347_a_at	0.100736	-0.100737	-1.14987	-0.201473	1.14987	down	TFDP1	7027	0000080 // G1 phase of mitotic cell cycle // traceable author statement /// 0000082 // G1/S transition of mitotic cell cycle // traceable author statement /// 0000278 // mitotic cell cycle // traceable author statement /// 0006351 // transcription, DNA-dependent // inferred from electronic annotation /// 0006355 // regulation of transcription, DNA-dependent // inferred from electronic annotation …	0005634 // nucleus // inferred from electronic annotation /// 0005654 // nucleoplasm // traceable author statement /// 0005667 // transcription factor complex // inferred from electronic annotation	0003677 // DNA binding // inferred from electronic annotation /// 0003700 // sequence-specific DNA binding transcription factor activity // inferred from electronic annotation /// 0003700 // sequence-specific DNA binding transcription factor activity // traceable author statement /// 0003713 // transcription coactivator activity // traceable author statement /// 0005515 // protein binding // infe…	chr13:114238987-114295788 (+) // 90.18 // q34
11755375_a_at	0.168371	-0.168371	-1.2629	-0.336741	1.2629	down	DGKH	160851	0007205 // protein kinase C-activating G-protein coupled receptor signaling pathway // inferred from mutant phenotype /// 0007205 // protein kinase C-activating G-protein coupled receptor signaling pathway // inferred from electronic annotation /// 0007596 // blood coagulation // traceable author statement /// 0016310 // phosphorylation // inferred from electronic annotation /// 0030168 // platel…	0005622 // intracellular // inferred from electronic annotation /// 0005634 // nucleus // inferred from direct assay /// 0005737 // cytoplasm // inferred from direct assay /// 0005737 // cytoplasm // inferred from electronic annotation /// 0005768 // endosome // inferred from direct assay /// 0005886 // plasma membrane // traceable author statement /// 0005886 // plasma membrane // inferred from …	0000166 // nucleotide binding // inferred from electronic annotation /// 0004143 // diacylglycerol kinase activity // inferred from mutant phenotype /// 0004143 // diacylglycerol kinase activity // inferred from electronic annotation /// 0005524 // ATP binding // inferred from electronic annotation /// 0005543 // phospholipid binding // inferred from electronic annotation /// 0016301 // kinase ac…	chr13:42729424-42803386 (+) // 96.93 // q14.11
11727314_a_at	0.0695219	-0.0695219	-1.10118	-0.139044	1.10118	down	ABCC5	10057	0006200 // ATP catabolic process // inferred from electronic annotation /// 0006810 // transport // traceable author statement /// 0006810 // transport // inferred from electronic annotation /// 0015711 // organic anion transport // traceable author statement /// 0032496 // response to lipopolysaccharide // inferred from electronic annotation /// 0032868 // response to insulin stimulus // inferre…	0005624 // membrane fraction // inferred from direct assay /// 0005624 // membrane fraction // traceable author statement /// 0005886 // plasma membrane // traceable author statement /// 0005887 // integral to plasma membrane // traceable author statement /// 0016020 // membrane // inferred from electronic annotation /// 0016021 // integral to membrane // inferred from electronic annotation /// 0…	0000166 // nucleotide binding // inferred from electronic annotation /// 0005524 // ATP binding // inferred from electronic annotation /// 0005524 // ATP binding // traceable author statement /// 0008514 // organic anion transmembrane transporter activity // traceable author statement /// 0016887 // ATPase activity // inferred from electronic annotation /// 0017111 // nucleoside-triphosphatase ac…	chr3:183637721-183735803 (-) // 99.16 // q27.1
11745576_at	-0.104812	0.104812	1.15639	0.209623	1.15639	up	KIRREL3-AS3	283165				chr11:126872804-126875953 (+) // 93.56 // q24.2
11739591_s_at	0.0702238	-0.0702238	-1.10225	-0.140448	1.10225	down	MINA	84864	0042254 // ribosome biogenesis // inferred from electronic annotation	0005634 // nucleus // inferred from direct assay /// 0005634 // nucleus // inferred from electronic annotation /// 0005730 // nucleolus // inferred from direct assay /// 0005730 // nucleolus // inferred from electronic annotation /// 0005737 // cytoplasm // inferred from direct assay		chr3:97660660-97691295 (-) // 99.04 // q11.2
11718486_a_at	-0.00837135	0.00837135	1.01167	0.0167427	1.01167	up	EI24	9538	0006914 // autophagy // inferred from electronic annotation /// 0006915 // apoptotic process // inferred from electronic annotation /// 0006917 // induction of apoptosis // inferred from electronic annotation /// 0006917 // induction of apoptosis // traceable author statement /// 0030308 // negative regulation of cell growth // inferred from direct assay /// 0042493 // response to drug // inferre…	0005634 // nucleus // inferred from electronic annotation /// 0005737 // cytoplasm // inferred from electronic annotation /// 0005783 // endoplasmic reticulum // inferred from electronic annotation /// 0005789 // endoplasmic reticulum membrane // inferred from electronic annotation /// 0016020 // membrane // inferred from electronic annotation /// 0016021 // integral to membrane // inferred from …		chr11:125439111-125454579 (+) // 93.48 // q24.2
11736828_x_at	-0.0326071	0.0326066	1.04624	0.0652137	1.04624	up	ST3GAL1	6482	0006464 // cellular protein modification process // traceable author statement /// 0006468 // protein phosphorylation // inferred from electronic annotation /// 0006486 // protein glycosylation // inferred from electronic annotation /// 0016266 // O-glycan processing // traceable author statement /// 0043687 // post-translational protein modification // traceable author statement /// 0044267 // c…	0000139 // Golgi membrane // traceable author statement /// 0005576 // extracellular region // inferred from electronic annotation /// 0005794 // Golgi apparatus // inferred from electronic annotation /// 0016020 // membrane // inferred from electronic annotation /// 0016021 // integral to membrane // inferred from electronic annotation /// 0030173 // integral to Golgi membrane // inferred from e…	0003836 // beta-galactoside (CMP) alpha-2,3-sialyltransferase activity // inferred from electronic annotation /// 0003836 // beta-galactoside (CMP) alpha-2,3-sialyltransferase activity // traceable author statement /// 0008373 // sialyltransferase activity // inferred from electronic annotation /// 0016740 // transferase activity // inferred from electronic annotation /// 0016757 // transferase a…	chr8:134467090-134584183 (-) // 90.59 // q24.22
11717923_s_at	0.0143061	-0.0143061	-1.02003	-0.0286121	1.02003	down	YAP1	10413	0001570 // vasculogenesis // inferred from electronic annotation /// 0006351 // transcription, DNA-dependent // inferred from electronic annotation /// 0006355 // regulation of transcription, DNA-dependent // inferred from electronic annotation /// 0006357 // regulation of transcription from RNA polymerase II promoter // inferred from electronic annotation /// 0006366 // transcription from RNA po…	0005634 // nucleus // inferred from direct assay /// 0005634 // nucleus // inferred from electronic annotation /// 0005654 // nucleoplasm // traceable author statement /// 0005737 // cytoplasm // inferred from direct assay /// 0005737 // cytoplasm // inferred from electronic annotation /// 0005829 // cytosol // traceable author statement	0001076 // RNA polymerase II transcription factor binding transcription factor activity // inferred from electronic annotation /// 0003682 // chromatin binding // inferred from electronic annotation /// 0003713 // transcription coactivator activity // inferred from direct assay /// 0003713 // transcription coactivator activity // inferred from electronic annotation /// 0003714 // transcription co…	chr11:101981209-102104149 (+) // 91.79 // q22.1
11724546_at	-0.0208912	0.0208912	1.02938	0.0417824	1.02938	up	HCFC2	29915	0000122 // negative regulation of transcription from RNA polymerase II promoter // inferred from sequence or structural similarity /// 0006357 // regulation of transcription from RNA polymerase II promoter // traceable author statement /// 0016032 // viral reproduction // traceable author statement	0005634 // nucleus // inferred from electronic annotation /// 0005634 // nucleus // inferred from direct assay /// 0005737 // cytoplasm // inferred from direct assay /// 0005737 // cytoplasm // inferred from electronic annotation	0003713 // transcription coactivator activity // traceable author statement	chr12:104458234-104500299 (+) // 97.11 // q23.3
11730716_a_at	0.0167923	-0.0167923	-1.02355	-0.0335846	1.02355	down	PAGE5	90737				chrX:55246788-55250533 (+) // 87.59 // p11.21
11730612_a_at	-0.0756025	0.0756025	1.1105	0.151205	1.1105	up	MBOAT7	79143	0006644 // phospholipid metabolic process // inferred from electronic annotation /// 0008654 // phospholipid biosynthetic process // inferred from electronic annotation	0016020 // membrane // inferred from electronic annotation /// 0016021 // integral to membrane // inferred from electronic annotation	0004872 // receptor activity // inferred from electronic annotation /// 0016740 // transferase activity // inferred from electronic annotation /// 0016746 // transferase activity, transferring acyl groups // inferred from electronic annotation /// 0016747 // transferase activity, transferring acyl groups other than amino-acyl groups // inferred from electronic annotation	chr19:54681993-54693733 (-) // 82.66 // q13.42
11718387_s_at	0.00738716	-0.00738716	-1.01029	-0.0147743	1.01029	down	ZFYVE20	64145	0006810 // transport // inferred from electronic annotation /// 0007596 // blood coagulation // traceable author statement /// 0015031 // protein transport // inferred from electronic annotation /// 0016197 // endosomal transport // non-traceable author statement	0005622 // intracellular // inferred from electronic annotation /// 0005768 // endosome // non-traceable author statement /// 0005768 // endosome // inferred from electronic annotation /// 0005886 // plasma membrane // inferred from electronic annotation /// 0010008 // endosome membrane // traceable author statement /// 0016020 // membrane // inferred from electronic annotation /// 0031901 // ear…	0005515 // protein binding // inferred from physical interaction /// 0008270 // zinc ion binding // non-traceable author statement /// 0008270 // zinc ion binding // inferred from electronic annotation /// 0017137 // Rab GTPase binding // inferred from electronic annotation /// 0046872 // metal ion binding // inferred from electronic annotation	chr3:15111579-15140664 (-) // 84.74 // p25.1
11715842_a_at	-0.128688	0.128688	1.1953	0.257376	1.1953	up	MAPK1	5594	0000165 // MAPK cascade // traceable author statement /// 0000165 // MAPK cascade // inferred from electronic annotation /// 0000186 // activation of MAPKK activity // traceable author statement /// 0000187 // activation of MAPK activity // traceable author statement /// 0000189 // MAPK import into nucleus // inferred from electronic annotation /// 0002224 // toll-like receptor signaling pathway …	0005625 // soluble fraction // inferred from electronic annotation /// 0005626 // insoluble fraction // inferred from electronic annotation /// 0005634 // nucleus // traceable author statement /// 0005634 // nucleus // inferred from electronic annotation /// 0005654 // nucleoplasm // traceable author statement /// 0005654 // nucleoplasm // inferred from electronic annotation /// 0005737 // cytopl…	0000166 // nucleotide binding // inferred from electronic annotation /// 0001784 // phosphotyrosine binding // inferred from electronic annotation /// 0003677 // DNA binding // inferred from electronic annotation /// 0004672 // protein kinase activity // inferred from electronic annotation /// 0004674 // protein serine/threonine kinase activity // inferred from direct assay /// 0004674 // protein…	chr22:22108791-22221970 (-) // 87.22 // q11.21
11722863_at	0.0369661	-0.0369658	-1.05258	-0.0739319	1.05258	down	SCGB2A1	4246			0005496 // steroid binding // inferred from electronic annotation /// 0005497 // androgen binding // non-traceable author statement	chr11:61976144-61981415 (+) // 94.72 // q12.3
11751154_x_at	0.0899878	-0.0899878	-1.13286	-0.179976	1.13286	down	ALDOC	230	0001666 // response to hypoxia // inferred from electronic annotation /// 0005975 // carbohydrate metabolic process // traceable author statement /// 0006000 // fructose metabolic process // traceable author statement /// 0006006 // glucose metabolic process // traceable author statement /// 0006094 // gluconeogenesis // traceable author statement /// 0006096 // glycolysis // inferred from electr…	0005737 // cytoplasm // inferred from electronic annotation /// 0005739 // mitochondrion // inferred from electronic annotation /// 0005829 // cytosol // traceable author statement /// 0005856 // cytoskeleton // inferred by curator /// 0030424 // axon // inferred from electronic annotation	0003824 // catalytic activity // inferred from electronic annotation /// 0004332 // fructose-bisphosphate aldolase activity // inferred from direct assay /// 0004332 // fructose-bisphosphate aldolase activity // inferred from electronic annotation /// 0005515 // protein binding // inferred from physical interaction /// 0008092 // cytoskeletal protein binding // inferred from direct assay /// 0016…	chr17:26900134-26903912 (-) // 99.42 // q11.2
11726904_a_at	-0.0165091	0.0165091	1.02315	0.0330181	1.02315	up	COBL	23242	0001843 // neural tube closure // inferred from electronic annotation		0003779 // actin binding // inferred from electronic annotation	chr7:51083909-51384515 (-) // 99.51 // p12.1
11753940_a_at	0	0	-1	0	1	down	NRL	4901	0006351 // transcription, DNA-dependent // inferred from electronic annotation /// 0006355 // regulation of transcription, DNA-dependent // inferred from electronic annotation /// 0006366 // transcription from RNA polymerase II promoter // traceable author statement /// 0007275 // multicellular organismal development // inferred from electronic annotation /// 0007468 // regulation of rhodopsin ge…	0005634 // nucleus // inferred from electronic annotation /// 0005634 // nucleus // traceable author statement	0003677 // DNA binding // traceable author statement /// 0003677 // DNA binding // inferred from electronic annotation /// 0003700 // sequence-specific DNA binding transcription factor activity // inferred from electronic annotation /// 0043522 // leucine zipper domain binding // inferred from physical interaction /// 0043565 // sequence-specific DNA binding // inferred from electronic annotation	chr14:24549316-24584223 (-) // 91.15 // q11.2
11751357_a_at	-0.0627952	0.0627952	1.09095	0.12559	1.09095	up	MEI1	150365	0007126 // meiosis // inferred from electronic annotation /// 0007141 // male meiosis I // inferred from electronic annotation /// 0007276 // gamete generation // inferred from electronic annotation /// 0007286 // spermatid development // inferred from electronic annotation			chr22:42148507-42177849 (+) // 98.98 // q13.2
11727430_s_at	-0.13352	0.13352	1.20334	0.26704	1.20334	up	C6orf162	57150		0016020 // membrane // inferred from electronic annotation /// 0016021 // integral to membrane // inferred from electronic annotation		chr6:88046724-88052041 (+) // 91.8 // q15
11721103_a_at	0.0212469	-0.0212469	-1.02989	-0.0424938	1.02989	down	POLDIP3	84271	0006417 // regulation of translation // inferred from electronic annotation /// 0045727 // positive regulation of translation // inferred from mutant phenotype	0005634 // nucleus // inferred from direct assay /// 0005634 // nucleus // inferred from electronic annotation /// 0005730 // nucleolus // inferred from direct assay /// 0005737 // cytoplasm // traceable author statement /// 0005737 // cytoplasm // inferred from electronic annotation /// 0016607 // nuclear speck // inferred from direct assay /// 0016607 // nuclear speck // inferred from electroni…	0000166 // nucleotide binding // inferred from electronic annotation /// 0003676 // nucleic acid binding // inferred from electronic annotation /// 0003723 // RNA binding // inferred from electronic annotation /// 0005515 // protein binding // inferred from physical interaction	chr22:42979727-43010962 (-) // 99.49 // q13.2
11755049_a_at	-0.047123	0.047123	1.06751	0.0942459	1.06751	up	PIK3C3	5289	0000045 // autophagic vacuole assembly // inferred from electronic annotation /// 0000910 // cytokinesis // inferred from mutant phenotype /// 0006468 // protein phosphorylation // inferred from electronic annotation /// 0006914 // autophagy // inferred from electronic annotation /// 0007032 // endosome organization // inferred from electronic annotation /// 0007049 // cell cycle // inferred from…	0005768 // endosome // inferred from electronic annotation /// 0005770 // late endosome // inferred from direct assay /// 0005770 // late endosome // inferred from electronic annotation /// 0005829 // cytosol // traceable author statement /// 0030496 // midbody // inferred from direct assay /// 0030496 // midbody // inferred from electronic annotation	0000166 // nucleotide binding // inferred from electronic annotation /// 0004672 // protein kinase activity // inferred from electronic annotation /// 0005515 // protein binding // inferred from physical interaction /// 0005524 // ATP binding // inferred from electronic annotation /// 0016301 // kinase activity // inferred from electronic annotation /// 0016303 // 1-phosphatidylinositol-3-kinase …	chr18:39605275-39661443 (+) // 79.99 // q12.3
11764109_at	-0.0164716	0.0164716	1.0231	0.0329433	1.0231	up						chr6:163789337-163789753 (-) // 99.52 // q26
11749470_a_at	0.0564356	-0.0564356	-1.08138	-0.112871	1.08138	down	TRPM8	79054	0006810 // transport // inferred from electronic annotation /// 0006811 // ion transport // inferred from electronic annotation /// 0006816 // calcium ion transport // inferred from electronic annotation /// 0006874 // cellular calcium ion homeostasis // inferred from electronic annotation /// 0009266 // response to temperature stimulus // inferred from electronic annotation /// 0009409 // respon…	0009897 // external side of plasma membrane // inferred from electronic annotation /// 0016020 // membrane // inferred from electronic annotation /// 0016021 // integral to membrane // inferred from electronic annotation	0004872 // receptor activity // inferred from electronic annotation /// 0005216 // ion channel activity // inferred from electronic annotation /// 0005262 // calcium channel activity // inferred from electronic annotation /// 0042803 // protein homodimerization activity // inferred from electronic annotation	chr2:234826049-234925973 (+) // 96.93 // q37.1
11750933_a_at	0.0637619	-0.0637619	-1.09242	-0.127524	1.09242	down	ZNF480	147657	0006351 // transcription, DNA-dependent // inferred from electronic annotation /// 0006355 // regulation of transcription, DNA-dependent // inferred from electronic annotation	0005622 // intracellular // inferred from electronic annotation /// 0005634 // nucleus // inferred from direct assay /// 0005634 // nucleus // inferred from electronic annotation /// 0005730 // nucleolus // inferred from direct assay /// 0005737 // cytoplasm // inferred from direct assay	0003676 // nucleic acid binding // inferred from electronic annotation /// 0008270 // zinc ion binding // inferred from electronic annotation /// 0046872 // metal ion binding // inferred from electronic annotation	chr19:52800431-52826411 (+) // 95.51 // q13.41
11746026_x_at	0.0544615	-0.0544617	-1.07842	-0.108923	1.07842	down	MILR1	284021	0033004 // negative regulation of mast cell activation // inferred from sequence or structural similarity /// 0043303 // mast cell degranulation // inferred from sequence or structural similarity	0005886 // plasma membrane // inferred from electronic annotation /// 0005887 // integral to plasma membrane // non-traceable author statement /// 0016020 // membrane // inferred from electronic annotation /// 0016021 // integral to membrane // inferred from electronic annotation	0005515 // protein binding // inferred from sequence or structural similarity
11723087_at	-0.0810928	0.0810924	1.11898	0.162185	1.11898	up	GAS2L1	10634	0001578 // microtubule bundle formation // inferred from mutant phenotype /// 0007026 // negative regulation of microtubule depolymerization // inferred from mutant phenotype /// 0007050 // cell cycle arrest // inferred from sequence or structural similarity /// 0007050 // cell cycle arrest // inferred from electronic annotation /// 0009267 // cellular response to starvation // inferred from sequ…	0001725 // stress fiber // inferred from direct assay /// 0001725 // stress fiber // inferred from electronic annotation /// 0005737 // cytoplasm // inferred from direct assay /// 0005737 // cytoplasm // inferred from electronic annotation /// 0005856 // cytoskeleton // inferred from electronic annotation /// 0005874 // microtubule // inferred from direct assay /// 0005874 // microtubule // infer…	0008017 // microtubule binding // inferred from direct assay /// 0008093 // cytoskeletal adaptor activity // inferred from direct assay /// 0046966 // thyroid hormone receptor binding // inferred from direct assay	chr22:29702346-29708776 (+) // 89.67 // q12.2
11749176_a_at	-0.205317	0.205317	1.32927	0.410635	1.32927	up	RIOK3	8780	0006468 // protein phosphorylation // inferred from electronic annotation /// 0007059 // chromosome segregation // traceable author statement /// 0016310 // phosphorylation // inferred from electronic annotation		0000166 // nucleotide binding // inferred from electronic annotation /// 0003824 // catalytic activity // inferred from electronic annotation /// 0004674 // protein serine/threonine kinase activity // inferred from electronic annotation /// 0005515 // protein binding // inferred from physical interaction /// 0005524 // ATP binding // inferred from electronic annotation /// 0016301 // kinase activ…	chr18:21033250-21061544 (+) // 99.95 // q11.2
11719577_a_at	-0.105627	0.105627	1.15769	0.211254	1.15769	up	AMT	275	0006546 // glycine catabolic process // inferred from electronic annotation /// 0006546 // glycine catabolic process // traceable author statement /// 0032259 // methylation // inferred from electronic annotation	0005737 // cytoplasm // inferred from electronic annotation /// 0005739 // mitochondrion // inferred from electronic annotation /// 0005739 // mitochondrion // traceable author statement	0004047 // aminomethyltransferase activity // inferred from electronic annotation /// 0008168 // methyltransferase activity // inferred from electronic annotation /// 0008483 // transaminase activity // inferred from electronic annotation /// 0016740 // transferase activity // inferred from electronic annotation	chr3:49454210-49460111 (-) // 94.96 // p21.31
11741646_s_at	-0.184547	0.184547	1.29154	0.369095	1.29154	up	ATXN7L1	222255				chr7:105245220-105319653 (-) // 98.34 // q22.3
11720729_at	-0.0194507	0.0194507	1.02733	0.0389013	1.02733	up	CSDC2	27254	0006355 // regulation of transcription, DNA-dependent // inferred from electronic annotation /// 0006397 // mRNA processing // inferred from electronic annotation /// 0006398 // histone mRNA 3'-end processing // non-traceable author statement	0005634 // nucleus // non-traceable author statement /// 0005634 // nucleus // inferred from electronic annotation /// 0005737 // cytoplasm // non-traceable author statement /// 0005737 // cytoplasm // inferred from electronic annotation	0003676 // nucleic acid binding // inferred from electronic annotation /// 0003677 // DNA binding // inferred from electronic annotation /// 0003723 // RNA binding // non-traceable author statement /// 0003723 // RNA binding // inferred from electronic annotation	chr22:41956766-41972670 (+) // 96.31 // q13.2
11729235_s_at	-0.0778055	0.0778055	1.11389	0.155611	1.11389	up	E2F6	1876	0000083 // regulation of transcription involved in G1/S phase of mitotic cell cycle // inferred from electronic annotation /// 0000122 // negative regulation of transcription from RNA polymerase II promoter // traceable author statement /// 0006351 // transcription, DNA-dependent // inferred from electronic annotation /// 0006355 // regulation of transcription, DNA-dependent // inferred from elec…	0005634 // nucleus // inferred from electronic annotation /// 0005667 // transcription factor complex // inferred from electronic annotation /// 0071339 // MLL1 complex // inferred from direct assay	0003677 // DNA binding // inferred from electronic annotation /// 0003677 // DNA binding // traceable author statement /// 0003700 // sequence-specific DNA binding transcription factor activity // inferred from electronic annotation /// 0003714 // transcription corepressor activity // traceable author statement	chr2:11584500-11606303 (-) // 83.35 // p25.1
11719930_a_at	-0.00974274	0.00974274	1.0136	0.0194855	1.0136	up	ARGLU1	55082	0006351 // transcription, DNA-dependent // inferred from electronic annotation /// 0006355 // regulation of transcription, DNA-dependent // inferred from electronic annotation	0005634 // nucleus // inferred from electronic annotation		chr13:107194928-107220512 (-) // 94.79 // q33.3
11733612_s_at	0.0644045	-0.0644045	-1.09339	-0.128809	1.09339	down	DOCK8	81704	0007596 // blood coagulation // traceable author statement	0005829 // cytosol // traceable author statement	0005085 // guanyl-nucleotide exchange factor activity // inferred from electronic annotation /// 0005525 // GTP binding // inferred from electronic annotation /// 0051020 // GTPase binding // inferred from electronic annotation	chr9:214864-465255 (+) // 98.62 // p24.3
11745881_a_at	-0.109062	0.109062	1.16322	0.218123	1.16322	up	GUCA1A	2978	0007165 // signal transduction // non-traceable author statement /// 0007601 // visual perception // inferred from electronic annotation /// 0007601 // visual perception // traceable author statement /// 0007602 // phototransduction // inferred from electronic annotation /// 0031282 // regulation of guanylate cyclase activity // inferred from electronic annotation /// 0050896 // response to stimu…	0016020 // membrane // inferred from electronic annotation	0005509 // calcium ion binding // inferred from electronic annotation /// 0008048 // calcium sensitive guanylate cyclase activator activity // traceable author statement /// 0008048 // calcium sensitive guanylate cyclase activator activity // inferred from electronic annotation /// 0030249 // guanylate cyclase regulator activity // inferred from electronic annotation	chr6:42123183-42147806 (+) // 92.41 // p21.1
11750096_a_at	0.0235443	-0.0235443	-1.03318	-0.0470886	1.03318	down	CTNND2	1501	0001763 // morphogenesis of a branching structure // inferred from electronic annotation /// 0006351 // transcription, DNA-dependent // inferred from electronic annotation /// 0006355 // regulation of transcription, DNA-dependent // inferred from electronic annotation /// 0007155 // cell adhesion // traceable author statement /// 0007155 // cell adhesion // inferred from electronic annotation ///…	0005634 // nucleus // inferred from electronic annotation /// 0005737 // cytoplasm // traceable author statement /// 0005912 // adherens junction // inferred from electronic annotation /// 0014069 // postsynaptic density // inferred from electronic annotation /// 0019717 // synaptosome // inferred from electronic annotation /// 0030054 // cell junction // inferred from electronic annotation /// 0…	0005515 // protein binding // inferred from physical interaction	chr5:10972992-11904092 (-) // 99.76 // p15.2
11723609_a_at	0.0317969	-0.0317972	-1.04507	-0.0635941	1.04507	down	HABP2	3026	0006508 // proteolysis // inferred from electronic annotation /// 0007155 // cell adhesion // traceable author statement	0005576 // extracellular region // non-traceable author statement /// 0005576 // extracellular region // inferred from electronic annotation /// 0005615 // extracellular space // traceable author statement	0003824 // catalytic activity // inferred from electronic annotation /// 0004252 // serine-type endopeptidase activity // inferred from electronic annotation /// 0005539 // glycosaminoglycan binding // traceable author statement /// 0008233 // peptidase activity // inferred from electronic annotation /// 0008236 // serine-type peptidase activity // inferred from electronic annotation /// 0016787 …	chr10:115312736-115349367 (+) // 99.84 // q25.3
11727450_a_at	0.0916691	-0.0916691	-1.13551	-0.183338	1.13551	down	MORN4	118812				chr10:99374311-99393344 (-) // 79.38 // q24.2
11736473_a_at	-0.197914	0.197914	1.3157	0.395827	1.3157	up	TCF7	6932	0006351 // transcription, DNA-dependent // inferred from electronic annotation /// 0006355 // regulation of transcription, DNA-dependent // not recorded /// 0006355 // regulation of transcription, DNA-dependent // inferred from electronic annotation /// 0006357 // regulation of transcription from RNA polymerase II promoter // not recorded /// 0006357 // regulation of transcription from RNA polyme…	0005634 // nucleus // inferred from direct assay /// 0005634 // nucleus // inferred from electronic annotation /// 0005667 // transcription factor complex // not recorded	0003677 // DNA binding // inferred from electronic annotation /// 0003682 // chromatin binding // not recorded /// 0003700 // sequence-specific DNA binding transcription factor activity // not recorded /// 0003700 // sequence-specific DNA binding transcription factor activity // inferred from electronic annotation /// 0005515 // protein binding // inferred from physical interaction /// 0008013 //…	chr5:133451300-133483919 (+) // 89.87 // q31.1
11739863_a_at	0.0154138	-0.0154138	-1.0216	-0.0308275	1.0216	down	TTF2	8458	0006351 // transcription, DNA-dependent // inferred from electronic annotation /// 0006353 // transcription termination, DNA-dependent // traceable author statement /// 0006353 // transcription termination, DNA-dependent // inferred from electronic annotation /// 0006355 // regulation of transcription, DNA-dependent // inferred from electronic annotation /// 0006369 // termination of RNA polymera…	0005634 // nucleus // inferred from direct assay /// 0005634 // nucleus // inferred from electronic annotation /// 0005681 // spliceosomal complex // inferred from electronic annotation /// 0005737 // cytoplasm // inferred from direct assay /// 0005737 // cytoplasm // inferred from electronic annotation /// 0008023 // transcription elongation factor complex // traceable author statement	0000166 // nucleotide binding // inferred from electronic annotation /// 0003676 // nucleic acid binding // inferred from electronic annotation /// 0003677 // DNA binding // inferred from electronic annotation /// 0004386 // helicase activity // inferred from electronic annotation /// 0005515 // protein binding // inferred from physical interaction /// 0005524 // ATP binding // inferred from elec…	chr1:117602948-117645489 (+) // 89.78 // p13.1
11735984_at	0	0	-1	0	1	down	OR2B6	26212	0007165 // signal transduction // inferred from electronic annotation /// 0007186 // G-protein coupled receptor signaling pathway // inferred from electronic annotation /// 0007608 // sensory perception of smell // inferred from electronic annotation /// 0050896 // response to stimulus // inferred from electronic annotation /// 0050911 // detection of chemical stimulus involved in sensory percept…	0005886 // plasma membrane // traceable author statement /// 0005886 // plasma membrane // inferred from electronic annotation /// 0016020 // membrane // inferred from electronic annotation /// 0016021 // integral to membrane // inferred from electronic annotation	0004871 // signal transducer activity // inferred from electronic annotation /// 0004872 // receptor activity // inferred from electronic annotation /// 0004930 // G-protein coupled receptor activity // inferred from electronic annotation /// 0004984 // olfactory receptor activity // inferred from electronic annotation	chr6:27925018-27925960 (+) // 99.16 // p22.1
11727105_s_at	0.0334256	-0.0334258	-1.04743	-0.0668514	1.04743	down	FGD5	152273	0007010 // cytoskeleton organization // inferred from sequence or structural similarity /// 0008360 // regulation of cell shape // inferred from sequence or structural similarity /// 0030036 // actin cytoskeleton organization // inferred from sequence or structural similarity /// 0035023 // regulation of Rho protein signal transduction // inferred from electronic annotation /// 0043088 // regulat…	0001726 // ruffle // inferred from sequence or structural similarity /// 0005622 // intracellular // inferred from electronic annotation /// 0005737 // cytoplasm // inferred from sequence or structural similarity /// 0005737 // cytoplasm // inferred from electronic annotation /// 0005794 // Golgi apparatus // inferred from sequence or structural similarity /// 0005856 // cytoskeleton // inferred …	0005085 // guanyl-nucleotide exchange factor activity // inferred from sequence or structural similarity /// 0005085 // guanyl-nucleotide exchange factor activity // inferred from electronic annotation /// 0005089 // Rho guanyl-nucleotide exchange factor activity // inferred from electronic annotation /// 0005543 // phospholipid binding // inferred from electronic annotation /// 0031267 // small …	chr3:14860482-14976072 (+) // 98.53 // p25.1
11756401_x_at	0.0168285	-0.0168285	-1.0236	-0.0336571	1.0236	down	FAM49B	51571				chr8:130853718-131028697 (-) // 70.01 // q24.21
11735552_at	-0.0516672	0.0516672	1.07425	0.103334	1.07425	up	FCRL6	343413		0009897 // external side of plasma membrane // inferred from direct assay /// 0009897 // external side of plasma membrane // inferred from electronic annotation /// 0016020 // membrane // inferred from electronic annotation /// 0016021 // integral to membrane // inferred from electronic annotation	0004872 // receptor activity // inferred from electronic annotation /// 0019903 // protein phosphatase binding // inferred from electronic annotation	chr1:159770301-159786047 (+) // 84.62 // q23.2
11757770_s_at	0.055933	-0.055933	-1.08062	-0.111866	1.08062	down	TOMM70A	9868	0006626 // protein targeting to mitochondrion // traceable author statement /// 0044267 // cellular protein metabolic process // traceable author statement	0005739 // mitochondrion // inferred from direct assay /// 0005739 // mitochondrion // inferred from electronic annotation /// 0005741 // mitochondrial outer membrane // inferred from electronic annotation /// 0005742 // mitochondrial outer membrane translocase complex // traceable author statement /// 0016020 // membrane // inferred from electronic annotation /// 0016021 // integral to membrane …	0004872 // receptor activity // inferred from electronic annotation /// 0005515 // protein binding // inferred from physical interaction /// 0008320 // protein transmembrane transporter activity // traceable author statement	chr3:100082307-100082909 (-) // 90.92 // q12.2
11728073_a_at	-0.100056	0.100056	1.14879	0.200112	1.14879	up	ITPRIP	85450		0005886 // plasma membrane // inferred from electronic annotation /// 0016020 // membrane // inferred from electronic annotation		chr10:106071900-106093713 (-) // 98.8 // q25.1
11743191_a_at	-0.05602	0.0560198	1.08076	0.11204	1.08076	up	LOC100653217 /// NTM	100653217 /// 50863	0007155 // cell adhesion // inferred from electronic annotation /// 0007155 // cell adhesion // non-traceable author statement /// 0008038 // neuron recognition // traceable author statement	0005886 // plasma membrane // inferred from electronic annotation /// 0016020 // membrane // inferred from electronic annotation /// 0031225 // anchored to membrane // inferred from electronic annotation	0005515 // protein binding // inferred from physical interaction	chr11:131780518-132206715 (+) // 96.55 // q25
11721561_a_at	0.0609655	-0.0609655	-1.08819	-0.121931	1.08819	down	AHCYL2	23382	0006730 // one-carbon metabolic process // inferred from electronic annotation		0000166 // nucleotide binding // inferred from electronic annotation /// 0004013 // adenosylhomocysteinase activity // inferred from electronic annotation /// 0016787 // hydrolase activity // inferred from electronic annotation	chr7:128864870-129070051 (+) // 93.63 // q32.1
11740776_a_at	-0.0398259	0.0398259	1.05676	0.0796518	1.05676	up	CCDC36	339834				chr3:49235860-49295537 (+) // 94.67 // p21.31
11750796_a_at	-0.0536532	0.0536532	1.07722	0.107306	1.07722	up	DNER	92737	0001764 // neuron migration // non-traceable author statement /// 0006897 // endocytosis // non-traceable author statement /// 0007219 // Notch signaling pathway // traceable author statement /// 0007219 // Notch signaling pathway // inferred from electronic annotation /// 0007220 // Notch receptor processing // inferred from electronic annotation /// 0007416 // synapse assembly // non-traceable …	0005769 // early endosome // inferred from direct assay /// 0005886 // plasma membrane // inferred from direct assay /// 0005886 // plasma membrane // inferred from electronic annotation /// 0016020 // membrane // inferred from electronic annotation /// 0016021 // integral to membrane // inferred from electronic annotation /// 0030425 // dendrite // inferred from direct assay /// 0030425 // dendr…	0004872 // receptor activity // inferred from electronic annotation /// 0004888 // transmembrane signaling receptor activity // traceable author statement /// 0005112 // Notch binding // inferred from electronic annotation /// 0005509 // calcium ion binding // non-traceable author statement /// 0005509 // calcium ion binding // inferred from electronic annotation /// 0005515 // protein binding //…	chr2:230222831-230451615 (-) // 97.71 // q36.3
11756636_x_at	0.0930095	-0.0930095	-1.13762	-0.186019	1.13762	down	PCED1A	64773			0016787 // hydrolase activity // inferred from electronic annotation	chr20:2816005-2821314 (-) // 93.58 // p13
11730313_a_at	0.15051	-0.15051	-1.23202	-0.301021	1.23202	down	ERMAP	114625		0005737 // cytoplasm // inferred from electronic annotation /// 0005886 // plasma membrane // inferred from direct assay /// 0005886 // plasma membrane // inferred from electronic annotation /// 0016020 // membrane // inferred from electronic annotation /// 0016021 // integral to membrane // inferred from electronic annotation /// 0031410 // cytoplasmic vesicle // inferred from electronic annotat…		chr1:43282758-43310655 (+) // 82.7 // p34.2
11734540_at	0.0768781	-0.0768781	-1.11246	-0.153756	1.11246	down	LOC728819	728819				chr2:43902291-43903461 (-) // 83.18 // p21
11715925_a_at	0.031826	-0.031826	-1.04511	-0.063652	1.04511	down	TRAM1	23471	0006412 // translation // traceable author statement /// 0006613 // cotranslational protein targeting to membrane // traceable author statement /// 0006614 // SRP-dependent cotranslational protein targeting to membrane // traceable author statement /// 0006810 // transport // inferred from electronic annotation /// 0010467 // gene expression // traceable author statement /// 0015031 // protein tr…	0005783 // endoplasmic reticulum // traceable author statement /// 0005783 // endoplasmic reticulum // inferred from electronic annotation /// 0005789 // endoplasmic reticulum membrane // inferred from electronic annotation /// 0016020 // membrane // inferred from electronic annotation /// 0016021 // integral to membrane // inferred from electronic annotation /// 0016021 // integral to membrane /…	0004872 // receptor activity // traceable author statement /// 0005515 // protein binding // inferred from physical interaction	chr8:71485454-71520714 (-) // 92.64 // q13.3
11745325_a_at	-0.0831413	0.0831413	1.12216	0.166283	1.12216	up	ZNF497	162968	0006351 // transcription, DNA-dependent // inferred from electronic annotation /// 0006355 // regulation of transcription, DNA-dependent // inferred from electronic annotation	0005622 // intracellular // inferred from electronic annotation /// 0005634 // nucleus // inferred from electronic annotation	0003676 // nucleic acid binding // inferred from electronic annotation /// 0003677 // DNA binding // inferred from electronic annotation /// 0008270 // zinc ion binding // inferred from electronic annotation /// 0046872 // metal ion binding // inferred from electronic annotation	chr19:58866926-58874214 (-) // 99.96 // q13.43
11752744_a_at	0.0719929	-0.0719924	-1.10495	-0.143985	1.10495	down	LGMN	5641	0001101 // response to acid // inferred from electronic annotation /// 0006508 // proteolysis // inferred from electronic annotation /// 0006508 // proteolysis // inferred from sequence or structural similarity /// 0008202 // steroid metabolic process // traceable author statement /// 0040015 // negative regulation of multicellular organism growth // inferred from electronic annotation /// 004235…	0005764 // lysosome // inferred from electronic annotation /// 0005770 // late endosome // inferred from electronic annotation /// 0043202 // lysosomal lumen // traceable author statement /// 0045177 // apical part of cell // inferred from electronic annotation	0004197 // cysteine-type endopeptidase activity // inferred from electronic annotation /// 0004197 // cysteine-type endopeptidase activity // inferred from sequence or structural similarity /// 0008233 // peptidase activity // inferred from direct assay /// 0008233 // peptidase activity // inferred from electronic annotation /// 0008234 // cysteine-type peptidase activity // inferred from electro…	chr14:93170472-93214972 (-) // 95.86 // q32.12
11736147_s_at	-0.00675821	0.00675821	1.00941	0.0135164	1.00941	up	LYRM2 /// ZC3H11A	57226 /// 9877		0005739 // mitochondrion // inferred from electronic annotation	0003676 // nucleic acid binding // inferred from electronic annotation /// 0005515 // protein binding // inferred from physical interaction /// 0008270 // zinc ion binding // inferred from electronic annotation /// 0046872 // metal ion binding // inferred from electronic annotation	chr6:90341944-90348475 (-) // 64.9 // q15
11727772_a_at	0	0	-1	0	1	down	PITPNM2	57605	0006810 // transport // inferred from electronic annotation /// 0008152 // metabolic process // non-traceable author statement	0005622 // intracellular // inferred from electronic annotation /// 0005625 // soluble fraction // inferred from electronic annotation /// 0012505 // endomembrane system // inferred from electronic annotation /// 0016020 // membrane // inferred from electronic annotation /// 0016021 // integral to membrane // non-traceable author statement /// 0043231 // intracellular membrane-bounded organelle /…	0005509 // calcium ion binding // non-traceable author statement /// 0008289 // lipid binding // inferred from electronic annotation /// 0046872 // metal ion binding // inferred from electronic annotation	chr12:123468026-123634562 (-) // 98.54 // q24.31
11747878_a_at	-0.00886726	0.00886726	1.01237	0.0177345	1.01237	up	STX3	6809	0006810 // transport // inferred from electronic annotation /// 0006836 // neurotransmitter transport // inferred from electronic annotation /// 0006886 // intracellular protein transport // inferred from electronic annotation /// 0006887 // exocytosis // inferred from electronic annotation /// 0006944 // cellular membrane fusion // inferred from electronic annotation /// 0016192 // vesicle-media…	0005622 // intracellular // inferred from electronic annotation /// 0005773 // vacuole // traceable author statement /// 0005911 // cell-cell junction // inferred from direct assay /// 0016020 // membrane // inferred from electronic annotation /// 0016021 // integral to membrane // inferred from electronic annotation /// 0016324 // apical plasma membrane // inferred from direct assay /// 0016324 …	0005484 // SNAP receptor activity // inferred from electronic annotation /// 0005515 // protein binding // inferred from physical interaction /// 0050544 // arachidonic acid binding // inferred from sequence or structural similarity /// 0050544 // arachidonic acid binding // inferred from electronic annotation	chr11:59522924-59568958 (+) // 96.76 // q12.1
11715826_x_at	-0.0796728	0.0796728	1.11678	0.159346	1.11678	up	HMG20B	10362	0006325 // chromatin organization // non-traceable author statement /// 0006351 // transcription, DNA-dependent // inferred from electronic annotation /// 0006355 // regulation of transcription, DNA-dependent // non-traceable author statement /// 0006355 // regulation of transcription, DNA-dependent // inferred from electronic annotation /// 0007049 // cell cycle // inferred from electronic annot…	0005634 // nucleus // non-traceable author statement /// 0005634 // nucleus // inferred from electronic annotation /// 0005654 // nucleoplasm // traceable author statement /// 0005694 // chromosome // inferred from electronic annotation	0003677 // DNA binding // non-traceable author statement /// 0003677 // DNA binding // inferred from electronic annotation /// 0003700 // sequence-specific DNA binding transcription factor activity // non-traceable author statement /// 0005515 // protein binding // inferred from physical interaction	chr19:3572942-3579233 (+) // 92.13 // p13.3
11751973_x_at	0.104908	-0.104908	-1.15654	-0.209816	1.15654	down	PROSAPIP1	9762	0051260 // protein homooligomerization // inferred from electronic annotation	0005737 // cytoplasm // inferred from electronic annotation /// 0005856 // cytoskeleton // inferred from electronic annotation /// 0005886 // plasma membrane // inferred from electronic annotation /// 0014069 // postsynaptic density // inferred from sequence or structural similarity /// 0014069 // postsynaptic density // inferred from electronic annotation /// 0016020 // membrane // inferred from…	0030165 // PDZ domain binding // inferred from electronic annotation /// 0043621 // protein self-association // inferred from electronic annotation	chr20:3143274-3154194 (-) // 95.54 // p13
11720944_at	0.0978303	-0.0978303	-1.14525	-0.195661	1.14525	down	RGS16	6004	0007601 // visual perception // traceable author statement /// 0008277 // regulation of G-protein coupled receptor protein signaling pathway // traceable author statement /// 0009968 // negative regulation of signal transduction // inferred from electronic annotation /// 0038032 // termination of G-protein coupled receptor signaling pathway // inferred from electronic annotation /// 0043547 // po…	0005624 // membrane fraction // inferred from electronic annotation /// 0005737 // cytoplasm // not recorded /// 0005886 // plasma membrane // not recorded /// 0045121 // membrane raft // inferred from electronic annotation	0005096 // GTPase activator activity // not recorded /// 0005096 // GTPase activator activity // traceable author statement /// 0005515 // protein binding // inferred from physical interaction /// 0005516 // calmodulin binding // traceable author statement	chr1:182567757-182573548 (-) // 88.47 // q25.3
11719697_a_at	0.24326	-0.243261	-1.40106	-0.486521	1.40106	down	HSPB11	51668	0006950 // response to stress // inferred from electronic annotation /// 0007155 // cell adhesion // inferred from electronic annotation	0005929 // cilium // inferred from electronic annotation /// 0030992 // intraflagellar transport particle B // inferred from electronic annotation		chr1:54387233-54411602 (-) // 73.84 // p32.3
11750814_a_at	-0.0204952	0.0204952	1.02882	0.0409904	1.02882	up	BEND2	139105				chrX:18189058-18238956 (-) // 92.07 // p22.13
11760040_x_at	0.00944614	-0.00944614	-1.01318	-0.0188923	1.01318	down	NDUFB4	4710	0006120 // mitochondrial electron transport, NADH to ubiquinone // non-traceable author statement /// 0006810 // transport // inferred from electronic annotation /// 0006979 // response to oxidative stress // inferred from direct assay /// 0022900 // electron transport chain // inferred from electronic annotation /// 0022904 // respiratory electron transport chain // traceable author statement //…	0005739 // mitochondrion // inferred from electronic annotation /// 0005743 // mitochondrial inner membrane // traceable author statement /// 0005743 // mitochondrial inner membrane // inferred from electronic annotation /// 0005747 // mitochondrial respiratory chain complex I // inferred from direct assay /// 0005747 // mitochondrial respiratory chain complex I // non-traceable author statement …	0008137 // NADH dehydrogenase (ubiquinone) activity // non-traceable author statement /// 0008137 // NADH dehydrogenase (ubiquinone) activity // inferred from electronic annotation	chr3:120315156-120320471 (+) // 99.33 // q13.33
11740214_a_at	-0.351445	0.351445	1.62776	0.70289	1.62776	up	TBL1X	6907	0000122 // negative regulation of transcription from RNA polymerase II promoter // inferred from direct assay /// 0006351 // transcription, DNA-dependent // inferred from electronic annotation /// 0006355 // regulation of transcription, DNA-dependent // inferred from electronic annotation /// 0006357 // regulation of transcription from RNA polymerase II promoter // inferred from electronic annota…	0000118 // histone deacetylase complex // inferred from direct assay /// 0005634 // nucleus // inferred from direct assay /// 0005634 // nucleus // inferred from electronic annotation /// 0005654 // nucleoplasm // traceable author statement /// 0005667 // transcription factor complex // inferred from electronic annotation /// 0005876 // spindle microtubule // inferred from direct assay /// 001705…	0003677 // DNA binding // inferred from electronic annotation /// 0003682 // chromatin binding // inferred from electronic annotation /// 0003714 // transcription corepressor activity // inferred from direct assay /// 0003714 // transcription corepressor activity // inferred from genetic interaction /// 0003714 // transcription corepressor activity // inferred from electronic annotation /// 00055…	chrX:9431105-9687780 (+) // 97.47 // p22.31
11723347_a_at	0.140908	-0.140908	-1.21572	-0.281816	1.21572	down	MTERFD1	51001	0006351 // transcription, DNA-dependent // inferred from electronic annotation /// 0006355 // regulation of transcription, DNA-dependent // inferred from electronic annotation /// 0045892 // negative regulation of transcription, DNA-dependent // inferred from mutant phenotype /// 0045892 // negative regulation of transcription, DNA-dependent // inferred from electronic annotation	0005739 // mitochondrion // inferred from direct assay /// 0005739 // mitochondrion // inferred from electronic annotation	0003677 // DNA binding // inferred from electronic annotation /// 0044212 // transcription regulatory region DNA binding // inferred from direct assay	chr8:97251648-97273828 (-) // 88.33 // q22.1
11738156_a_at	0.082273	-0.082273	-1.12081	-0.164546	1.12081	down	ZBTB26	57684	0006351 // transcription, DNA-dependent // inferred from electronic annotation /// 0006355 // regulation of transcription, DNA-dependent // inferred from electronic annotation	0005622 // intracellular // inferred from electronic annotation /// 0005634 // nucleus // inferred from electronic annotation	0003676 // nucleic acid binding // inferred from electronic annotation /// 0003677 // DNA binding // inferred from electronic annotation /// 0008270 // zinc ion binding // inferred from electronic annotation /// 0046872 // metal ion binding // inferred from electronic annotation	chr9:125680378-125693544 (-) // 95.61 // q33.2
11716129_at	-0.0448742	0.0448742	1.06418	0.0897484	1.06418	up	IGF2R	3482	0006810 // transport // inferred from electronic annotation /// 0006898 // receptor-mediated endocytosis // traceable author statement /// 0007165 // signal transduction // traceable author statement /// 0048009 // insulin-like growth factor receptor signaling pathway // traceable author statement	0005624 // membrane fraction // inferred from electronic annotation /// 0005634 // nucleus // inferred from electronic annotation /// 0005641 // nuclear envelope lumen // inferred from electronic annotation /// 0005737 // cytoplasm // inferred from electronic annotation /// 0005764 // lysosome // inferred from electronic annotation /// 0005765 // lysosomal membrane // inferred from electronic ann…	0001948 // glycoprotein binding // inferred from direct assay /// 0001948 // glycoprotein binding // inferred from electronic annotation /// 0004872 // receptor activity // traceable author statement /// 0004872 // receptor activity // inferred from electronic annotation /// 0005010 // insulin-like growth factor-activated receptor activity // traceable author statement /// 0005215 // transporter …	chr6:160390130-160527581 (+) // 98.1 // q25.3
11756882_a_at	0.0884237	-0.0884232	-1.13041	-0.176847	1.13041	down	RTTN	25914	0007275 // multicellular organismal development // inferred from electronic annotation /// 0007368 // determination of left/right symmetry // inferred from electronic annotation			chr18:67671044-67863889 (-) // 97.69 // q22.2
11755637_x_at	-0.0219183	0.0219183	1.03085	0.0438366	1.03085	up	ARHGEF10L	55160	0032321 // positive regulation of Rho GTPase activity // inferred from direct assay /// 0035023 // regulation of Rho protein signal transduction // inferred from electronic annotation /// 0035104 // positive regulation of transcription via sterol regulatory element binding // inferred from direct assay /// 0051496 // positive regulation of stress fiber assembly // inferred from direct assay	0005622 // intracellular // inferred from electronic annotation /// 0005737 // cytoplasm // inferred from electronic annotation /// 0005829 // cytosol // inferred from direct assay	0005085 // guanyl-nucleotide exchange factor activity // inferred from electronic annotation /// 0005089 // Rho guanyl-nucleotide exchange factor activity // inferred from electronic annotation /// 0005100 // Rho GTPase activator activity // inferred from direct assay	chr1:17941582-18024363 (+) // 89.68 // p36.13
11718996_at	-0.106108	0.106108	1.15847	0.212216	1.15847	up	MSRB2	22921	0006355 // regulation of transcription, DNA-dependent // traceable author statement /// 0030091 // protein repair // inferred from sequence or structural similarity /// 0030091 // protein repair // inferred from electronic annotation /// 0055114 // oxidation-reduction process // inferred from electronic annotation	0005739 // mitochondrion // inferred from sequence or structural similarity /// 0005739 // mitochondrion // inferred from electronic annotation	0000318 // protein-methionine-R-oxide reductase activity // inferred from sequence or structural similarity /// 0000318 // protein-methionine-R-oxide reductase activity // inferred from electronic annotation /// 0003700 // sequence-specific DNA binding transcription factor activity // traceable author statement /// 0008113 // peptide-methionine-(S)-S-oxide reductase activity // inferred from elec…	chr10:23384377-23411276 (+) // 57.95 // p12.2
11742377_at	0	0	-1	0	1	down	OR7C2	26658	0007165 // signal transduction // inferred from electronic annotation /// 0007186 // G-protein coupled receptor signaling pathway // inferred from electronic annotation /// 0007608 // sensory perception of smell // inferred from electronic annotation /// 0050896 // response to stimulus // inferred from electronic annotation /// 0050911 // detection of chemical stimulus involved in sensory percept…	0005886 // plasma membrane // traceable author statement /// 0005886 // plasma membrane // inferred from electronic annotation /// 0016020 // membrane // inferred from electronic annotation /// 0016021 // integral to membrane // inferred from electronic annotation	0004871 // signal transducer activity // inferred from electronic annotation /// 0004872 // receptor activity // inferred from electronic annotation /// 0004930 // G-protein coupled receptor activity // inferred from electronic annotation /// 0004984 // olfactory receptor activity // inferred from electronic annotation	chr19:15052300-15053260 (+) // 99.69 // p13.12
11736548_s_at	-0.076983	0.076983	1.11262	0.153966	1.11262	up	FANCD2	2177	0006281 // DNA repair // traceable author statement /// 0006281 // DNA repair // inferred from electronic annotation /// 0006974 // response to DNA damage stimulus // inferred from electronic annotation /// 0007049 // cell cycle // inferred from electronic annotation /// 0007129 // synapsis // inferred from electronic annotation /// 0007276 // gamete generation // inferred from electronic annotat…	0000793 // condensed chromosome // inferred from electronic annotation /// 0005634 // nucleus // inferred from electronic annotation /// 0005654 // nucleoplasm // traceable author statement	0005515 // protein binding // inferred from physical interaction	chr3:10068070-10141344 (+) // 93.96 // p25.3
11747866_a_at	0.0195818	-0.0195823	-1.02752	-0.0391641	1.02752	down	RBL2	5934	0000080 // G1 phase of mitotic cell cycle // traceable author statement /// 0000278 // mitotic cell cycle // traceable author statement /// 0006351 // transcription, DNA-dependent // inferred from electronic annotation /// 0006355 // regulation of transcription, DNA-dependent // inferred from electronic annotation /// 0007049 // cell cycle // inferred from electronic annotation /// 0016568 // chr…	0000785 // chromatin // inferred from electronic annotation /// 0005634 // nucleus // inferred from direct assay /// 0005634 // nucleus // inferred from electronic annotation /// 0005654 // nucleoplasm // traceable author statement /// 0005667 // transcription factor complex // inferred from electronic annotation /// 0005730 // nucleolus // inferred from direct assay /// 0005737 // cytoplasm // i…	0003677 // DNA binding // inferred from electronic annotation /// 0005515 // protein binding // inferred from physical interaction	chr16:53483880-53524532 (+) // 99.86 // q12.2
11719799_a_at	-0.0643101	0.0643101	1.09325	0.12862	1.09325	up	MBD4	8930	0006281 // DNA repair // traceable author statement /// 0006281 // DNA repair // inferred from electronic annotation /// 0006284 // base-excision repair // inferred from electronic annotation /// 0006284 // base-excision repair // traceable author statement /// 0006285 // base-excision repair, AP site formation // traceable author statement /// 0006974 // response to DNA damage stimulus // inferr…	0000785 // chromatin // inferred from electronic annotation /// 0005634 // nucleus // inferred from direct assay /// 0005634 // nucleus // inferred from electronic annotation /// 0005634 // nucleus // traceable author statement /// 0005654 // nucleoplasm // traceable author statement /// 0005730 // nucleolus // inferred from direct assay /// 0005737 // cytoplasm // inferred from electronic annota…	0003677 // DNA binding // inferred from electronic annotation /// 0003696 // satellite DNA binding // traceable author statement /// 0003824 // catalytic activity // inferred from electronic annotation /// 0004520 // endodeoxyribonuclease activity // traceable author statement /// 0005515 // protein binding // inferred from physical interaction /// 0016787 // hydrolase activity // inferred from e…	chr3:129149788-129159022 (-) // 86.25 // q21.3
11742511_a_at	-0.0135529	0.0135531	1.01897	0.027106	1.01897	up	IL4R	3566	0002532 // production of molecular mediator involved in inflammatory response // inferred from electronic annotation /// 0006955 // immune response // traceable author statement /// 0007165 // signal transduction // traceable author statement /// 0019221 // cytokine-mediated signaling pathway // inferred from electronic annotation /// 0030728 // ovulation // inferred from electronic annotation //…	0005576 // extracellular region // inferred from electronic annotation /// 0005615 // extracellular space // inferred from electronic annotation /// 0005886 // plasma membrane // inferred from electronic annotation /// 0005887 // integral to plasma membrane // traceable author statement /// 0016020 // membrane // inferred from electronic annotation /// 0016021 // integral to membrane // inferred …	0004872 // receptor activity // inferred from electronic annotation /// 0004896 // cytokine receptor activity // inferred from electronic annotation /// 0004913 // interleukin-4 receptor activity // traceable author statement /// 0005057 // receptor signaling protein activity // traceable author statement /// 0005515 // protein binding // inferred from physical interaction /// 0043560 // insulin …	chr16:27325250-27364017 (+) // 70.52 // p12.1
11741910_s_at	0.0148833	-0.0148833	-1.02085	-0.0297666	1.02085	down	PKNOX2	63876	0006355 // regulation of transcription, DNA-dependent // inferred from electronic annotation /// 0006357 // regulation of transcription from RNA polymerase II promoter // inferred from electronic annotation	0005634 // nucleus // inferred from electronic annotation /// 0005737 // cytoplasm // inferred from electronic annotation /// 0015629 // actin cytoskeleton // inferred from electronic annotation /// 0015630 // microtubule cytoskeleton // inferred from electronic annotation	0003677 // DNA binding // inferred from direct assay /// 0003677 // DNA binding // inferred from electronic annotation /// 0003700 // sequence-specific DNA binding transcription factor activity // inferred from electronic annotation /// 0003785 // actin monomer binding // inferred from electronic annotation /// 0043565 // sequence-specific DNA binding // inferred from electronic annotation /// 00…	chr11:125034558-125303282 (+) // 97.22 // q24.2
11759627_at	-0.216495	0.216495	1.35003	0.432989	1.35003	up	USP15	9958	0006508 // proteolysis // inferred from electronic annotation /// 0006511 // ubiquitin-dependent protein catabolic process // inferred from electronic annotation /// 0016579 // protein deubiquitination // inferred from direct assay		0003824 // catalytic activity // inferred from electronic annotation /// 0004197 // cysteine-type endopeptidase activity // traceable author statement /// 0004221 // ubiquitin thiolesterase activity // inferred from electronic annotation /// 0004843 // ubiquitin-specific protease activity // inferred from direct assay /// 0004843 // ubiquitin-specific protease activity // inferred from electronic…	chr12:62654160-62730474 (+) // 82.6 // q14.1
11718129_x_at	0.0633812	-0.0633812	-1.09184	-0.126762	1.09184	down	ARL2	402	0006184 // GTP catabolic process // inferred from mutant phenotype /// 0007021 // tubulin complex assembly // traceable author statement /// 0007049 // cell cycle // inferred from electronic annotation /// 0007264 // small GTPase mediated signal transduction // inferred from electronic annotation /// 0010811 // positive regulation of cell-substrate adhesion // inferred from sequence or structural…	0005622 // intracellular // inferred from electronic annotation /// 0005634 // nucleus // inferred from direct assay /// 0005634 // nucleus // inferred from electronic annotation /// 0005737 // cytoplasm // inferred from electronic annotation /// 0005739 // mitochondrion // inferred from electronic annotation /// 0005758 // mitochondrial intermembrane space // inferred from direct assay /// 00057…	0000166 // nucleotide binding // inferred from electronic annotation /// 0003924 // GTPase activity // inferred from mutant phenotype /// 0005095 // GTPase inhibitor activity // traceable author statement /// 0005515 // protein binding // inferred from physical interaction /// 0005525 // GTP binding // inferred from mutant phenotype /// 0005525 // GTP binding // inferred from electronic annotatio…	chr11:64781423-64789656 (+) // 95.24 // q13.1
11734958_s_at	0.142089	-0.142089	-1.21772	-0.284178	1.21772	down	C14orf135	64430		0016020 // membrane // inferred from electronic annotation /// 0016021 // integral to membrane // inferred from electronic annotation		chr14:60558544-60601530 (+) // 99.38 // q23.1
11759275_at	-0.163667	0.163667	1.25469	0.327334	1.25469	up	OR2M3	127062	0007165 // signal transduction // inferred from electronic annotation /// 0007186 // G-protein coupled receptor signaling pathway // inferred from electronic annotation /// 0007608 // sensory perception of smell // inferred from electronic annotation /// 0050896 // response to stimulus // inferred from electronic annotation /// 0050911 // detection of chemical stimulus involved in sensory percept…	0005886 // plasma membrane // traceable author statement /// 0005886 // plasma membrane // inferred from electronic annotation /// 0016020 // membrane // inferred from electronic annotation /// 0016021 // integral to membrane // inferred from electronic annotation	0004871 // signal transducer activity // inferred from electronic annotation /// 0004872 // receptor activity // inferred from electronic annotation /// 0004930 // G-protein coupled receptor activity // inferred from electronic annotation /// 0004984 // olfactory receptor activity // inferred from electronic annotation	chr1:248366331-248367393 (+) // 100.0 // q44
11745871_a_at	-0.176049	0.176049	1.27642	0.352098	1.27642	up	PAPOLA	10914	0000398 // nuclear mRNA splicing, via spliceosome // traceable author statement /// 0006351 // transcription, DNA-dependent // inferred from electronic annotation /// 0006366 // transcription from RNA polymerase II promoter // traceable author statement /// 0006369 // termination of RNA polymerase II transcription // traceable author statement /// 0006378 // mRNA polyadenylation // non-traceable …	0005634 // nucleus // inferred from direct assay /// 0005634 // nucleus // traceable author statement /// 0005634 // nucleus // inferred from electronic annotation /// 0005654 // nucleoplasm // traceable author statement /// 0005730 // nucleolus // inferred from direct assay /// 0005737 // cytoplasm // traceable author statement /// 0005737 // cytoplasm // inferred from electronic annotation	0000166 // nucleotide binding // inferred from electronic annotation /// 0000287 // magnesium ion binding // inferred from sequence or structural similarity /// 0003723 // RNA binding // non-traceable author statement /// 0003723 // RNA binding // inferred from electronic annotation /// 0004652 // polynucleotide adenylyltransferase activity // inferred from sequence or structural similarity /// 0…	chr14:96968770-97033420 (+) // 97.22 // q32.2
11734814_a_at	-0.26281	0.26281	1.43955	0.52562	1.43955	up	PDE1A	5136	0000042 // protein targeting to Golgi // inferred from electronic annotation /// 0007165 // signal transduction // traceable author statement /// 0007165 // signal transduction // inferred from electronic annotation /// 0007173 // epidermal growth factor receptor signaling pathway // traceable author statement /// 0007202 // activation of phospholipase C activity // traceable author statement ///…	0005829 // cytosol // traceable author statement	0003824 // catalytic activity // inferred from electronic annotation /// 0004114 // 3',5'-cyclic-nucleotide phosphodiesterase activity // inferred from electronic annotation /// 0004117 // calmodulin-dependent cyclic-nucleotide phosphodiesterase activity // traceable author statement /// 0005516 // calmodulin binding // inferred from electronic annotation /// 0008081 // phosphoric diester hydrola…	chr2:183006903-183387425 (-) // 97.1 // q32.1
11722465_a_at	0.0555429	-0.0555429	-1.08004	-0.111086	1.08004	down	C17orf80	55028		0016020 // membrane // inferred from electronic annotation /// 0016021 // integral to membrane // inferred from electronic annotation		chr17:71228867-71245093 (+) // 98.03 // q25.1
11719993_x_at	0.083035	-0.083035	-1.122	-0.16607	1.122	down	NLK	51701	0000165 // MAPK cascade // inferred from sequence or structural similarity /// 0000165 // MAPK cascade // inferred from electronic annotation /// 0006351 // transcription, DNA-dependent // inferred from electronic annotation /// 0006355 // regulation of transcription, DNA-dependent // inferred from sequence or structural similarity /// 0006355 // regulation of transcription, DNA-dependent // infe…	0005634 // nucleus // inferred from sequence or structural similarity /// 0005634 // nucleus // inferred from electronic annotation /// 0005634 // nucleus // traceable author statement /// 0005737 // cytoplasm // inferred from electronic annotation	0000166 // nucleotide binding // inferred from electronic annotation /// 0000287 // magnesium ion binding // inferred from sequence or structural similarity /// 0000287 // magnesium ion binding // inferred from electronic annotation /// 0004672 // protein kinase activity // traceable author statement /// 0004672 // protein kinase activity // inferred from electronic annotation /// 0004674 // prot…	chr17:26368784-26523402 (+) // 91.63 // q11.2
11733607_a_at	-0.0353723	0.0353723	1.05026	0.0707445	1.05026	up	LRRC34	151827				chr3:169511268-169530312 (-) // 97.6 // q26.2
11721035_x_at	-0.036047	0.036047	1.05124	0.072094	1.05124	up	PPP1R3B	79660	0005975 // carbohydrate metabolic process // inferred from electronic annotation /// 0005977 // glycogen metabolic process // inferred from electronic annotation			chr8:8993764-9008220 (-) // 88.24 // p23.1
11742980_a_at	0.0276713	-0.0276713	-1.03911	-0.0553427	1.03911	down	ANKS1B	56899		0005634 // nucleus // inferred from electronic annotation /// 0005737 // cytoplasm // inferred from electronic annotation /// 0005886 // plasma membrane // inferred from electronic annotation /// 0014069 // postsynaptic density // inferred from electronic annotation /// 0015030 // Cajal body // inferred from electronic annotation /// 0016020 // membrane // inferred from electronic annotation /// …	0046875 // ephrin receptor binding // inferred from physical interaction	chr12:99137995-99548542 (-) // 97.01 // q23.1
11717748_x_at	-0.103585	0.103585	1.15442	0.20717	1.15442	up	MCTS1	28985	0006351 // transcription, DNA-dependent // inferred from electronic annotation /// 0006355 // regulation of transcription, DNA-dependent // inferred from electronic annotation /// 0006974 // response to DNA damage stimulus // inferred from electronic annotation /// 0007049 // cell cycle // inferred from electronic annotation /// 0008284 // positive regulation of cell proliferation // traceable au…	0005737 // cytoplasm // inferred from electronic annotation	0003723 // RNA binding // inferred from electronic annotation	chrX:119737687-119755014 (+) // 74.21 // q24
11742257_a_at	0	0	-1	0	1	down	PTGER3	5733	0001660 // fever generation // inferred from electronic annotation /// 0006351 // transcription, DNA-dependent // traceable author statement /// 0007165 // signal transduction // inferred from electronic annotation /// 0007186 // G-protein coupled receptor signaling pathway // traceable author statement /// 0007186 // G-protein coupled receptor signaling pathway // inferred from electronic annota…	0005635 // nuclear envelope // traceable author statement /// 0005886 // plasma membrane // traceable author statement /// 0005886 // plasma membrane // inferred from electronic annotation /// 0005887 // integral to plasma membrane // traceable author statement /// 0016020 // membrane // inferred from electronic annotation /// 0016021 // integral to membrane // inferred from electronic annotation…	0004871 // signal transducer activity // inferred from electronic annotation /// 0004872 // receptor activity // inferred from electronic annotation /// 0004879 // ligand-activated sequence-specific DNA binding RNA polymerase II transcription factor activity // traceable author statement /// 0004930 // G-protein coupled receptor activity // inferred from electronic annotation /// 0004955 // prost…	chr1:71418114-71513491 (-) // 92.12 // p31.1
11752824_a_at	0	0	-1	0	1	down	C17orf61-PLSCR3 /// PLSCR3	100529211 /// 57048	0017121 // phospholipid scrambling // non-traceable author statement /// 0042593 // glucose homeostasis // inferred from electronic annotation /// 0042632 // cholesterol homeostasis // inferred from electronic annotation /// 0071222 // cellular response to lipopolysaccharide // inferred from electronic annotation	0005886 // plasma membrane // inferred from direct assay /// 0005886 // plasma membrane // non-traceable author statement /// 0016020 // membrane // inferred from electronic annotation /// 0016021 // integral to membrane // inferred from electronic annotation	0005509 // calcium ion binding // non-traceable author statement /// 0005515 // protein binding // inferred from physical interaction /// 0017124 // SH3 domain binding // inferred from electronic annotation /// 0017128 // phospholipid scramblase activity // non-traceable author statement /// 0048306 // calcium-dependent protein binding // inferred from physical interaction	chr17:7293535-7307414 (-) // 97.7 // p13.1
11751321_a_at	0.113832	-0.113832	-1.17094	-0.227663	1.17094	down	CRIM1	51232	0001558 // regulation of cell growth // inferred from electronic annotation /// 0007399 // nervous system development // traceable author statement /// 0043086 // negative regulation of catalytic activity // inferred from electronic annotation /// 0048009 // insulin-like growth factor receptor signaling pathway // traceable author statement	0005576 // extracellular region // inferred from electronic annotation /// 0005886 // plasma membrane // inferred from electronic annotation /// 0016020 // membrane // inferred from electronic annotation /// 0016021 // integral to membrane // inferred from electronic annotation /// 0016021 // integral to membrane // traceable author statement	0004857 // enzyme inhibitor activity // inferred from electronic annotation /// 0004867 // serine-type endopeptidase inhibitor activity // inferred from electronic annotation /// 0005010 // insulin-like growth factor-activated receptor activity // traceable author statement /// 0005520 // insulin-like growth factor binding // inferred from electronic annotation	chr2:36744515-36776110 (+) // 88.26 // p22.2
11756118_s_at	0.0895691	-0.0895691	-1.13221	-0.179138	1.13221	down	MLL5	55904	0002446 // neutrophil mediated immunity // inferred from sequence or structural similarity /// 0002446 // neutrophil mediated immunity // inferred from electronic annotation /// 0006306 // DNA methylation // inferred from sequence or structural similarity /// 0006306 // DNA methylation // inferred from electronic annotation /// 0006351 // transcription, DNA-dependent // inferred from electronic a…	0005634 // nucleus // inferred from electronic annotation /// 0016607 // nuclear speck // inferred from electronic annotation /// 0070688 // MLL5-L complex // inferred from direct assay	0003713 // transcription coactivator activity // inferred from mutant phenotype /// 0005515 // protein binding // inferred from physical interaction /// 0008168 // methyltransferase activity // inferred from electronic annotation /// 0008270 // zinc ion binding // inferred from electronic annotation /// 0016740 // transferase activity // inferred from electronic annotation /// 0018024 // histone-…	chr7:104753404-104754527 (+) // 99.05 // q22.3
11728751_a_at	-0.0108895	0.0108891	1.01521	0.0217786	1.01521	up	OSBP	5007	0006810 // transport // inferred from electronic annotation /// 0006869 // lipid transport // inferred from electronic annotation	0000139 // Golgi membrane // inferred from electronic annotation /// 0005737 // cytoplasm // inferred from electronic annotation /// 0005794 // Golgi apparatus // inferred from electronic annotation /// 0016020 // membrane // inferred from electronic annotation	0005543 // phospholipid binding // inferred from electronic annotation /// 0008142 // oxysterol binding // traceable author statement /// 0008289 // lipid binding // inferred from electronic annotation	chr11:59341871-59383617 (-) // 94.22 // q12.1
11715402_x_at	0.0737209	-0.0737209	-1.1076	-0.147442	1.1076	down	ILF2	3608	0006351 // transcription, DNA-dependent // inferred from direct assay /// 0006351 // transcription, DNA-dependent // inferred from electronic annotation /// 0006355 // regulation of transcription, DNA-dependent // inferred from electronic annotation /// 0006955 // immune response // inferred from electronic annotation /// 0045893 // positive regulation of transcription, DNA-dependent // inferred …	0005634 // nucleus // inferred from direct assay /// 0005634 // nucleus // inferred from electronic annotation /// 0005730 // nucleolus // inferred from direct assay /// 0005730 // nucleolus // inferred from electronic annotation /// 0005737 // cytoplasm // inferred from electronic annotation /// 0030529 // ribonucleoprotein complex // inferred from direct assay	0003677 // DNA binding // inferred from direct assay /// 0003677 // DNA binding // inferred from electronic annotation /// 0003723 // RNA binding // inferred from electronic annotation /// 0003725 // double-stranded RNA binding // inferred from direct assay /// 0005515 // protein binding // inferred from physical interaction /// 0005524 // ATP binding // inferred from electronic annotation /// 00…	chr1:153634263-153643471 (-) // 64.49 // q21.3
11760528_at	0.0276713	-0.0276716	-1.03911	-0.0553429	1.03911	down	RDM1	201299	0006281 // DNA repair // inferred from electronic annotation /// 0006310 // DNA recombination // inferred from electronic annotation	0005634 // nucleus // inferred from electronic annotation /// 0005730 // nucleolus // inferred from direct assay /// 0005730 // nucleolus // inferred from electronic annotation /// 0005737 // cytoplasm // inferred from direct assay /// 0005737 // cytoplasm // inferred from electronic annotation /// 0015030 // Cajal body // inferred from electronic annotation /// 0016605 // PML body // inferred fr…	0000166 // nucleotide binding // inferred from electronic annotation /// 0003676 // nucleic acid binding // inferred from electronic annotation /// 0003677 // DNA binding // inferred from electronic annotation /// 0003723 // RNA binding // inferred from electronic annotation	chr17:34249158-34257770 (-) // 85.03 // q12
11744420_at	0.0107107	-0.0107107	-1.01496	-0.0214214	1.01496	down	MIR600 /// MIR600HG	693185 /// 81571				chr9:125871772-125877756 (-) // 95.55 // q33.3
11761323_at	-0.269876	0.269876	1.45372	0.539752	1.45372	up	COMMD9	29099				chr11:36296052-36310976 (-) // 89.17 // p13
11744583_s_at	-0.0236111	0.0236111	1.03327	0.0472221	1.03327	up	AMDHD2 /// CEMP1	51005 /// 752014	0005975 // carbohydrate metabolic process // inferred from electronic annotation /// 0006044 // N-acetylglucosamine metabolic process // inferred from electronic annotation	0005737 // cytoplasm // inferred from electronic annotation	0008448 // N-acetylglucosamine-6-phosphate deacetylase activity // inferred from electronic annotation /// 0016787 // hydrolase activity // inferred from electronic annotation /// 0016810 // hydrolase activity, acting on carbon-nitrogen (but not peptide) bonds // inferred from electronic annotation	chr16:2570365-2579732 (+) // 99.19 // p13.3
11758184_x_at	0.0703116	-0.0703116	-1.10238	-0.140623	1.10238	down	KRT8	3856	0007010 // cytoskeleton organization // non-traceable author statement /// 0044419 // interspecies interaction between organisms // inferred from electronic annotation	0005634 // nucleus // inferred from electronic annotation /// 0005654 // nucleoplasm // inferred from electronic annotation /// 0005737 // cytoplasm // inferred from direct assay /// 0005737 // cytoplasm // inferred from electronic annotation /// 0005882 // intermediate filament // non-traceable author statement /// 0005882 // intermediate filament // inferred from electronic annotation /// 00163…	0005198 // structural molecule activity // non-traceable author statement /// 0005198 // structural molecule activity // inferred from electronic annotation /// 0005515 // protein binding // inferred from physical interaction	chr12:53293746-53298821 (-) // 86.05 // q13.13
11725061_a_at	-0.0361166	0.0361171	1.05134	0.0722337	1.05134	up	USP7	7874	0006281 // DNA repair // inferred from electronic annotation /// 0006283 // transcription-coupled nucleotide-excision repair // inferred from mutant phenotype /// 0006508 // proteolysis // inferred from electronic annotation /// 0006511 // ubiquitin-dependent protein catabolic process // inferred from electronic annotation /// 0006917 // induction of apoptosis // inferred from electronic annotati…	0005634 // nucleus // inferred from direct assay /// 0005634 // nucleus // inferred from electronic annotation /// 0005634 // nucleus // traceable author statement /// 0005737 // cytoplasm // inferred from electronic annotation /// 0005829 // cytosol // inferred from direct assay /// 0016605 // PML body // inferred from electronic annotation	0002039 // p53 binding // inferred from direct assay /// 0004197 // cysteine-type endopeptidase activity // traceable author statement /// 0004221 // ubiquitin thiolesterase activity // inferred from mutant phenotype /// 0004221 // ubiquitin thiolesterase activity // inferred from electronic annotation /// 0004843 // ubiquitin-specific protease activity // inferred from direct assay /// 0004843 /…	chr16:8985953-9057341 (-) // 95.32 // p13.2
11751316_x_at	-0.0112972	0.0112972	1.01578	0.0225945	1.01578	up	EPS8L1	54869	0016310 // phosphorylation // inferred from electronic annotation	0005737 // cytoplasm // inferred from electronic annotation	0004872 // receptor activity // inferred from electronic annotation /// 0016301 // kinase activity // inferred from electronic annotation	chr19:55591759-55599057 (+) // 97.73 // q13.42
11719866_at	-0.00927353	0.00927353	1.01294	0.0185471	1.01294	up	SVEP1	79987	0007155 // cell adhesion // inferred from electronic annotation	0005576 // extracellular region // inferred from electronic annotation /// 0005737 // cytoplasm // inferred from electronic annotation /// 0005737 // cytoplasm // inferred from direct assay /// 0016020 // membrane // inferred from electronic annotation	0005509 // calcium ion binding // inferred from electronic annotation	chr9:113127527-113342160 (-) // 98.99 // q31.3
11747376_s_at	0.040514	-0.0405135	-1.05777	-0.0810275	1.05777	down	CCPG1	9236	0007049 // cell cycle // inferred from electronic annotation /// 0045944 // positive regulation of transcription from RNA polymerase II promoter // inferred from electronic annotation /// 2001106 // regulation of Rho guanyl-nucleotide exchange factor activity // inferred from electronic annotation	0016020 // membrane // inferred from electronic annotation /// 0016021 // integral to membrane // inferred from electronic annotation		chr15:55651043-55665781 (-) // 91.73 // q21.3
11740760_at	0.0185671	-0.0185671	-1.02607	-0.0371342	1.02607	down	TRPA1	8989	0006810 // transport // inferred from electronic annotation /// 0006811 // ion transport // traceable author statement /// 0006811 // ion transport // inferred from electronic annotation /// 0006816 // calcium ion transport // inferred from electronic annotation /// 0009409 // response to cold // inferred from electronic annotation /// 0042493 // response to drug // inferred from electronic annot…	0005887 // integral to plasma membrane // traceable author statement /// 0016020 // membrane // inferred from electronic annotation /// 0016021 // integral to membrane // inferred from electronic annotation /// 0032421 // stereocilium bundle // inferred from electronic annotation	0005216 // ion channel activity // inferred from electronic annotation /// 0005262 // calcium channel activity // inferred from electronic annotation /// 0015267 // channel activity // traceable author statement /// 0015267 // channel activity // inferred from electronic annotation	chr8:72933485-72987852 (-) // 95.44 // q13.3
11719788_s_at	-0.235301	0.235301	1.38569	0.470602	1.38569	up	TUBB2A	7280	0006184 // GTP catabolic process // inferred from electronic annotation /// 0006457 // protein folding // traceable author statement /// 0007017 // microtubule-based process // inferred from electronic annotation /// 0007018 // microtubule-based movement // inferred from electronic annotation /// 0007067 // mitosis // inferred from electronic annotation /// 0030182 // neuron differentiation // in…	0005737 // cytoplasm // inferred from electronic annotation /// 0005856 // cytoskeleton // inferred from electronic annotation /// 0005874 // microtubule // inferred from direct assay /// 0005874 // microtubule // inferred from electronic annotation /// 0043234 // protein complex // inferred from electronic annotation	0000166 // nucleotide binding // inferred from electronic annotation /// 0003924 // GTPase activity // inferred from electronic annotation /// 0005198 // structural molecule activity // inferred from electronic annotation /// 0005525 // GTP binding // inferred from electronic annotation /// 0042277 // peptide binding // inferred from electronic annotation	chr6:3153911-3157809 (-) // 96.98 // p25.2
11751189_x_at	-0.106108	0.106108	1.15847	0.212216	1.15847	up	RIMS1	22999	0006461 // protein complex assembly // inferred from direct assay /// 0006810 // transport // inferred from electronic annotation /// 0006836 // neurotransmitter transport // inferred from electronic annotation /// 0006886 // intracellular protein transport // inferred from electronic annotation /// 0006887 // exocytosis // inferred from electronic annotation /// 0006944 // cellular membrane fusi…	0005622 // intracellular // inferred from electronic annotation /// 0005886 // plasma membrane // traceable author statement /// 0005886 // plasma membrane // inferred from electronic annotation /// 0016020 // membrane // inferred from electronic annotation /// 0030054 // cell junction // inferred from electronic annotation /// 0042734 // presynaptic membrane // inferred from sequence or structur…	0005083 // small GTPase regulator activity // traceable author statement /// 0005515 // protein binding // inferred from physical interaction /// 0017137 // Rab GTPase binding // inferred from electronic annotation /// 0046872 // metal ion binding // inferred from electronic annotation	chr6:72970401-73110962 (+) // 92.33 // q13
11748164_a_at	0.147578	-0.147578	-1.22702	-0.295156	1.22702	down	VCAN	1462	0007155 // cell adhesion // inferred from electronic annotation /// 0007155 // cell adhesion // traceable author statement /// 0007275 // multicellular organismal development // traceable author statement /// 0007507 // heart development // inferred from electronic annotation /// 0008037 // cell recognition // traceable author statement /// 0008347 // glial cell migration // inferred from direct …	0005576 // extracellular region // inferred from electronic annotation /// 0005578 // proteinaceous extracellular matrix // inferred from electronic annotation /// 0005578 // proteinaceous extracellular matrix // traceable author statement /// 0005615 // extracellular space // inferred from direct assay /// 0031012 // extracellular matrix // inferred from direct assay /// 0031012 // extracellular…	0005509 // calcium ion binding // inferred from electronic annotation /// 0005539 // glycosaminoglycan binding // traceable author statement /// 0005540 // hyaluronic acid binding // inferred from electronic annotation /// 0005540 // hyaluronic acid binding // traceable author statement /// 0030246 // carbohydrate binding // inferred from electronic annotation	chr5:82767582-82876981 (+) // 99.9 // q14.2
11721203_at	-0.0417235	0.0417233	1.05955	0.0834467	1.05955	up	SCARF2	91179	0007155 // cell adhesion // inferred from electronic annotation	0016020 // membrane // inferred from electronic annotation /// 0016021 // integral to membrane // inferred from electronic annotation	0004872 // receptor activity // inferred from electronic annotation /// 0005515 // protein binding // inferred from physical interaction	chr22:20778873-20792146 (-) // 91.56 // q11.21
11735804_x_at	0.028574	-0.028574	-1.04041	-0.057148	1.04041	down	NAT6	24142		0005737 // cytoplasm // inferred from direct assay /// 0005737 // cytoplasm // inferred from electronic annotation /// 0005739 // mitochondrion // inferred from direct assay	0008080 // N-acetyltransferase activity // inferred from electronic annotation /// 0016740 // transferase activity // inferred from electronic annotation /// 0016746 // transferase activity, transferring acyl groups // inferred from electronic annotation	chr3:50333833-50336847 (-) // 98.23 // p21.31
11719412_at	0.277723	-0.277723	-1.46962	-0.555446	1.46962	down	PBX1	5087	0001655 // urogenital system development // inferred from electronic annotation /// 0001658 // branching involved in ureteric bud morphogenesis // inferred from electronic annotation /// 0006351 // transcription, DNA-dependent // inferred from electronic annotation /// 0006355 // regulation of transcription, DNA-dependent // non-traceable author statement /// 0006355 // regulation of transcriptio…	0005634 // nucleus // inferred from direct assay /// 0005634 // nucleus // inferred from electronic annotation /// 0005667 // transcription factor complex // inferred from electronic annotation /// 0005730 // nucleolus // inferred from direct assay /// 0005737 // cytoplasm // inferred from direct assay /// 0005737 // cytoplasm // inferred from electronic annotation	0003677 // DNA binding // inferred from direct assay /// 0003677 // DNA binding // inferred from electronic annotation /// 0003700 // sequence-specific DNA binding transcription factor activity // inferred from electronic annotation /// 0003700 // sequence-specific DNA binding transcription factor activity // non-traceable author statement /// 0005515 // protein binding // inferred from physical …	chr1:164528434-164821067 (+) // 94.97 // q23.3
11726441_a_at	-0.00911093	0.00911093	1.01271	0.0182219	1.01271	up	ERCC6L	54821	0000087 // M phase of mitotic cell cycle // traceable author statement /// 0000236 // mitotic prometaphase // traceable author statement /// 0000278 // mitotic cell cycle // traceable author statement /// 0007049 // cell cycle // inferred from electronic annotation /// 0007067 // mitosis // inferred from electronic annotation /// 0051301 // cell division // inferred from electronic annotation	0000775 // chromosome, centromeric region // inferred from electronic annotation /// 0000776 // kinetochore // inferred from electronic annotation /// 0000777 // condensed chromosome kinetochore // inferred from electronic annotation /// 0005694 // chromosome // inferred from electronic annotation /// 0005829 // cytosol // traceable author statement	0000166 // nucleotide binding // inferred from electronic annotation /// 0003676 // nucleic acid binding // inferred from electronic annotation /// 0003677 // DNA binding // inferred from electronic annotation /// 0004386 // helicase activity // inferred from electronic annotation /// 0005524 // ATP binding // inferred from electronic annotation /// 0016787 // hydrolase activity // inferred from …	chrX:71424514-71458897 (-) // 98.01 // q13.1
11761498_at	-0.16685	0.16685	1.26024	0.3337	1.26024	up	FAM129C	199786			0005543 // phospholipid binding // inferred from electronic annotation	chr19:17634109-17660620 (+) // 99.07 // p13.11
11761732_at	0.0321565	-0.0321565	-1.04559	-0.0643129	1.04559	down	PILRA	29992	0007165 // signal transduction // inferred from direct assay /// 0044419 // interspecies interaction between organisms // inferred from electronic annotation	0005576 // extracellular region // inferred from electronic annotation /// 0005886 // plasma membrane // inferred from electronic annotation /// 0016020 // membrane // inferred from electronic annotation /// 0016021 // integral to membrane // inferred from electronic annotation	0004872 // receptor activity // inferred from electronic annotation /// 0005515 // protein binding // inferred from physical interaction	chr7:99971150-99972732 (+) // 99.92 // q22.1
11762481_at	-0.0627952	0.0627947	1.09095	0.12559	1.09095	up	LAMB4	22798	0007155 // cell adhesion // inferred from electronic annotation	0005576 // extracellular region // inferred from electronic annotation /// 0005578 // proteinaceous extracellular matrix // inferred from electronic annotation /// 0005604 // basement membrane // inferred from electronic annotation		chr7:107715982-107763640 (-) // 86.92 // q31.1
11722116_a_at	0.174864	-0.174863	-1.27432	-0.349727	1.27432	down	RARB	5915	0000122 // negative regulation of transcription from RNA polymerase II promoter // inferred from electronic annotation /// 0001657 // ureteric bud development // inferred from electronic annotation /// 0003417 // growth plate cartilage development // inferred from electronic annotation /// 0006351 // transcription, DNA-dependent // inferred from electronic annotation /// 0006355 // regulation of …	0005634 // nucleus // inferred from direct assay /// 0005634 // nucleus // inferred from electronic annotation /// 0005654 // nucleoplasm // traceable author statement /// 0005737 // cytoplasm // inferred from electronic annotation	0003677 // DNA binding // traceable author statement /// 0003677 // DNA binding // inferred from electronic annotation /// 0003700 // sequence-specific DNA binding transcription factor activity // inferred from electronic annotation /// 0003707 // steroid hormone receptor activity // inferred from electronic annotation /// 0003708 // retinoic acid receptor activity // inferred from electronic ann…	chr3:25469009-25639423 (+) // 95.75 // p24.2
11737598_a_at	0.167184	-0.167183	-1.26082	-0.334367	1.26082	down	C17orf67	339210		0005576 // extracellular region // inferred from electronic annotation		chr17:54869274-54911256 (-) // 82.48 // q22
11728523_a_at	-0.0488181	0.0488181	1.07002	0.0976362	1.07002	up	MYCL1	4610	0006355 // regulation of transcription, DNA-dependent // non-traceable author statement /// 0006355 // regulation of transcription, DNA-dependent // inferred from electronic annotation	0005634 // nucleus // non-traceable author statement /// 0005634 // nucleus // inferred from electronic annotation	0003677 // DNA binding // non-traceable author statement /// 0003677 // DNA binding // traceable author statement /// 0003677 // DNA binding // inferred from electronic annotation /// 0003700 // sequence-specific DNA binding transcription factor activity // non-traceable author statement /// 0003700 // sequence-specific DNA binding transcription factor activity // inferred from electronic annotat…	chr1:40361099-40367687 (-) // 97.97 // p34.2
11728439_at	0.0419896	-0.0419898	-1.05994	-0.0839794	1.05994	down	BRWD1	54014	0006351 // transcription, DNA-dependent // inferred from electronic annotation /// 0006355 // regulation of transcription, DNA-dependent // inferred from electronic annotation /// 0006357 // regulation of transcription from RNA polymerase II promoter // inferred from electronic annotation /// 0007010 // cytoskeleton organization // inferred from mutant phenotype /// 0008360 // regulation of cell …	0005634 // nucleus // inferred from direct assay /// 0005634 // nucleus // inferred from electronic annotation /// 0005730 // nucleolus // inferred from direct assay /// 0005737 // cytoplasm // inferred from direct assay /// 0005737 // cytoplasm // inferred from electronic annotation		chr21:40557818-40685556 (-) // 98.43 // q22.2
11750366_a_at	-0.0649176	0.0649176	1.09417	0.129835	1.09417	up	EPHA6	285220	0006468 // protein phosphorylation // inferred from electronic annotation /// 0007169 // transmembrane receptor protein tyrosine kinase signaling pathway // inferred from electronic annotation /// 0016310 // phosphorylation // inferred from electronic annotation /// 0048013 // ephrin receptor signaling pathway // inferred from electronic annotation	0005887 // integral to plasma membrane // inferred from electronic annotation /// 0016020 // membrane // inferred from electronic annotation /// 0016021 // integral to membrane // inferred from electronic annotation	0000166 // nucleotide binding // inferred from electronic annotation /// 0004672 // protein kinase activity // inferred from electronic annotation /// 0004713 // protein tyrosine kinase activity // inferred from electronic annotation /// 0004714 // transmembrane receptor protein tyrosine kinase activity // inferred from electronic annotation /// 0004872 // receptor activity // inferred from elect…	chr3:97158434-97356907 (+) // 95.38 // q11.2
11760384_at	-0.0709844	0.0709844	1.10341	0.141969	1.10341	up	PPP2R5C	5527	0006977 // DNA damage response, signal transduction by p53 class mediator resulting in cell cycle arrest // inferred from direct assay /// 0007165 // signal transduction // inferred from electronic annotation /// 0007165 // signal transduction // non-traceable author statement /// 0008285 // negative regulation of cell proliferation // inferred from direct assay /// 0016485 // protein processing …	0000159 // protein phosphatase type 2A complex // inferred from direct assay /// 0000159 // protein phosphatase type 2A complex // inferred from electronic annotation /// 0000159 // protein phosphatase type 2A complex // non-traceable author statement /// 0000775 // chromosome, centromeric region // inferred from direct assay /// 0000775 // chromosome, centromeric region // inferred from electron…	0005515 // protein binding // inferred from physical interaction /// 0008233 // peptidase activity // inferred from direct assay /// 0008601 // protein phosphatase type 2A regulator activity // inferred from direct assay /// 0008601 // protein phosphatase type 2A regulator activity // inferred from electronic annotation /// 0008601 // protein phosphatase type 2A regulator activity // non-traceabl…	chr14:102276167-102349570 (+) // 99.53 // q32.31
11737444_a_at	0	0	-1	0	1	down	GPR156	165829	0007165 // signal transduction // inferred from electronic annotation /// 0007186 // G-protein coupled receptor signaling pathway // inferred from electronic annotation	0005886 // plasma membrane // inferred from electronic annotation /// 0016020 // membrane // inferred from electronic annotation /// 0016021 // integral to membrane // inferred from electronic annotation	0004871 // signal transducer activity // inferred from electronic annotation /// 0004872 // receptor activity // inferred from electronic annotation /// 0004930 // G-protein coupled receptor activity // inferred from electronic annotation /// 0004965 // G-protein coupled GABA receptor activity // inferred from electronic annotation	chr3:119885676-120004242 (-) // 97.27 // q13.33
11723152_a_at	-0.135605	0.135605	1.20682	0.27121	1.20682	up	GON4L	54856	0006355 // regulation of transcription, DNA-dependent // inferred from electronic annotation	0005634 // nucleus // inferred from direct assay /// 0005634 // nucleus // inferred from electronic annotation /// 0005730 // nucleolus // inferred from direct assay /// 0005737 // cytoplasm // inferred from direct assay	0003677 // DNA binding // inferred from electronic annotation	chr1:155719507-155823598 (-) // 96.24 // q22
11750968_x_at	-0.0283947	0.0283947	1.04015	0.0567894	1.04015	up	NFIC	4782	0000122 // negative regulation of transcription from RNA polymerase II promoter // inferred from direct assay /// 0000122 // negative regulation of transcription from RNA polymerase II promoter // inferred from genetic interaction /// 0006260 // DNA replication // inferred from electronic annotation /// 0006351 // transcription, DNA-dependent // inferred from electronic annotation /// 0006355 // …	0005622 // intracellular // inferred from electronic annotation /// 0005634 // nucleus // inferred from electronic annotation	0003677 // DNA binding // inferred from electronic annotation /// 0003700 // sequence-specific DNA binding transcription factor activity // inferred from direct assay /// 0003700 // sequence-specific DNA binding transcription factor activity // inferred from electronic annotation /// 0003700 // sequence-specific DNA binding transcription factor activity // traceable author statement	chr19:3381708-3463140 (+) // 92.67 // p13.3
11741727_a_at	0.16613	-0.16613	-1.25898	-0.33226	1.25898	down	NEDD1	121441	0000086 // G2/M transition of mitotic cell cycle // traceable author statement /// 0000278 // mitotic cell cycle // traceable author statement /// 0007049 // cell cycle // inferred from electronic annotation /// 0007067 // mitosis // inferred from electronic annotation /// 0051301 // cell division // inferred from electronic annotation	0000242 // pericentriolar material // inferred from electronic annotation /// 0000922 // spindle pole // inferred from electronic annotation /// 0005737 // cytoplasm // inferred from electronic annotation /// 0005813 // centrosome // inferred from direct assay /// 0005813 // centrosome // inferred from electronic annotation /// 0005814 // centriole // inferred from electronic annotation /// 00058…		chr12:97301243-97347461 (+) // 97.93 // q23.1
11754840_s_at	0.0295205	-0.0295205	-1.04177	-0.059041	1.04177	down	LINC00470	56651				chr18:1268311-1276078 (-) // 58.43 // p11.32
11757267_x_at	0.0602679	-0.0602679	-1.08714	-0.120536	1.08714	down	SIRT2	22933	0000183 // chromatin silencing at rDNA // non-traceable author statement /// 0006342 // chromatin silencing // non-traceable author statement /// 0006348 // chromatin silencing at telomere // non-traceable author statement /// 0006471 // protein ADP-ribosylation // non-traceable author statement /// 0006471 // protein ADP-ribosylation // traceable author statement /// 0006476 // protein deacetyla…	0005677 // chromatin silencing complex // non-traceable author statement /// 0005737 // cytoplasm // inferred from direct assay /// 0005737 // cytoplasm // inferred from electronic annotation /// 0005856 // cytoskeleton // inferred from electronic annotation /// 0005874 // microtubule // inferred from direct assay /// 0005874 // microtubule // inferred from electronic annotation	0003950 // NAD+ ADP-ribosyltransferase activity // traceable author statement /// 0005515 // protein binding // inferred from physical interaction /// 0008134 // transcription factor binding // inferred from physical interaction /// 0008270 // zinc ion binding // inferred from direct assay /// 0008270 // zinc ion binding // inferred from electronic annotation /// 0016787 // hydrolase activity // …	chr19:39369199-39369442 (-) // 35.79 // q13.2
11730333_at	0.142776	-0.142776	-1.21888	-0.285551	1.21888	down	DPYSL4	10570	0006208 // pyrimidine base catabolic process // inferred from electronic annotation /// 0007399 // nervous system development // traceable author statement /// 0007411 // axon guidance // traceable author statement	0005737 // cytoplasm // inferred from electronic annotation /// 0005829 // cytosol // traceable author statement	0016787 // hydrolase activity // inferred from electronic annotation /// 0016810 // hydrolase activity, acting on carbon-nitrogen (but not peptide) bonds // inferred from electronic annotation /// 0016812 // hydrolase activity, acting on carbon-nitrogen (but not peptide) bonds, in cyclic amides // inferred from electronic annotation	chr10:134000403-134019280 (+) // 97.43 // q26.3
11730717_x_at	-0.085093	0.085093	1.1252	0.170186	1.1252	up	PAGE5	90737				chrX:55246788-55250533 (+) // 87.59 // p11.21
11718361_at	0.0182858	-0.0182858	-1.02567	-0.0365715	1.02567	down	COIL	8161		0001674 // female germ cell nucleus // inferred from electronic annotation /// 0005634 // nucleus // traceable author statement /// 0005634 // nucleus // inferred from electronic annotation /// 0005654 // nucleoplasm // inferred from direct assay /// 0005730 // nucleolus // inferred from direct assay /// 0015030 // Cajal body // inferred from direct assay /// 0015030 // Cajal body // inferred fro…	0005515 // protein binding // inferred from physical interaction /// 0008022 // protein C-terminus binding // inferred from physical interaction /// 0015036 // disulfide oxidoreductase activity // inferred from electronic annotation /// 0042802 // identical protein binding // inferred from physical interaction	chr17:55015559-55038404 (-) // 97.19 // q22
11735219_at	0.0930095	-0.0930095	-1.13762	-0.186019	1.13762	down	COL10A1	1300	0001501 // skeletal system development // traceable author statement	0005576 // extracellular region // inferred from electronic annotation /// 0005578 // proteinaceous extracellular matrix // inferred from electronic annotation /// 0005581 // collagen // inferred from electronic annotation /// 0005581 // collagen // traceable author statement /// 0005938 // cell cortex // inferred from electronic annotation	0046872 // metal ion binding // inferred from electronic annotation	chr6:116440084-116447296 (-) // 97.71 // q22.1
11718052_a_at	-0.0386572	0.0386572	1.05505	0.0773144	1.05505	up	TBC1D23	55773	0032313 // regulation of Rab GTPase activity // inferred from electronic annotation /// 0032851 // positive regulation of Rab GTPase activity // inferred from electronic annotation	0005622 // intracellular // inferred from electronic annotation	0005097 // Rab GTPase activator activity // inferred from electronic annotation	chr3:99979660-100044095 (+) // 96.18 // q12.1
11749907_a_at	0.0820534	-0.0820534	-1.12047	-0.164107	1.12047	down	TRIM63	84676	0007165 // signal transduction // non-traceable author statement /// 0016567 // protein ubiquitination // inferred from electronic annotation /// 0043161 // proteasomal ubiquitin-dependent protein catabolic process // inferred from electronic annotation	0005622 // intracellular // inferred from electronic annotation /// 0005634 // nucleus // inferred from electronic annotation /// 0005737 // cytoplasm // inferred from direct assay /// 0005737 // cytoplasm // non-traceable author statement /// 0005737 // cytoplasm // inferred from electronic annotation /// 0005874 // microtubule // non-traceable author statement	0004842 // ubiquitin-protein ligase activity // inferred from electronic annotation /// 0004871 // signal transducer activity // non-traceable author statement /// 0008270 // zinc ion binding // inferred from electronic annotation /// 0016874 // ligase activity // inferred from electronic annotation /// 0031432 // titin binding // inferred from direct assay /// 0046872 // metal ion binding // inf…	chr1:26378141-26394121 (-) // 100.0 // p36.11
11739616_x_at	-0.152925	0.152925	1.23615	0.305849	1.23615	up	CD3EAP	10849	0007169 // transmembrane receptor protein tyrosine kinase signaling pathway // traceable author statement /// 0009303 // rRNA transcription // inferred from electronic annotation /// 0009303 // rRNA transcription // traceable author statement	0000120 // RNA polymerase I transcription factor complex // traceable author statement /// 0005634 // nucleus // inferred from direct assay /// 0005634 // nucleus // inferred from electronic annotation /// 0005694 // chromosome // inferred from electronic annotation /// 0005730 // nucleolus // inferred from direct assay /// 0005730 // nucleolus // inferred from electronic annotation /// 0005730 /…	0003899 // DNA-directed RNA polymerase activity // inferred from electronic annotation	chr19:45909386-45955388 (+) // 71.15 // q13.32
11737631_a_at	0.0397921	-0.0397921	-1.05671	-0.0795841	1.05671	down	SLC26A7	115111	0001696 // gastric acid secretion // inferred from electronic annotation /// 0006810 // transport // inferred from electronic annotation /// 0006811 // ion transport // traceable author statement /// 0006811 // ion transport // inferred from electronic annotation /// 0006820 // anion transport // inferred from electronic annotation /// 0006821 // chloride transport // inferred from direct assay /…	0005737 // cytoplasm // inferred from direct assay /// 0005768 // endosome // inferred from direct assay /// 0005768 // endosome // inferred from electronic annotation /// 0005886 // plasma membrane // traceable author statement /// 0016020 // membrane // inferred from electronic annotation /// 0016021 // integral to membrane // inferred from electronic annotation /// 0016323 // basolateral plasm…	0005253 // anion channel activity // inferred from electronic annotation /// 0005254 // chloride channel activity // inferred from direct assay /// 0005254 // chloride channel activity // inferred from electronic annotation /// 0015106 // bicarbonate transmembrane transporter activity // inferred from sequence or structural similarity /// 0015106 // bicarbonate transmembrane transporter activity …	chr8:92261515-92406946 (+) // 99.4 // q21.3
11723861_a_at	0.101425	-0.101425	-1.15097	-0.20285	1.15097	down	ATP8A1	10396	0006812 // cation transport // inferred from electronic annotation /// 0015914 // phospholipid transport // inferred from electronic annotation /// 0015917 // aminophospholipid transport // non-traceable author statement /// 0034220 // ion transmembrane transport // traceable author statement /// 0045332 // phospholipid translocation // non-traceable author statement /// 0055085 // transmembrane …	0005783 // endoplasmic reticulum // inferred from direct assay /// 0005783 // endoplasmic reticulum // inferred from electronic annotation /// 0005886 // plasma membrane // traceable author statement /// 0005886 // plasma membrane // inferred from electronic annotation /// 0016020 // membrane // inferred from electronic annotation /// 0016021 // integral to membrane // non-traceable author statem…	0000166 // nucleotide binding // inferred from electronic annotation /// 0000287 // magnesium ion binding // inferred from electronic annotation /// 0004012 // phospholipid-translocating ATPase activity // inferred from electronic annotation /// 0005515 // protein binding // inferred from physical interaction /// 0005524 // ATP binding // non-traceable author statement /// 0005524 // ATP binding …	chr4:42410393-42659122 (-) // 99.5 // p13
11733619_a_at	-0.0211923	0.0211926	1.02981	0.0423849	1.02981	up	ACVR1C	130399	0002021 // response to dietary excess // inferred from electronic annotation /// 0006468 // protein phosphorylation // inferred by curator /// 0006468 // protein phosphorylation // inferred from electronic annotation /// 0006915 // apoptotic process // inferred from electronic annotation /// 0007178 // transmembrane receptor protein serine/threonine kinase signaling pathway // inferred from elect…	0016020 // membrane // inferred from electronic annotation /// 0016021 // integral to membrane // inferred from electronic annotation /// 0048179 // activin receptor complex // inferred from direct assay	0000166 // nucleotide binding // inferred from electronic annotation /// 0004672 // protein kinase activity // inferred from electronic annotation /// 0004674 // protein serine/threonine kinase activity // inferred from electronic annotation /// 0004675 // transmembrane receptor protein serine/threonine kinase activity // inferred from electronic annotation /// 0004872 // receptor activity // inf…	chr2:158383279-158485517 (-) // 93.9 // q24.1
11716864_s_at	0.0146208	-0.0146208	-1.02048	-0.0292416	1.02048	down	NISCH	11188	0006006 // glucose metabolic process // inferred from electronic annotation /// 0006915 // apoptotic process // inferred from electronic annotation /// 0007154 // cell communication // inferred from electronic annotation /// 0008217 // regulation of blood pressure // inferred from electronic annotation /// 0016601 // Rac protein signal transduction // inferred from electronic annotation /// 00300…	0005624 // membrane fraction // inferred from electronic annotation /// 0005737 // cytoplasm // inferred from electronic annotation /// 0005768 // endosome // inferred from electronic annotation /// 0005769 // early endosome // inferred from electronic annotation /// 0005829 // cytosol // inferred from direct assay /// 0005829 // cytosol // inferred from electronic annotation /// 0005886 // plasm…	0004872 // receptor activity // inferred from electronic annotation /// 0005178 // integrin binding // inferred from electronic annotation /// 0008227 // G-protein coupled amine receptor activity // inferred from electronic annotation /// 0035091 // phosphatidylinositol binding // inferred from electronic annotation	chr3:52489518-52527084 (+) // 90.72 // p21.1
200062_PM_s_at	0.0437717	-0.0437727	-1.06256	-0.0875444	1.06256	down	RPL30	6156	0000184 // nuclear-transcribed mRNA catabolic process, nonsense-mediated decay // traceable author statement /// 0006412 // translation // non-traceable author statement /// 0006412 // translation // traceable author statement /// 0006412 // translation // inferred from electronic annotation /// 0006413 // translational initiation // traceable author statement /// 0006414 // translational elongat…	0005622 // intracellular // inferred from electronic annotation /// 0005737 // cytoplasm // inferred from direct assay /// 0005829 // cytosol // traceable author statement /// 0005840 // ribosome // inferred from electronic annotation /// 0022625 // cytosolic large ribosomal subunit // inferred from direct assay /// 0022625 // cytosolic large ribosomal subunit // traceable author statement /// 00…	0003723 // RNA binding // traceable author statement /// 0003735 // structural constituent of ribosome // non-traceable author statement /// 0003735 // structural constituent of ribosome // traceable author statement /// 0003735 // structural constituent of ribosome // inferred from electronic annotation	chr8:99053953-99057752 (-) // 98.74 // q22.2
11740326_x_at	-0.0594563	0.0594563	1.08592	0.118913	1.08592	up	SORBS2	8470		0005622 // intracellular // inferred from electronic annotation /// 0005634 // nucleus // non-traceable author statement /// 0005634 // nucleus // traceable author statement /// 0005737 // cytoplasm // inferred from electronic annotation /// 0015629 // actin cytoskeleton // traceable author statement /// 0030018 // Z disc // non-traceable author statement /// 0048471 // perinuclear region of cyto…	0005200 // structural constituent of cytoskeleton // traceable author statement /// 0008093 // cytoskeletal adaptor activity // traceable author statement /// 0008270 // zinc ion binding // inferred from electronic annotation /// 0008307 // structural constituent of muscle // traceable author statement	chr4:186506597-186697679 (-) // 93.63 // q35.1
11725830_a_at	0.0369658	-0.0369658	-1.05258	-0.0739317	1.05258	down	PLCL2	23228	0006629 // lipid metabolic process // inferred from electronic annotation /// 0007165 // signal transduction // inferred from electronic annotation /// 0035556 // intracellular signal transduction // inferred from electronic annotation	0005622 // intracellular // inferred from electronic annotation /// 0005737 // cytoplasm // inferred from electronic annotation	0004435 // phosphatidylinositol phospholipase C activity // inferred from electronic annotation /// 0004629 // phospholipase C activity // inferred from electronic annotation /// 0004871 // signal transducer activity // inferred from electronic annotation /// 0005509 // calcium ion binding // inferred from electronic annotation /// 0005543 // phospholipid binding // inferred from electronic annot…	chr3:16926451-17132090 (+) // 97.8 // p24.3
11726721_x_at	0.0516558	-0.0516558	-1.07424	-0.103312	1.07424	down	MPG	4350	0006281 // DNA repair // traceable author statement /// 0006281 // DNA repair // inferred from electronic annotation /// 0006284 // base-excision repair // inferred from electronic annotation /// 0006284 // base-excision repair // traceable author statement /// 0006285 // base-excision repair, AP site formation // traceable author statement /// 0006307 // DNA dealkylation involved in DNA repair /…	0005634 // nucleus // inferred from electronic annotation /// 0005654 // nucleoplasm // traceable author statement	0003677 // DNA binding // inferred from electronic annotation /// 0003684 // damaged DNA binding // traceable author statement /// 0003824 // catalytic activity // inferred from electronic annotation /// 0003905 // alkylbase DNA N-glycosylase activity // inferred from electronic annotation /// 0005515 // protein binding // inferred from physical interaction /// 0008725 // DNA-3-methyladenine glyc…	chr16:128168-135837 (+) // 86.65 // p13.3
11743357_a_at	-0.0680499	0.0680504	1.09893	0.1361	1.09893	up	ZBTB40	9923	0006351 // transcription, DNA-dependent // inferred from electronic annotation /// 0006355 // regulation of transcription, DNA-dependent // inferred from electronic annotation /// 0006974 // response to DNA damage stimulus // inferred from direct assay /// 0030282 // bone mineralization // non-traceable author statement	0005622 // intracellular // inferred from electronic annotation /// 0005634 // nucleus // inferred from direct assay /// 0005634 // nucleus // inferred from electronic annotation	0003676 // nucleic acid binding // inferred from electronic annotation /// 0003677 // DNA binding // inferred from electronic annotation /// 0008270 // zinc ion binding // inferred from electronic annotation /// 0046872 // metal ion binding // inferred from electronic annotation	chr1:22778343-22857647 (+) // 92.76 // p36.12
11758895_at	0.0247269	-0.0247269	-1.03487	-0.0494537	1.03487	down	EIF2S2	8894	0001701 // in utero embryonic development // inferred from electronic annotation /// 0002176 // male germ cell proliferation // inferred from electronic annotation /// 0006412 // translation // traceable author statement /// 0006412 // translation // inferred from electronic annotation /// 0006413 // translational initiation // inferred from direct assay /// 0006413 // translational initiation //…	0005829 // cytosol // traceable author statement /// 0005850 // eukaryotic translation initiation factor 2 complex // traceable author statement	0003723 // RNA binding // traceable author statement /// 0003743 // translation initiation factor activity // inferred from direct assay /// 0003743 // translation initiation factor activity // inferred from electronic annotation /// 0005515 // protein binding // inferred from physical interaction /// 0008135 // translation factor activity, nucleic acid binding // traceable author statement /// 0…	chr20:32676110-32700084 (-) // 79.39 // q11.22
11753852_a_at	-0.0527911	0.0527911	1.07593	0.105582	1.07593	up	NNAT	4826	0006810 // transport // traceable author statement /// 0007275 // multicellular organismal development // inferred from electronic annotation /// 0007420 // brain development // inferred from electronic annotation /// 0007420 // brain development // traceable author statement /// 0009249 // protein lipoylation // traceable author statement /// 0009749 // response to glucose stimulus // inferred f…	0005737 // cytoplasm // inferred from electronic annotation		chr20:36149733-36151159 (+) // 98.78 // q11.23
11730804_s_at	0.125235	-0.125235	-1.18959	-0.250469	1.18959	down	PRPF38B	55119	0006397 // mRNA processing // inferred from electronic annotation /// 0008380 // RNA splicing // inferred from electronic annotation	0005634 // nucleus // inferred from electronic annotation /// 0005681 // spliceosomal complex // inferred from electronic annotation		chr1:109234913-109244745 (+) // 90.54 // p13.3
11736428_at	-0.145954	0.145954	1.22426	0.291908	1.22426	up	STYX	6815	0006470 // protein dephosphorylation // not recorded /// 0007283 // spermatogenesis // not recorded /// 0016311 // dephosphorylation // inferred from electronic annotation	0005737 // cytoplasm // not recorded	0004721 // phosphoprotein phosphatase activity // inferred from electronic annotation /// 0008138 // protein tyrosine/serine/threonine phosphatase activity // not recorded /// 0016787 // hydrolase activity // inferred from electronic annotation /// 0016791 // phosphatase activity // inferred from electronic annotation	chr14:53196877-53241703 (+) // 92.63 // q22.1
11734349_a_at	0.0322733	-0.0322733	-1.04576	-0.0645466	1.04576	down	TRIM11	81559	0009615 // response to virus // inferred from electronic annotation /// 0016567 // protein ubiquitination // inferred from electronic annotation /// 0045892 // negative regulation of transcription, DNA-dependent // inferred from electronic annotation /// 0050768 // negative regulation of neurogenesis // inferred from electronic annotation	0005622 // intracellular // inferred from electronic annotation /// 0005634 // nucleus // inferred from electronic annotation /// 0005737 // cytoplasm // inferred from direct assay /// 0005737 // cytoplasm // inferred from electronic annotation	0004842 // ubiquitin-protein ligase activity // inferred from electronic annotation /// 0008134 // transcription factor binding // inferred from electronic annotation /// 0008270 // zinc ion binding // inferred from electronic annotation /// 0016874 // ligase activity // inferred from electronic annotation /// 0046872 // metal ion binding // inferred from electronic annotation	chr1:228581378-228594541 (-) // 97.53 // q42.13
11744180_a_at	0.0597682	-0.0597682	-1.08639	-0.119536	1.08639	down	TCIRG1	10312	0006810 // transport // inferred from electronic annotation /// 0006811 // ion transport // inferred from electronic annotation /// 0006879 // cellular iron ion homeostasis // traceable author statement /// 0006968 // cellular defense response // traceable author statement /// 0008284 // positive regulation of cell proliferation // traceable author statement /// 0008286 // insulin receptor signal…	0000220 // vacuolar proton-transporting V-type ATPase, V0 domain // inferred from electronic annotation /// 0005739 // mitochondrion // inferred from electronic annotation /// 0005886 // plasma membrane // traceable author statement /// 0005886 // plasma membrane // inferred from electronic annotation /// 0005887 // integral to plasma membrane // traceable author statement /// 0010008 // endosome…	0005215 // transporter activity // traceable author statement /// 0015078 // hydrogen ion transmembrane transporter activity // inferred from electronic annotation	chr11:67806461-67818366 (+) // 95.4 // q13.2
11753358_a_at	-0.141217	0.141217	1.21625	0.282434	1.21625	up	ACVR1	90	0000082 // G1/S transition of mitotic cell cycle // inferred from mutant phenotype /// 0001569 // patterning of blood vessels // inferred from electronic annotation /// 0001655 // urogenital system development // inferred from electronic annotation /// 0001701 // in utero embryonic development // inferred from electronic annotation /// 0001702 // gastrulation with mouth forming second // inferred…	0005887 // integral to plasma membrane // inferred from direct assay /// 0005887 // integral to plasma membrane // inferred from electronic annotation /// 0016020 // membrane // inferred from electronic annotation /// 0016021 // integral to membrane // inferred from electronic annotation /// 0045177 // apical part of cell // inferred from electronic annotation /// 0048179 // activin receptor comp…	0000166 // nucleotide binding // inferred from electronic annotation /// 0004672 // protein kinase activity // inferred from direct assay /// 0004672 // protein kinase activity // inferred from electronic annotation /// 0004674 // protein serine/threonine kinase activity // inferred from direct assay /// 0004674 // protein serine/threonine kinase activity // inferred from electronic annotation //…	chr2:158622578-158732342 (-) // 99.9 // q24.1
11754542_x_at	-0.0263047	0.0263047	1.03714	0.0526094	1.03714	up	ZNF594	84622	0006351 // transcription, DNA-dependent // inferred from electronic annotation /// 0006355 // regulation of transcription, DNA-dependent // inferred from electronic annotation	0005622 // intracellular // inferred from electronic annotation /// 0005634 // nucleus // inferred from electronic annotation	0003676 // nucleic acid binding // inferred from electronic annotation /// 0003677 // DNA binding // inferred from electronic annotation /// 0008270 // zinc ion binding // inferred from electronic annotation /// 0046872 // metal ion binding // inferred from electronic annotation	chr17:5082830-5095157 (-) // 81.09 // p13.2
11736640_a_at	0.0208254	-0.0208254	-1.02929	-0.0416508	1.02929	down	ESRP2	80004	0006397 // mRNA processing // inferred from electronic annotation /// 0008380 // RNA splicing // inferred from electronic annotation /// 0043484 // regulation of RNA splicing // inferred from direct assay	0005634 // nucleus // inferred from direct assay /// 0005634 // nucleus // inferred from electronic annotation	0000166 // nucleotide binding // inferred from electronic annotation /// 0003676 // nucleic acid binding // inferred from electronic annotation /// 0003723 // RNA binding // inferred from electronic annotation /// 0003729 // mRNA binding // inferred from direct assay	chr16:68262449-68270487 (-) // 95.98 // q22.1
11763281_s_at	-0.0871072	0.0871072	1.12835	0.174214	1.12835	up	RPL23AP7 /// RPL23AP82	118433 /// 284942	0006412 // translation // inferred from electronic annotation	0005622 // intracellular // inferred from electronic annotation /// 0005840 // ribosome // inferred from electronic annotation	0000166 // nucleotide binding // inferred from electronic annotation /// 0003735 // structural constituent of ribosome // inferred from electronic annotation	chr2:114367303-114384617 (-) // 33.97 // q13
11737624_a_at	0.0814905	-0.0814905	-1.1196	-0.162981	1.1196	down	GAB2	9846	0007169 // transmembrane receptor protein tyrosine kinase signaling pathway // inferred from direct assay /// 0007229 // integrin-mediated signaling pathway // inferred from electronic annotation /// 0008284 // positive regulation of cell proliferation // inferred from direct assay /// 0016477 // cell migration // inferred from electronic annotation /// 0030316 // osteoclast differentiation // in…	0005622 // intracellular // inferred from electronic annotation /// 0005737 // cytoplasm // inferred from direct assay /// 0005737 // cytoplasm // inferred from electronic annotation /// 0005829 // cytosol // traceable author statement /// 0005886 // plasma membrane // inferred from direct assay /// 0005886 // plasma membrane // inferred from electronic annotation /// 0016020 // membrane // infer…	0005068 // transmembrane receptor protein tyrosine kinase adaptor activity // inferred from direct assay /// 0005070 // SH3/SH2 adaptor activity // inferred from reviewed computational analysis /// 0005515 // protein binding // inferred from physical interaction /// 0005543 // phospholipid binding // inferred from electronic annotation /// 0005547 // phosphatidylinositol-3,4,5-trisphosphate bindi…	chr11:77926341-78128862 (-) // 93.28 // q14.1
11719362_at	-0.124762	0.124763	1.18882	0.249525	1.18882	up	FAM178A	55719				chr10:102672325-102724889 (+) // 98.28 // q24.31
11730351_at	-0.00837517	0.00837469	1.01168	0.0167499	1.01168	up	ANKRD52	283373				chr12:56631590-56652175 (-) // 98.74 // q13.3
11718611_at	-0.154481	0.15448	1.23882	0.308961	1.23882	up	TP53INP1	94241	0006351 // transcription, DNA-dependent // inferred from electronic annotation /// 0006355 // regulation of transcription, DNA-dependent // inferred from electronic annotation /// 0006914 // autophagy // inferred from electronic annotation /// 0006915 // apoptotic process // inferred from electronic annotation /// 0006917 // induction of apoptosis // inferred from electronic annotation /// 000695…	0005634 // nucleus // inferred from direct assay /// 0005634 // nucleus // inferred from electronic annotation /// 0005737 // cytoplasm // inferred from electronic annotation /// 0005776 // autophagic vacuole // inferred from direct assay /// 0005776 // autophagic vacuole // inferred from electronic annotation /// 0005829 // cytosol // inferred from direct assay /// 0005829 // cytosol // inferred…	0005515 // protein binding // inferred from physical interaction /// 0016209 // antioxidant activity // inferred from sequence or structural similarity /// 0016209 // antioxidant activity // inferred from electronic annotation	chr8:95938199-95961726 (-) // 92.51 // q22.1
11739232_x_at	-0.115348	0.115348	1.1734	0.230696	1.1734	up	RASSF2	9770	0007049 // cell cycle // inferred from electronic annotation /// 0007165 // signal transduction // inferred from electronic annotation	0005634 // nucleus // inferred from electronic annotation /// 0005737 // cytoplasm // inferred from electronic annotation	0005515 // protein binding // inferred from physical interaction	chr20:4760668-4803050 (-) // 90.41 // p13
AFFX-HSAC07/X00351_3_at	-0.0683022	0.0683022	1.09931	0.136604	1.09931	up	ACTB /// ACTB /// LOC100505829	100505829 /// 60	0006457 // protein folding // traceable author statement /// 0006928 // cellular component movement // traceable author statement /// 0007409 // axonogenesis // inferred from electronic annotation /// 0007411 // axon guidance // traceable author statement /// 0007596 // blood coagulation // traceable author statement /// 0034329 // cell junction assembly // traceable author statement /// 0034332 …	0005625 // soluble fraction // inferred from electronic annotation /// 0005737 // cytoplasm // traceable author statement /// 0005737 // cytoplasm // inferred from electronic annotation /// 0005829 // cytosol // traceable author statement /// 0005829 // cytosol // inferred from electronic annotation /// 0005856 // cytoskeleton // traceable author statement /// 0005856 // cytoskeleton // inferred …	0000166 // nucleotide binding // inferred from electronic annotation /// 0005200 // structural constituent of cytoskeleton // traceable author statement /// 0005200 // structural constituent of cytoskeleton // inferred from electronic annotation /// 0005515 // protein binding // inferred from physical interaction /// 0005524 // ATP binding // inferred from electronic annotation /// 0019894 // kin…
11728692_a_at	-0.0817256	0.0817261	1.11996	0.163452	1.11996	up	LOC728802 /// PDE4DIP	728802 /// 9659	0043623 // cellular protein complex assembly // inferred from sequence or structural similarity	0005634 // nucleus // inferred from direct assay /// 0005634 // nucleus // inferred from electronic annotation /// 0005737 // cytoplasm // inferred from direct assay /// 0005737 // cytoplasm // inferred from electronic annotation /// 0005794 // Golgi apparatus // inferred from sequence or structural similarity /// 0005794 // Golgi apparatus // inferred from electronic annotation /// 0005813 // ce…	0005515 // protein binding // inferred from physical interaction /// 0019899 // enzyme binding // inferred from sequence or structural similarity	chr1:144890591-144932455 (-) // 99.45 // q21.1
11742877_x_at	0.118665	-0.118665	-1.17881	-0.23733	1.17881	down	SGSM3	27352	0007049 // cell cycle // inferred from electronic annotation /// 0007050 // cell cycle arrest // inferred from electronic annotation /// 0032313 // regulation of Rab GTPase activity // inferred from electronic annotation /// 0032483 // regulation of Rab protein signal transduction // inferred from expression pattern /// 0032486 // Rap protein signal transduction // inferred from expression patter…	0005622 // intracellular // inferred from electronic annotation /// 0005737 // cytoplasm // inferred from electronic annotation /// 0005921 // gap junction // inferred from electronic annotation	0005097 // Rab GTPase activator activity // inferred from electronic annotation /// 0005515 // protein binding // inferred from physical interaction /// 0017137 // Rab GTPase binding // inferred from direct assay	chr22:40766588-40806289 (+) // 95.74 // q13.1
11747293_a_at	-0.0187855	0.0187855	1.02638	0.037571	1.02638	up	CD1B	910	0006955 // immune response // inferred from electronic annotation /// 0019882 // antigen processing and presentation // inferred from electronic annotation	0005764 // lysosome // inferred from electronic annotation /// 0005765 // lysosomal membrane // inferred from electronic annotation /// 0005768 // endosome // inferred from electronic annotation /// 0005886 // plasma membrane // inferred from electronic annotation /// 0005886 // plasma membrane // traceable author statement /// 0010008 // endosome membrane // inferred from electronic annotation /…	0005515 // protein binding // inferred from physical interaction	chr1:158300085-158301828 (-) // 95.85 // q23.1
11742860_a_at	-0.0342486	0.0342486	1.04862	0.0684972	1.04862	up	GPR116	221395	0007165 // signal transduction // inferred from electronic annotation /// 0007166 // cell surface receptor signaling pathway // inferred from electronic annotation /// 0007186 // G-protein coupled receptor signaling pathway // traceable author statement /// 0007186 // G-protein coupled receptor signaling pathway // inferred from electronic annotation /// 0007218 // neuropeptide signaling pathway …	0005886 // plasma membrane // inferred from electronic annotation /// 0016020 // membrane // inferred from electronic annotation /// 0016021 // integral to membrane // inferred from electronic annotation /// 0016021 // integral to membrane // traceable author statement	0004871 // signal transducer activity // inferred from electronic annotation /// 0004872 // receptor activity // inferred from electronic annotation /// 0004888 // transmembrane signaling receptor activity // inferred from electronic annotation /// 0004930 // G-protein coupled receptor activity // inferred from electronic annotation /// 0004930 // G-protein coupled receptor activity // traceable …	chr6:46820246-46889742 (-) // 98.41 // p12.3
11745498_a_at	-0.0466814	0.0466814	1.06685	0.0933628	1.06685	up	IRF3	3661	0000122 // negative regulation of transcription from RNA polymerase II promoter // inferred from electronic annotation /// 0002756 // MyD88-independent toll-like receptor signaling pathway // traceable author statement /// 0006351 // transcription, DNA-dependent // inferred from electronic annotation /// 0006355 // regulation of transcription, DNA-dependent // inferred from electronic annotation …	0005634 // nucleus // inferred from direct assay /// 0005634 // nucleus // inferred from electronic annotation /// 0005654 // nucleoplasm // traceable author statement /// 0005737 // cytoplasm // inferred from direct assay /// 0005737 // cytoplasm // inferred from electronic annotation /// 0005829 // cytosol // traceable author statement /// 0005886 // plasma membrane // traceable author statemen…	0000975 // regulatory region DNA binding // inferred from electronic annotation /// 0003677 // DNA binding // non-traceable author statement /// 0003677 // DNA binding // inferred from electronic annotation /// 0003700 // sequence-specific DNA binding transcription factor activity // inferred from electronic annotation /// 0003712 // transcription cofactor activity // traceable author statement /…	chr19:50162904-50169116 (-) // 94.82 // q13.33
11726129_at	-0.0302138	0.0302138	1.04277	0.0604277	1.04277	up	HBZ	3050	0000122 // negative regulation of transcription from RNA polymerase II promoter // inferred from electronic annotation /// 0006810 // transport // inferred from electronic annotation /// 0015671 // oxygen transport // traceable author statement /// 0015671 // oxygen transport // inferred from electronic annotation /// 0043249 // erythrocyte maturation // inferred from electronic annotation	0005833 // hemoglobin complex // inferred from electronic annotation /// 0005833 // hemoglobin complex // traceable author statement	0005344 // oxygen transporter activity // inferred from electronic annotation /// 0005344 // oxygen transporter activity // traceable author statement /// 0005506 // iron ion binding // inferred from electronic annotation /// 0019825 // oxygen binding // inferred from electronic annotation /// 0020037 // heme binding // inferred from electronic annotation /// 0046872 // metal ion binding // infer…	chr16:202683-204505 (+) // 92.67 // p13.3
11730174_at	0.0384636	-0.0384636	-1.05477	-0.0769272	1.05477	down	C4orf3	401152		0016020 // membrane // inferred from electronic annotation /// 0016021 // integral to membrane // inferred from electronic annotation		chr4:120217574-120222256 (-) // 56.88 // q26
11715132_x_at	0.102479	-0.102479	-1.15265	-0.204958	1.15265	down	HIST1H2BH	8345	0006334 // nucleosome assembly // non-traceable author statement /// 0006334 // nucleosome assembly // inferred from electronic annotation	0000786 // nucleosome // non-traceable author statement /// 0000786 // nucleosome // inferred from electronic annotation /// 0005634 // nucleus // inferred from electronic annotation /// 0005694 // chromosome // inferred from electronic annotation	0003677 // DNA binding // non-traceable author statement /// 0003677 // DNA binding // inferred from electronic annotation	chr6:26251878-26252303 (+) // 100.0 // p22.2
11736997_a_at	0.16644	-0.16644	-1.25952	-0.332879	1.25952	down	MOSPD3	64598	0007507 // heart development // inferred from electronic annotation	0016020 // membrane // inferred from electronic annotation /// 0016021 // integral to membrane // inferred from electronic annotation	0005198 // structural molecule activity // inferred from electronic annotation	chr7:100209724-100212998 (+) // 95.52 // q22.1
11721214_a_at	0.135152	-0.135152	-1.20606	-0.270304	1.20606	down	TMEM106B	54664		0005764 // lysosome // inferred from electronic annotation /// 0005765 // lysosomal membrane // inferred from electronic annotation /// 0005768 // endosome // inferred from electronic annotation /// 0016020 // membrane // inferred from electronic annotation /// 0016021 // integral to membrane // inferred from electronic annotation /// 0031902 // late endosome membrane // inferred from electronic …		chr7:12250847-12276890 (+) // 91.68 // p21.3
11739333_at	0.0132678	-0.0132678	-1.01856	-0.0265355	1.01856	down	SSTR2	6752	0006937 // regulation of muscle contraction // inferred from electronic annotation /// 0007165 // signal transduction // inferred from electronic annotation /// 0007186 // G-protein coupled receptor signaling pathway // inferred from electronic annotation /// 0007187 // G-protein coupled receptor signaling pathway, coupled to cyclic nucleotide second messenger // traceable author statement /// 00…	0005624 // membrane fraction // inferred from electronic annotation /// 0005737 // cytoplasm // inferred from electronic annotation /// 0005886 // plasma membrane // traceable author statement /// 0005886 // plasma membrane // inferred from electronic annotation /// 0005887 // integral to plasma membrane // traceable author statement /// 0016020 // membrane // inferred from electronic annotation …	0004871 // signal transducer activity // inferred from electronic annotation /// 0004872 // receptor activity // inferred from electronic annotation /// 0004930 // G-protein coupled receptor activity // inferred from electronic annotation /// 0004994 // somatostatin receptor activity // inferred from electronic annotation /// 0004994 // somatostatin receptor activity // traceable author statement…	chr17:71161115-71168060 (+) // 82.39 // q25.1
11741018_a_at	0.00192451	-0.00192451	-1.00267	-0.00384903	1.00267	down	FAM65A	79567		0005737 // cytoplasm // inferred from sequence or structural similarity /// 0005737 // cytoplasm // inferred from electronic annotation		chr16:67562716-67580688 (+) // 98.59 // q22.1
11743968_a_at	-0.0243444	0.0243444	1.03432	0.0486889	1.03432	up	CYBA	1535	0001938 // positive regulation of endothelial cell proliferation // inferred from electronic annotation /// 0002474 // antigen processing and presentation of peptide antigen via MHC class I // traceable author statement /// 0002479 // antigen processing and presentation of exogenous peptide antigen via MHC class I, TAP-dependent // traceable author statement /// 0003106 // negative regulation of …	0005737 // cytoplasm // inferred from electronic annotation /// 0005739 // mitochondrion // inferred from electronic annotation /// 0005794 // Golgi apparatus // inferred from electronic annotation /// 0016020 // membrane // inferred from electronic annotation /// 0016324 // apical plasma membrane // inferred from electronic annotation /// 0030141 // secretory granule // traceable author statemen…	0005515 // protein binding // inferred from physical interaction /// 0009055 // electron carrier activity // inferred from direct assay /// 0009055 // electron carrier activity // traceable author statement /// 0016175 // superoxide-generating NADPH oxidase activity // inferred from mutant phenotype /// 0016175 // superoxide-generating NADPH oxidase activity // inferred from electronic annotation…	chr16:88709696-88717560 (-) // 63.95 // q24.3
11736749_a_at	-0.0277925	0.0277925	1.03928	0.0555849	1.03928	up	SLC22A9	114571	0006810 // transport // inferred from electronic annotation /// 0055085 // transmembrane transport // inferred from electronic annotation	0016020 // membrane // inferred from electronic annotation /// 0016021 // integral to membrane // inferred from electronic annotation		chr11:63137154-63177710 (+) // 86.42 // q12.3
11746592_s_at	-0.187503	0.187503	1.29684	0.375005	1.29684	up	LOC100288332 /// LOC100506193 /// LOC642778 /// LOC642799 /// NPIP /// NPIPL3 /// PKD1P1	100288332 /// 100506193 /// 23117 /// 339044 /// 642778 /// 642799 /// 9284	0001502 // cartilage condensation // inferred from electronic annotation /// 0001568 // blood vessel development // inferred from electronic annotation /// 0001701 // in utero embryonic development // inferred from electronic annotation /// 0001701 // in utero embryonic development // inferred from sequence or structural similarity /// 0001822 // kidney development // inferred from electronic ann…	0002133 // polycystin complex // inferred from electronic annotation /// 0002133 // polycystin complex // inferred from sequence or structural similarity /// 0005634 // nucleus // inferred from electronic annotation /// 0005634 // nucleus // inferred from sequence or structural similarity /// 0005643 // nuclear pore // inferred from electronic annotation /// 0005737 // cytoplasm // inferred from …	0005261 // cation channel activity // inferred from electronic annotation /// 0005261 // cation channel activity // inferred from sequence or structural similarity /// 0005515 // protein binding // inferred from physical interaction /// 0019901 // protein kinase binding // inferred from physical interaction /// 0019904 // protein domain specific binding // inferred from physical interaction /// 0…	chr16:70011367-70023987 (-) // 99.26 // q22.1
11729410_a_at	0.0596602	-0.0596602	-1.08622	-0.11932	1.08622	down	ZNF415	55786	0006351 // transcription, DNA-dependent // inferred from electronic annotation /// 0006355 // regulation of transcription, DNA-dependent // inferred from electronic annotation	0005622 // intracellular // inferred from electronic annotation /// 0005634 // nucleus // inferred from electronic annotation /// 0005730 // nucleolus // inferred from direct assay /// 0005737 // cytoplasm // inferred from direct assay /// 0005737 // cytoplasm // inferred from electronic annotation /// 0015630 // microtubule cytoskeleton // inferred from direct assay	0003676 // nucleic acid binding // inferred from electronic annotation /// 0003677 // DNA binding // inferred from electronic annotation /// 0008270 // zinc ion binding // inferred from electronic annotation /// 0046872 // metal ion binding // inferred from electronic annotation	chr19:53611132-53636145 (-) // 91.41 // q13.42
11721848_at	-0.0806189	0.0806179	1.11825	0.161237	1.11825	up	REEP2	51308		0016020 // membrane // inferred from electronic annotation /// 0016021 // integral to membrane // inferred from electronic annotation	0004872 // receptor activity // inferred from electronic annotation	chr5:137774732-137782658 (+) // 92.04 // q31.2
11761778_a_at	0.0952916	-0.0952916	-1.14122	-0.190583	1.14122	down	WDR45	11152	0000045 // autophagic vacuole assembly // not recorded	0005737 // cytoplasm // not recorded	0005083 // small GTPase regulator activity // inferred from electronic annotation /// 0032266 // phosphatidylinositol-3-phosphate binding // not recorded /// 0080025 // phosphatidylinositol-3,5-bisphosphate binding // not recorded	chrX:48934732-48937553 (-) // 74.25 // p11.23
11731939_a_at	-0.0934439	0.0934439	1.13831	0.186888	1.13831	up	UCP3	7352	0000303 // response to superoxide // inferred from electronic annotation /// 0001666 // response to hypoxia // inferred from electronic annotation /// 0006629 // lipid metabolic process // traceable author statement /// 0006631 // fatty acid metabolic process // inferred from electronic annotation /// 0006810 // transport // inferred from electronic annotation /// 0006839 // mitochondrial transpo…	0005739 // mitochondrion // traceable author statement /// 0005739 // mitochondrion // inferred from electronic annotation /// 0005743 // mitochondrial inner membrane // traceable author statement /// 0005743 // mitochondrial inner membrane // inferred from electronic annotation /// 0016020 // membrane // inferred from electronic annotation /// 0016021 // integral to membrane // inferred from ele…	0005215 // transporter activity // traceable author statement /// 0017077 // oxidative phosphorylation uncoupler activity // inferred from electronic annotation	chr11:73711326-73720563 (-) // 92.25 // q13.4
11743553_a_at	-0.0263891	0.0263896	1.03726	0.0527787	1.03726	up	KIN	22944	0006260 // DNA replication // inferred from direct assay /// 0006260 // DNA replication // inferred from electronic annotation /// 0006281 // DNA repair // inferred from electronic annotation /// 0006310 // DNA recombination // inferred from electronic annotation /// 0006397 // mRNA processing // traceable author statement /// 0006397 // mRNA processing // inferred from electronic annotation /// …	0005622 // intracellular // inferred from electronic annotation /// 0005634 // nucleus // traceable author statement /// 0005634 // nucleus // inferred from electronic annotation /// 0005737 // cytoplasm // inferred from electronic annotation /// 0016363 // nuclear matrix // inferred from direct assay	0003677 // DNA binding // traceable author statement /// 0003677 // DNA binding // inferred from electronic annotation /// 0003690 // double-stranded DNA binding // inferred from sequence or structural similarity /// 0003690 // double-stranded DNA binding // inferred from electronic annotation /// 0003723 // RNA binding // inferred from direct assay /// 0003723 // RNA binding // inferred from ele…	chr10:7797191-7829935 (-) // 76.66 // p14
11758285_s_at	-0.0245752	0.0245752	1.03466	0.0491505	1.03466	up	GTF3C1	2975	0006351 // transcription, DNA-dependent // inferred by curator /// 0006351 // transcription, DNA-dependent // inferred from electronic annotation /// 0006383 // transcription from RNA polymerase III promoter // inferred by curator /// 0006383 // transcription from RNA polymerase III promoter // traceable author statement /// 0009303 // rRNA transcription // traceable author statement /// 0009304 …	0000127 // transcription factor TFIIIC complex // inferred from direct assay /// 0000127 // transcription factor TFIIIC complex // inferred from electronic annotation /// 0005634 // nucleus // inferred from electronic annotation /// 0005654 // nucleoplasm // traceable author statement /// 0030529 // ribonucleoprotein complex // inferred from electronic annotation	0003677 // DNA binding // inferred by curator /// 0003677 // DNA binding // inferred from electronic annotation /// 0005515 // protein binding // inferred from physical interaction	chr16:27471776-27472301 (-) // 89.74 // p12.1
11757037_s_at	-0.0476246	0.0476246	1.06825	0.0952492	1.06825	up	H3F3A /// H3F3B	3020 /// 3021	0006334 // nucleosome assembly // inferred from electronic annotation /// 0007596 // blood coagulation // traceable author statement	0000786 // nucleosome // inferred from electronic annotation /// 0005576 // extracellular region // traceable author statement /// 0005634 // nucleus // inferred from direct assay /// 0005634 // nucleus // inferred from electronic annotation /// 0005654 // nucleoplasm // traceable author statement /// 0005694 // chromosome // inferred from electronic annotation	0003677 // DNA binding // inferred from electronic annotation	chr17:73774152-73775853 (-) // 99.82 // q25.1
11724973_a_at	-0.0712252	0.0712252	1.10378	0.14245	1.10378	up	MYRIP	25924	0006886 // intracellular protein transport // inferred from electronic annotation /// 0032024 // positive regulation of insulin secretion // inferred from sequence or structural similarity	0001750 // photoreceptor outer segment // inferred from electronic annotation /// 0005622 // intracellular // inferred from electronic annotation /// 0005737 // cytoplasm // inferred from electronic annotation /// 0015629 // actin cytoskeleton // inferred from electronic annotation /// 0030133 // transport vesicle // inferred from electronic annotation /// 0031045 // dense core granule // inferre…	0003779 // actin binding // inferred from electronic annotation /// 0005515 // protein binding // inferred from physical interaction /// 0008270 // zinc ion binding // non-traceable author statement /// 0017022 // myosin binding // inferred from electronic annotation /// 0017137 // Rab GTPase binding // inferred from electronic annotation /// 0046872 // metal ion binding // inferred from electron…	chr3:39850913-40301812 (+) // 93.45 // p22.1
11730180_s_at	0.136055	-0.136055	-1.20757	-0.272111	1.20757	down	KDSR	2531	0006665 // sphingolipid metabolic process // traceable author statement /// 0006665 // sphingolipid metabolic process // inferred from electronic annotation /// 0006666 // 3-keto-sphinganine metabolic process // inferred from direct assay /// 0008152 // metabolic process // inferred from electronic annotation /// 0030148 // sphingolipid biosynthetic process // traceable author statement /// 00301…	0005615 // extracellular space // traceable author statement /// 0005783 // endoplasmic reticulum // inferred from direct assay /// 0005783 // endoplasmic reticulum // inferred from electronic annotation /// 0005789 // endoplasmic reticulum membrane // traceable author statement /// 0005789 // endoplasmic reticulum membrane // inferred from electronic annotation /// 0016020 // membrane // inferre…	0000166 // nucleotide binding // inferred from electronic annotation /// 0016491 // oxidoreductase activity // inferred from electronic annotation /// 0047560 // 3-dehydrosphinganine reductase activity // inferred from direct assay /// 0047560 // 3-dehydrosphinganine reductase activity // inferred from electronic annotation	chr18:60994807-61034516 (-) // 81.73 // q21.33
11724053_a_at	-0.231728	0.231728	1.37884	0.463455	1.37884	up	FGFRL1	53834	0001501 // skeletal system development // inferred from electronic annotation /// 0001558 // regulation of cell growth // non-traceable author statement /// 0003179 // heart valve morphogenesis // inferred from electronic annotation /// 0008285 // negative regulation of cell proliferation // inferred from electronic annotation /// 0008543 // fibroblast growth factor receptor signaling pathway // …	0005886 // plasma membrane // inferred from direct assay /// 0005886 // plasma membrane // inferred from electronic annotation /// 0016020 // membrane // inferred from electronic annotation /// 0016021 // integral to membrane // inferred from electronic annotation	0004872 // receptor activity // inferred from electronic annotation /// 0005007 // fibroblast growth factor-activated receptor activity // inferred from direct assay /// 0005007 // fibroblast growth factor-activated receptor activity // inferred from electronic annotation /// 0008201 // heparin binding // inferred from direct assay /// 0017134 // fibroblast growth factor binding // inferred from …	chr4:1006240-1020686 (+) // 75.49 // p16.3
11741696_x_at	0.0462446	-0.0462451	-1.06621	-0.0924897	1.06621	down	NSUN5P1	155400				chr7:75039645-75046065 (+) // 100.0 // q11.23 /// chr7:72418837-72425261 (-) // 98.71 // q11.23 /// chr7:72717226-72722792 (-) // 96.34 // q11.23
11751535_s_at	0.0562263	-0.0562263	-1.08106	-0.112453	1.08106	down	CA3	761	0006730 // one-carbon metabolic process // inferred from electronic annotation /// 0006979 // response to oxidative stress // inferred from electronic annotation	0005737 // cytoplasm // inferred from electronic annotation	0004089 // carbonate dehydratase activity // inferred from electronic annotation /// 0004089 // carbonate dehydratase activity // traceable author statement /// 0008270 // zinc ion binding // inferred from electronic annotation /// 0016151 // nickel cation binding // inferred from electronic annotation /// 0016829 // lyase activity // inferred from electronic annotation /// 0046872 // metal ion b…	chr8:86351086-86360746 (+) // 99.91 // q21.2
11716209_a_at	0.0887561	-0.0887566	-1.13093	-0.177513	1.13093	down	VPS28	51160	0006810 // transport // inferred from electronic annotation /// 0015031 // protein transport // inferred from electronic annotation /// 0016032 // viral reproduction // traceable author statement /// 0016044 // cellular membrane organization // traceable author statement /// 0016197 // endosomal transport // traceable author statement /// 0031397 // negative regulation of protein ubiquitination /…	0005737 // cytoplasm // inferred from direct assay /// 0005768 // endosome // inferred from direct assay /// 0005768 // endosome // inferred from electronic annotation /// 0005829 // cytosol // inferred from direct assay /// 0005886 // plasma membrane // inferred from electronic annotation /// 0010008 // endosome membrane // traceable author statement /// 0016020 // membrane // inferred from elec…	0005515 // protein binding // inferred from physical interaction	chr8:145649000-145653895 (-) // 69.48 // q24.3
11734043_at	-0.112013	0.112013	1.16799	0.224027	1.16799	up	KIAA0408 /// SOGA3	387104 /// 9729		0016020 // membrane // inferred from electronic annotation /// 0016021 // integral to membrane // inferred from electronic annotation	0005515 // protein binding // inferred from physical interaction	chr6:127761734-127840792 (-) // 96.66 // q22.33
11762934_at	0.0527909	-0.0527909	-1.07593	-0.105582	1.07593	down	CD300LG	146894		0005768 // endosome // inferred from electronic annotation /// 0005886 // plasma membrane // inferred from electronic annotation /// 0016020 // membrane // inferred from electronic annotation /// 0016021 // integral to membrane // inferred from electronic annotation /// 0016323 // basolateral plasma membrane // inferred from electronic annotation /// 0016324 // apical plasma membrane // inferred …	0004872 // receptor activity // inferred from electronic annotation	chr17:41924523-41935518 (+) // 75.83 // q21.31
11737888_a_at	0.0771737	-0.0771737	-1.11292	-0.154347	1.11292	down	HRH4	59340	0006954 // inflammatory response // inferred from electronic annotation /// 0007165 // signal transduction // inferred from electronic annotation /// 0007186 // G-protein coupled receptor signaling pathway // inferred from electronic annotation	0005624 // membrane fraction // inferred from electronic annotation /// 0005886 // plasma membrane // traceable author statement /// 0005886 // plasma membrane // inferred from electronic annotation /// 0016020 // membrane // inferred from electronic annotation /// 0016021 // integral to membrane // non-traceable author statement /// 0016021 // integral to membrane // inferred from electronic ann…	0004871 // signal transducer activity // inferred from electronic annotation /// 0004872 // receptor activity // inferred from electronic annotation /// 0004930 // G-protein coupled receptor activity // inferred from electronic annotation /// 0004969 // histamine receptor activity // non-traceable author statement /// 0004969 // histamine receptor activity // inferred from electronic annotation	chr18:22040592-22059920 (+) // 59.72 // q11.2
11718294_s_at	-0.0551596	0.0551596	1.07947	0.110319	1.07947	up	NME1-NME2 /// NME2	4831 /// 654364	0002762 // negative regulation of myeloid leukocyte differentiation // inferred from electronic annotation /// 0006165 // nucleoside diphosphate phosphorylation // inferred from direct assay /// 0006165 // nucleoside diphosphate phosphorylation // inferred from electronic annotation /// 0006183 // GTP biosynthetic process // inferred from electronic annotation /// 0006228 // UTP biosynthetic proc…	0001726 // ruffle // inferred from direct assay /// 0005625 // soluble fraction // inferred from electronic annotation /// 0005634 // nucleus // non-traceable author statement /// 0005634 // nucleus // inferred from electronic annotation /// 0005634 // nucleus // traceable author statement /// 0005737 // cytoplasm // inferred from direct assay /// 0005737 // cytoplasm // inferred from electronic …	0000166 // nucleotide binding // inferred from electronic annotation /// 0000287 // magnesium ion binding // inferred from direct assay /// 0003677 // DNA binding // inferred from electronic annotation /// 0003700 // sequence-specific DNA binding transcription factor activity // traceable author statement /// 0004536 // deoxyribonuclease activity // inferred from direct assay /// 0004550 // nucle…	chr17:49230925-49249104 (+) // 72.48 // q21.33
11743861_a_at	0.0932922	-0.0932922	-1.13807	-0.186584	1.13807	down	NIPSNAP3A	25934		0005737 // cytoplasm // inferred from electronic annotation /// 0005829 // cytosol // inferred from electronic annotation	0005515 // protein binding // inferred from physical interaction	chr9:107509870-107522400 (+) // 96.54 // q31.1
11715832_s_at	0.100359	-0.100359	-1.14927	-0.200718	1.14927	down	SURF4	6836	0007030 // Golgi organization // inferred from mutant phenotype /// 0010638 // positive regulation of organelle organization // inferred from mutant phenotype /// 0032527 // protein exit from endoplasmic reticulum // inferred from mutant phenotype /// 0034498 // early endosome to Golgi transport // inferred from mutant phenotype	0000139 // Golgi membrane // inferred from electronic annotation /// 0005783 // endoplasmic reticulum // inferred from electronic annotation /// 0005789 // endoplasmic reticulum membrane // inferred from electronic annotation /// 0005793 // endoplasmic reticulum-Golgi intermediate compartment // inferred from direct assay /// 0005794 // Golgi apparatus // inferred from electronic annotation /// 0…	0005515 // protein binding // inferred from physical interaction	chr9:136228335-136243000 (-) // 95.94 // q34.2
11730835_a_at	-0.0510864	0.0510864	1.07339	0.102173	1.07339	up	MTX2	10651	0006626 // protein targeting to mitochondrion // inferred from electronic annotation /// 0006626 // protein targeting to mitochondrion // traceable author statement /// 0006810 // transport // inferred from electronic annotation /// 0006839 // mitochondrial transport // traceable author statement /// 0015031 // protein transport // inferred from electronic annotation /// 0044267 // cellular prote…	0005739 // mitochondrion // inferred from electronic annotation /// 0005741 // mitochondrial outer membrane // inferred from electronic annotation /// 0005741 // mitochondrial outer membrane // traceable author statement /// 0016020 // membrane // inferred from electronic annotation		chr2:177134143-177202751 (+) // 97.76 // q31.1
11723092_at	0.038187	-0.038187	-1.05436	-0.0763741	1.05436	down	FNIP2	57600	0001932 // regulation of protein phosphorylation // inferred from direct assay /// 0006468 // protein phosphorylation // inferred from direct assay /// 0006974 // response to DNA damage stimulus // inferred from electronic annotation /// 0008630 // DNA damage response, signal transduction resulting in induction of apoptosis // inferred from sequence or structural similarity	0005634 // nucleus // inferred from direct assay /// 0005730 // nucleolus // inferred from direct assay /// 0005737 // cytoplasm // inferred from direct assay /// 0005737 // cytoplasm // inferred from electronic annotation /// 0005886 // plasma membrane // inferred from direct assay	0005515 // protein binding // inferred from physical interaction	chr4:159690165-159828201 (+) // 97.59 // q32.1
11725177_at	-0.068882	0.068882	1.1002	0.137764	1.1002	up	KCTD11	147040	0007049 // cell cycle // inferred from electronic annotation /// 0007275 // multicellular organismal development // inferred from electronic annotation /// 0007399 // nervous system development // inferred from electronic annotation /// 0030154 // cell differentiation // inferred from electronic annotation /// 0040008 // regulation of growth // inferred from electronic annotation /// 0042127 // r…	0005737 // cytoplasm // inferred from electronic annotation		chr17:7255207-7258263 (+) // 94.51 // p13.1
11762768_at	-0.149338	0.149337	1.23001	0.298675	1.23001	up	ZNF215	7762	0006351 // transcription, DNA-dependent // inferred from electronic annotation /// 0006355 // regulation of transcription, DNA-dependent // non-traceable author statement /// 0006355 // regulation of transcription, DNA-dependent // inferred from electronic annotation /// 0016032 // viral reproduction // inferred from electronic annotation	0005622 // intracellular // inferred from electronic annotation /// 0005634 // nucleus // inferred from electronic annotation /// 0005634 // nucleus // non-traceable author statement	0003676 // nucleic acid binding // inferred from electronic annotation /// 0003677 // DNA binding // inferred from electronic annotation /// 0003700 // sequence-specific DNA binding transcription factor activity // inferred from electronic annotation /// 0003700 // sequence-specific DNA binding transcription factor activity // non-traceable author statement /// 0008270 // zinc ion binding // non-…	chr11:6953416-6977013 (+) // 62.35 // p15.4
11743965_s_at	-0.00562	0.00562	1.00782	0.01124	1.00782	up	CERCAM /// LOC100506065	100506065 /// 51148	0006928 // cellular component movement // traceable author statement /// 0007155 // cell adhesion // inferred from direct assay /// 0007155 // cell adhesion // inferred from electronic annotation /// 0007159 // leukocyte cell-cell adhesion // traceable author statement /// 0009103 // lipopolysaccharide biosynthetic process // inferred from electronic annotation	0005783 // endoplasmic reticulum // inferred from electronic annotation /// 0005788 // endoplasmic reticulum lumen // inferred from electronic annotation /// 0005886 // plasma membrane // non-traceable author statement		chr9:131182759-131199628 (+) // 92.03 // q34.11
11741324_s_at	0.227342	-0.227342	-1.37048	-0.454683	1.37048	down	TRIM51 /// TRIM51EP /// TRIM51GP /// TRIM51HP	120824 /// 399940 /// 440041 /// 84767		0005622 // intracellular // inferred from electronic annotation	0008270 // zinc ion binding // inferred from electronic annotation /// 0046872 // metal ion binding // inferred from electronic annotation	chr11:55650772-55659282 (+) // 98.6 // q11 /// chr11:89586007-89596233 (+) // 95.63 // q14.3 /// chr11:89714612-89724840 (-) // 95.51 // q14.3 /// chr11:55059364-55067885 (-) // 95.33 // q11
11735795_at	-0.0673528	0.0673533	1.09787	0.134706	1.09787	up	GPSM1	26086	0007165 // signal transduction // inferred from electronic annotation /// 0007275 // multicellular organismal development // inferred from electronic annotation /// 0007399 // nervous system development // inferred from electronic annotation /// 0008277 // regulation of G-protein coupled receptor protein signaling pathway // inferred from electronic annotation /// 0030154 // cell differentiation …	0000139 // Golgi membrane // inferred from electronic annotation /// 0005634 // nucleus // inferred from direct assay /// 0005730 // nucleolus // inferred from direct assay /// 0005737 // cytoplasm // inferred from electronic annotation /// 0005783 // endoplasmic reticulum // inferred from electronic annotation /// 0005789 // endoplasmic reticulum membrane // inferred from electronic annotation /…	0001965 // G-protein alpha-subunit binding // inferred from electronic annotation /// 0005092 // GDP-dissociation inhibitor activity // inferred from electronic annotation /// 0030695 // GTPase regulator activity // inferred from electronic annotation	chr9:139221931-139236801 (+) // 86.97 // q34.3
11741004_a_at	-0.0779829	0.0779829	1.11417	0.155966	1.11417	up	ALS2CR8	79800	0006355 // regulation of transcription, DNA-dependent // inferred from electronic annotation	0005634 // nucleus // inferred from electronic annotation /// 0005654 // nucleoplasm // inferred from electronic annotation /// 0005730 // nucleolus // inferred from electronic annotation	0003700 // sequence-specific DNA binding transcription factor activity // inferred from electronic annotation	chr2:203776940-203851060 (+) // 91.59 // q33.2
11763798_a_at	0.0588276	-0.0588276	-1.08497	-0.117655	1.08497	down	STMN4	81551	0035556 // intracellular signal transduction // inferred from electronic annotation	0005622 // intracellular // inferred from electronic annotation /// 0005794 // Golgi apparatus // inferred from electronic annotation /// 0030424 // axon // inferred from electronic annotation /// 0030426 // growth cone // inferred from electronic annotation /// 0042995 // cell projection // inferred from electronic annotation		chr8:27096856-27115921 (-) // 99.84 // p21.2
11731992_x_at	0.0786352	-0.0786352	-1.11518	-0.15727	1.11518	down	TROAP	10024	0007155 // cell adhesion // inferred from electronic annotation /// 0007155 // cell adhesion // traceable author statement	0005737 // cytoplasm // inferred from electronic annotation /// 0005737 // cytoplasm // traceable author statement	0005515 // protein binding // inferred from physical interaction	chr12:49716970-49718160 (+) // 76.39 // q13.12
11732719_at	0	0	-1	0	1	down	EREG	2069	0001525 // angiogenesis // inferred from electronic annotation /// 0001550 // ovarian cumulus expansion // inferred from sequence or structural similarity /// 0001550 // ovarian cumulus expansion // inferred from electronic annotation /// 0001556 // oocyte maturation // inferred from sequence or structural similarity /// 0001556 // oocyte maturation // inferred from electronic annotation /// 0001…	0005576 // extracellular region // traceable author statement /// 0005576 // extracellular region // inferred from electronic annotation /// 0005615 // extracellular space // inferred from direct assay /// 0005615 // extracellular space // inferred from electronic annotation /// 0005886 // plasma membrane // inferred from electronic annotation /// 0005887 // integral to plasma membrane // traceab…	0005154 // epidermal growth factor receptor binding // inferred from sequence or structural similarity /// 0005154 // epidermal growth factor receptor binding // traceable author statement /// 0005154 // epidermal growth factor receptor binding // inferred from electronic annotation /// 0005515 // protein binding // inferred from physical interaction /// 0008083 // growth factor activity // infer…	chr4:75230859-75254477 (+) // 83.41 // q13.3
11740723_x_at	-0.0130324	0.0130324	1.01823	0.0260649	1.01823	up	LGALS9B /// LGALS9C	284194 /// 654346			0030246 // carbohydrate binding // inferred from electronic annotation	chr17:18380101-18398173 (+) // 94.88 // p11.2 /// chr17:20352793-20370848 (-) // 95.06 // p11.2
11751552_at	0.0110521	-0.0110521	-1.01544	-0.0221043	1.01544	down	RNF223	401934		0016020 // membrane // inferred from electronic annotation /// 0016021 // integral to membrane // inferred from electronic annotation	0008270 // zinc ion binding // inferred from electronic annotation /// 0046872 // metal ion binding // inferred from electronic annotation	chr1:1007125-1009687 (-) // 95.1 // p36.33
11734940_a_at	0.0784161	-0.0784161	-1.11484	-0.156832	1.11484	down	SLC16A9	220963	0006810 // transport // inferred from electronic annotation /// 0046415 // urate metabolic process // inferred from mutant phenotype /// 0055085 // transmembrane transport // inferred from electronic annotation	0005886 // plasma membrane // inferred from electronic annotation /// 0016020 // membrane // inferred from electronic annotation /// 0016021 // integral to membrane // inferred from electronic annotation	0015293 // symporter activity // inferred from electronic annotation	chr10:61410522-61469837 (-) // 91.24 // q21.2
11755071_a_at	-0.215589	0.215589	1.34833	0.431178	1.34833	up	HMCN1	83872	0007596 // blood coagulation // inferred from electronic annotation /// 0007601 // visual perception // inferred from electronic annotation /// 0050896 // response to stimulus // inferred from electronic annotation	0005576 // extracellular region // inferred from electronic annotation /// 0005578 // proteinaceous extracellular matrix // inferred from electronic annotation /// 0005604 // basement membrane // inferred from electronic annotation /// 0005938 // cell cortex // inferred from electronic annotation /// 0016020 // membrane // inferred from electronic annotation /// 0030054 // cell junction // inferr…	0004888 // transmembrane signaling receptor activity // inferred from electronic annotation /// 0005509 // calcium ion binding // inferred from electronic annotation	chr1:186097341-186160079 (+) // 96.21 // q31.1
11759789_x_at	0.198614	-0.198614	-1.31698	-0.397228	1.31698	down	NLGN4Y	22829	0007155 // cell adhesion // inferred from electronic annotation /// 0007416 // synapse assembly // not recorded	0005886 // plasma membrane // inferred from electronic annotation /// 0005887 // integral to plasma membrane // not recorded /// 0009986 // cell surface // not recorded /// 0014069 // postsynaptic density // inferred from electronic annotation /// 0016020 // membrane // inferred from electronic annotation /// 0016021 // integral to membrane // inferred from electronic annotation /// 0030054 // ce…	0004091 // carboxylesterase activity // not recorded /// 0004872 // receptor activity // not recorded /// 0005515 // protein binding // inferred from physical interaction /// 0042043 // neurexin family protein binding // not recorded	chrY:16734097-16845419 (+) // 80.05 // q11.221
11750395_a_at	0.0689888	-0.0689888	-1.10036	-0.137978	1.10036	down	GLI2	2736	0000122 // negative regulation of transcription from RNA polymerase II promoter // inferred from electronic annotation /// 0000122 // negative regulation of transcription from RNA polymerase II promoter // inferred from mutant phenotype /// 0001501 // skeletal system development // inferred from electronic annotation /// 0001501 // skeletal system development // inferred from sequence or structur…	0005622 // intracellular // inferred from electronic annotation /// 0005624 // membrane fraction // inferred from electronic annotation /// 0005634 // nucleus // inferred from direct assay /// 0005634 // nucleus // inferred from electronic annotation /// 0005737 // cytoplasm // inferred from electronic annotation /// 0005929 // cilium // inferred from electronic annotation /// 0031512 // motile p…	0003676 // nucleic acid binding // inferred from electronic annotation /// 0003677 // DNA binding // inferred from electronic annotation /// 0003682 // chromatin binding // inferred from electronic annotation /// 0003700 // sequence-specific DNA binding transcription factor activity // inferred from direct assay /// 0003700 // sequence-specific DNA binding transcription factor activity // inferre…	chr2:121554871-121748562 (+) // 99.96 // q14.2
11738202_x_at	-0.0147705	0.0147705	1.02069	0.029541	1.02069	up	DAXX	1616	0000281 // cytokinesis after mitosis // inferred from electronic annotation /// 0006351 // transcription, DNA-dependent // inferred from electronic annotation /// 0006355 // regulation of transcription, DNA-dependent // inferred from direct assay /// 0006355 // regulation of transcription, DNA-dependent // inferred from electronic annotation /// 0006915 // apoptotic process // traceable author st…	0000775 // chromosome, centromeric region // inferred from electronic annotation /// 0000792 // heterochromatin // inferred from electronic annotation /// 0005634 // nucleus // inferred from direct assay /// 0005634 // nucleus // inferred from mutant phenotype /// 0005634 // nucleus // inferred from electronic annotation /// 0005654 // nucleoplasm // inferred from electronic annotation /// 000569…	0002039 // p53 binding // inferred from physical interaction /// 0005057 // receptor signaling protein activity // traceable author statement /// 0005515 // protein binding // inferred from physical interaction /// 0008134 // transcription factor binding // inferred from direct assay /// 0019899 // enzyme binding // inferred from physical interaction /// 0031072 // heat shock protein binding // t…	chr6:33286335-33290793 (-) // 94.47 // p21.32
11721048_s_at	0.0359693	-0.0359693	-1.05113	-0.0719385	1.05113	down	N6AMT2	221143	0032259 // methylation // inferred from electronic annotation		0003676 // nucleic acid binding // inferred from electronic annotation /// 0008168 // methyltransferase activity // inferred from electronic annotation /// 0016740 // transferase activity // inferred from electronic annotation	chr13:21302638-21348057 (-) // 88.65 // q12.11
11725050_a_at	0.0259562	-0.0259557	-1.03664	-0.0519118	1.03664	down	FAIM2	23017	0006915 // apoptotic process // inferred from electronic annotation /// 0006916 // anti-apoptosis // non-traceable author statement /// 0007417 // central nervous system development // inferred from electronic annotation /// 0021549 // cerebellum development // inferred from sequence or structural similarity /// 0021549 // cerebellum development // inferred from electronic annotation /// 0021680 …	0005886 // plasma membrane // inferred from electronic annotation /// 0016020 // membrane // inferred from electronic annotation /// 0016021 // integral to membrane // inferred from electronic annotation /// 0030054 // cell junction // inferred from electronic annotation /// 0045121 // membrane raft // inferred from direct assay /// 0045121 // membrane raft // inferred from electronic annotation …		chr12:50260679-50298000 (-) // 94.11 // q13.12
11754927_x_at	0	0	-1	0	1	down	PRKACB	5567	0005975 // carbohydrate metabolic process // traceable author statement /// 0006006 // glucose metabolic process // traceable author statement /// 0006094 // gluconeogenesis // traceable author statement /// 0006112 // energy reserve metabolic process // traceable author statement /// 0006468 // protein phosphorylation // inferred from direct assay /// 0006468 // protein phosphorylation // inferr…	0005634 // nucleus // inferred from electronic annotation /// 0005654 // nucleoplasm // traceable author statement /// 0005737 // cytoplasm // inferred from electronic annotation /// 0005813 // centrosome // inferred from direct assay /// 0005829 // cytosol // traceable author statement /// 0005886 // plasma membrane // inferred from electronic annotation /// 0005952 // cAMP-dependent protein kin…	0000166 // nucleotide binding // inferred from electronic annotation /// 0000287 // magnesium ion binding // inferred from direct assay /// 0004672 // protein kinase activity // inferred from electronic annotation /// 0004674 // protein serine/threonine kinase activity // inferred from electronic annotation /// 0004691 // cAMP-dependent protein kinase activity // inferred from direct assay /// 00…	chr1:84630322-84670977 (+) // 93.82 // p31.1
11733355_x_at	0.00431442	-0.00431442	-1.006	-0.00862884	1.006	down	C5AR1	728	0000187 // activation of MAPK activity // traceable author statement /// 0006935 // chemotaxis // traceable author statement /// 0006935 // chemotaxis // inferred from electronic annotation /// 0006955 // immune response // traceable author statement /// 0006968 // cellular defense response // traceable author statement /// 0007165 // signal transduction // traceable author statement /// 0007165 …	0005886 // plasma membrane // traceable author statement /// 0005886 // plasma membrane // inferred from electronic annotation /// 0005887 // integral to plasma membrane // traceable author statement /// 0016020 // membrane // inferred from electronic annotation /// 0016021 // integral to membrane // inferred from electronic annotation	0004871 // signal transducer activity // inferred from electronic annotation /// 0004872 // receptor activity // inferred from electronic annotation /// 0004930 // G-protein coupled receptor activity // inferred from electronic annotation /// 0004942 // anaphylatoxin receptor activity // inferred from electronic annotation /// 0004944 // C5a anaphylatoxin receptor activity // inferred from electr…	chr19:47813074-47825323 (+) // 71.91 // q13.32
11721523_s_at	0.0112534	-0.0112534	-1.01572	-0.0225067	1.01572	down	ZNF706	51123		0005622 // intracellular // inferred from electronic annotation	0008270 // zinc ion binding // inferred from electronic annotation /// 0046872 // metal ion binding // inferred from electronic annotation	chr8:102209271-102217960 (-) // 97.31 // q22.3
11743114_at	-0.0531597	0.0531597	1.07648	0.106319	1.07648	up	DHX15	1665	0006397 // mRNA processing // inferred from electronic annotation /// 0006397 // mRNA processing // traceable author statement /// 0008380 // RNA splicing // inferred by curator /// 0008380 // RNA splicing // inferred from electronic annotation	0005634 // nucleus // traceable author statement /// 0005634 // nucleus // inferred from electronic annotation /// 0005689 // U12-type spliceosomal complex // inferred from direct assay /// 0005730 // nucleolus // inferred from electronic annotation	0000166 // nucleotide binding // inferred from electronic annotation /// 0003676 // nucleic acid binding // inferred from electronic annotation /// 0003724 // RNA helicase activity // traceable author statement /// 0004386 // helicase activity // inferred from electronic annotation /// 0005524 // ATP binding // inferred from electronic annotation /// 0008026 // ATP-dependent helicase activity // …	chr4:24529097-24586226 (-) // 96.31 // p15.2
11722186_a_at	0.0372281	-0.0372281	-1.05296	-0.0744562	1.05296	down	AKT1	207	0000060 // protein import into nucleus, translocation // inferred from mutant phenotype /// 0001893 // maternal placenta development // inferred from electronic annotation /// 0001934 // positive regulation of protein phosphorylation // inferred from direct assay /// 0005975 // carbohydrate metabolic process // inferred from electronic annotation /// 0005977 // glycogen metabolic process // infer…	0005625 // soluble fraction // inferred from electronic annotation /// 0005634 // nucleus // inferred from direct assay /// 0005634 // nucleus // traceable author statement /// 0005634 // nucleus // inferred from electronic annotation /// 0005654 // nucleoplasm // traceable author statement /// 0005654 // nucleoplasm // inferred from electronic annotation /// 0005737 // cytoplasm // inferred from…	0000166 // nucleotide binding // inferred from electronic annotation /// 0004672 // protein kinase activity // traceable author statement /// 0004672 // protein kinase activity // inferred from electronic annotation /// 0004674 // protein serine/threonine kinase activity // inferred from direct assay /// 0004674 // protein serine/threonine kinase activity // traceable author statement /// 0004674…	chr14:105235685-105261441 (-) // 94.1 // q32.33
11720622_a_at	-0.014082	0.014082	1.01971	0.0281639	1.01971	up	CDK16	5127	0006468 // protein phosphorylation // non-traceable author statement /// 0006468 // protein phosphorylation // inferred from electronic annotation /// 0006468 // protein phosphorylation // traceable author statement /// 0007049 // cell cycle // inferred from electronic annotation /// 0016310 // phosphorylation // inferred from electronic annotation		0000166 // nucleotide binding // inferred from electronic annotation /// 0004672 // protein kinase activity // non-traceable author statement /// 0004672 // protein kinase activity // inferred from electronic annotation /// 0004674 // protein serine/threonine kinase activity // traceable author statement /// 0004674 // protein serine/threonine kinase activity // inferred from electronic annotatio…	chrX:47078075-47089396 (+) // 93.74 // p11.23
11737847_a_at	-0.197023	0.197023	1.31407	0.394047	1.31407	up	MR1	3140	0002474 // antigen processing and presentation of peptide antigen via MHC class I // inferred from electronic annotation /// 0006955 // immune response // inferred from electronic annotation /// 0006955 // immune response // traceable author statement /// 0019882 // antigen processing and presentation // inferred from electronic annotation	0005576 // extracellular region // inferred from electronic annotation /// 0005783 // endoplasmic reticulum // inferred from electronic annotation /// 0005886 // plasma membrane // inferred from electronic annotation /// 0016020 // membrane // inferred from electronic annotation /// 0016021 // integral to membrane // inferred from electronic annotation /// 0042612 // MHC class I protein complex /…	0032393 // MHC class I receptor activity // traceable author statement	chr1:181003104-181024633 (+) // 99.92 // q25.3
11738346_at	0.0493994	-0.0493994	-1.07088	-0.0987988	1.07088	down	ZNF713	349075	0006351 // transcription, DNA-dependent // inferred from electronic annotation /// 0006355 // regulation of transcription, DNA-dependent // inferred from electronic annotation	0005622 // intracellular // inferred from electronic annotation /// 0005634 // nucleus // inferred from electronic annotation	0003676 // nucleic acid binding // inferred from electronic annotation /// 0003677 // DNA binding // inferred from electronic annotation /// 0008270 // zinc ion binding // inferred from electronic annotation /// 0046872 // metal ion binding // inferred from electronic annotation	chr7:55980330-56008433 (+) // 75.8 // p11.2
11723580_at	-0.00985622	0.00985622	1.01376	0.0197124	1.01376	up	C6orf228	221710		0016020 // membrane // inferred from electronic annotation /// 0016021 // integral to membrane // inferred from electronic annotation	0003677 // DNA binding // inferred from electronic annotation	chr6:11094033-11138971 (+) // 76.8 // p24.2
11728834_x_at	-0.132637	0.132637	1.20187	0.265275	1.20187	up	C4orf32	132720		0016020 // membrane // inferred from electronic annotation /// 0016021 // integral to membrane // inferred from electronic annotation		chr4:113066522-113110237 (+) // 91.55 // q25
11735867_a_at	-0.0124531	0.0124531	1.01741	0.0249062	1.01741	up	C5orf46	389336		0005576 // extracellular region // inferred from electronic annotation		chr5:147272271-147286101 (-) // 87.39 // q32
11763325_a_at	-0.09726	0.09726	1.14434	0.19452	1.14434	up	FER	2241	0000226 // microtubule cytoskeleton organization // inferred from mutant phenotype /// 0000278 // mitotic cell cycle // inferred from mutant phenotype /// 0001932 // regulation of protein phosphorylation // inferred from sequence or structural similarity /// 0006468 // protein phosphorylation // traceable author statement /// 0006468 // protein phosphorylation // inferred from electronic annotati…	0000790 // nuclear chromatin // inferred from direct assay /// 0005634 // nucleus // inferred from direct assay /// 0005634 // nucleus // inferred from electronic annotation /// 0005737 // cytoplasm // inferred from direct assay /// 0005737 // cytoplasm // inferred from electronic annotation /// 0005829 // cytosol // traceable author statement /// 0005856 // cytoskeleton // inferred from electron…	0000166 // nucleotide binding // inferred from electronic annotation /// 0003779 // actin binding // inferred from electronic annotation /// 0004672 // protein kinase activity // inferred from electronic annotation /// 0004713 // protein tyrosine kinase activity // traceable author statement /// 0004713 // protein tyrosine kinase activity // inferred from electronic annotation /// 0004715 // non-…	chr5:108527194-108532539 (+) // 97.54 // q21.3
11737234_s_at	0.235794	-0.235794	-1.38663	-0.471587	1.38663	down	USP6	9098	0006464 // cellular protein modification process // non-traceable author statement /// 0006508 // proteolysis // inferred from electronic annotation /// 0006511 // ubiquitin-dependent protein catabolic process // inferred from electronic annotation /// 0016579 // protein deubiquitination // inferred from direct assay /// 0032313 // regulation of Rab GTPase activity // inferred from electronic ann…	0005622 // intracellular // inferred from electronic annotation /// 0005737 // cytoplasm // inferred from direct assay /// 0005737 // cytoplasm // inferred from electronic annotation /// 0005764 // lysosome // traceable author statement /// 0005768 // endosome // inferred from electronic annotation /// 0005886 // plasma membrane // inferred from direct assay /// 0005886 // plasma membrane // infe…	0003676 // nucleic acid binding // traceable author statement /// 0004197 // cysteine-type endopeptidase activity // traceable author statement /// 0004221 // ubiquitin thiolesterase activity // inferred from electronic annotation /// 0004843 // ubiquitin-specific protease activity // inferred from direct assay /// 0005097 // Rab GTPase activator activity // inferred from electronic annotation //…	chr17:5031686-5078339 (+) // 97.26 // p13.2
11756771_x_at	-0.0276232	0.0276232	1.03904	0.0552464	1.03904	up	SPTY2D1	144108				chr11:18627948-18634012 (-) // 95.06 // p15.1
11728637_a_at	-0.0287809	0.0287809	1.04071	0.0575619	1.04071	up	ATP5A1	498	0001937 // negative regulation of endothelial cell proliferation // inferred from mutant phenotype /// 0006172 // ADP biosynthetic process // inferred from electronic annotation /// 0006200 // ATP catabolic process // inferred from direct assay /// 0006200 // ATP catabolic process // inferred from electronic annotation /// 0006629 // lipid metabolic process // inferred from sequence or structural…	0000275 // mitochondrial proton-transporting ATP synthase complex, catalytic core F(1) // inferred from electronic annotation /// 0005739 // mitochondrion // inferred by curator /// 0005739 // mitochondrion // non-traceable author statement /// 0005739 // mitochondrion // inferred from electronic annotation /// 0005743 // mitochondrial inner membrane // inferred from direct assay /// 0005743 // m…	0000166 // nucleotide binding // inferred from electronic annotation /// 0005515 // protein binding // inferred from physical interaction /// 0005524 // ATP binding // inferred from sequence or structural similarity /// 0005524 // ATP binding // inferred from electronic annotation /// 0016820 // hydrolase activity, acting on acid anhydrides, catalyzing transmembrane movement of substances // infe…	chr18:43664112-43678287 (-) // 93.66 // q21.1
11722243_a_at	-0.0354078	0.035408	1.05031	0.0708158	1.05031	up	FBXO25	26260	0016567 // protein ubiquitination // inferred from sequence or structural similarity /// 0016567 // protein ubiquitination // non-traceable author statement /// 0016567 // protein ubiquitination // inferred from electronic annotation	0000151 // ubiquitin ligase complex // non-traceable author statement /// 0005634 // nucleus // inferred from sequence or structural similarity /// 0005634 // nucleus // inferred from electronic annotation /// 0019005 // SCF ubiquitin ligase complex // inferred from sequence or structural similarity	0003779 // actin binding // inferred from electronic annotation /// 0004842 // ubiquitin-protein ligase activity // non-traceable author statement	chr8:356807-419873 (+) // 95.1 // p23.3
11743732_a_at	-0.20828	0.20828	1.33474	0.416559	1.33474	up	RCAN1	1827	0006355 // regulation of transcription, DNA-dependent // traceable author statement /// 0007165 // signal transduction // traceable author statement /// 0007417 // central nervous system development // traceable author statement /// 0007519 // skeletal muscle tissue development // inferred from electronic annotation /// 0008015 // blood circulation // traceable author statement /// 0009612 // res…	0005634 // nucleus // inferred from electronic annotation /// 0005634 // nucleus // traceable author statement /// 0005737 // cytoplasm // inferred from electronic annotation	0003677 // DNA binding // traceable author statement /// 0003700 // sequence-specific DNA binding transcription factor activity // traceable author statement /// 0005515 // protein binding // inferred from physical interaction	chr21:35888789-35987510 (-) // 95.78 // q22.12
11724603_a_at	-0.0739903	0.0739903	1.10802	0.147981	1.10802	up	ZNF219	51222	0006351 // transcription, DNA-dependent // inferred from direct assay /// 0006351 // transcription, DNA-dependent // inferred from electronic annotation /// 0006351 // transcription, DNA-dependent // traceable author statement /// 0006355 // regulation of transcription, DNA-dependent // inferred from mutant phenotype /// 0006355 // regulation of transcription, DNA-dependent // traceable author st…	0005622 // intracellular // inferred from electronic annotation /// 0005634 // nucleus // inferred from direct assay /// 0005634 // nucleus // inferred from electronic annotation /// 0016021 // integral to membrane // inferred from electronic annotation	0003676 // nucleic acid binding // inferred from electronic annotation /// 0003677 // DNA binding // inferred from direct assay /// 0003677 // DNA binding // inferred from electronic annotation /// 0003700 // sequence-specific DNA binding transcription factor activity // inferred from direct assay /// 0003700 // sequence-specific DNA binding transcription factor activity // traceable author state…	chr14:21558236-21566808 (-) // 88.24 // q11.2
11764222_at	0	0	-1	0	1	down						chr2:39011611-39012122 (-) // 83.98 // p22.1
11722426_a_at	0	0	-1	0	1	down	FGL2	10875	0007165 // signal transduction // inferred from electronic annotation	0005576 // extracellular region // inferred from electronic annotation /// 0005577 // fibrinogen complex // traceable author statement /// 0005615 // extracellular space // inferred from electronic annotation	0005102 // receptor binding // inferred from electronic annotation	chr7:76822675-76829201 (-) // 84.6 // q11.23
11757396_s_at	-0.21649	0.21649	1.35002	0.43298	1.35002	up	ANXA8 /// ANXA8L1 /// ANXA8L2	244 /// 653145 /// 728113	0007596 // blood coagulation // inferred from electronic annotation /// 0007599 // hemostasis // inferred from electronic annotation		0005509 // calcium ion binding // inferred from electronic annotation /// 0005544 // calcium-dependent phospholipid binding // inferred from electronic annotation /// 0046872 // metal ion binding // inferred from electronic annotation	chr10:47157982-47158897 (-) // 84.59 // q11.22
11758071_s_at	-0.0102382	0.0102382	1.01429	0.0204763	1.01429	up	SULF1	23213	0001822 // kidney development // inferred from sequence or structural similarity /// 0001822 // kidney development // inferred from electronic annotation /// 0001937 // negative regulation of endothelial cell proliferation // inferred from direct assay /// 0002063 // chondrocyte development // inferred from sequence or structural similarity /// 0002063 // chondrocyte development // inferred from …	0005615 // extracellular space // inferred from direct assay /// 0005615 // extracellular space // non-traceable author statement /// 0005783 // endoplasmic reticulum // inferred from direct assay /// 0005783 // endoplasmic reticulum // inferred from electronic annotation /// 0005794 // Golgi apparatus // inferred from sequence or structural similarity /// 0005794 // Golgi apparatus // inferred f…	0003824 // catalytic activity // inferred from electronic annotation /// 0004065 // arylsulfatase activity // inferred from direct assay /// 0004065 // arylsulfatase activity // inferred from mutant phenotype /// 0005509 // calcium ion binding // inferred from electronic annotation /// 0008449 // N-acetylglucosamine-6-sulfatase activity // inferred from direct assay /// 0008449 // N-acetylglucosa…	chr8:70571572-70572292 (+) // 98.49 // q13.3
11762015_at	0	0	-1	0	1	down	EPB41L4A	64097		0005737 // cytoplasm // inferred from electronic annotation /// 0005856 // cytoskeleton // inferred from electronic annotation /// 0019898 // extrinsic to membrane // inferred from electronic annotation	0008092 // cytoskeletal protein binding // inferred from electronic annotation	chr5:111599122-111755010 (-) // 86.01 // q22.2
11764105_at	0.0894597	-0.0894594	-1.13204	-0.178919	1.13204	down						chr7:48122624-48123183 (-) // 57.22 // p12.3
11727897_a_at	0.0014286	-0.0014286	-1.00198	-0.00285721	1.00198	down	NAA38	51691	0000398 // nuclear mRNA splicing, via spliceosome // non-traceable author statement /// 0006397 // mRNA processing // inferred from electronic annotation /// 0008380 // RNA splicing // inferred from electronic annotation	0005634 // nucleus // non-traceable author statement /// 0005634 // nucleus // inferred from electronic annotation /// 0030529 // ribonucleoprotein complex // inferred from electronic annotation	0003723 // RNA binding // inferred from electronic annotation /// 0005515 // protein binding // inferred from physical interaction /// 0017070 // U6 snRNA binding // non-traceable author statement	chr7:117824085-117833660 (+) // 83.17 // q31.31
11732797_x_at	0.0406384	-0.0406384	-1.05795	-0.0812769	1.05795	down	KIAA1841	84542				chr2:61293004-61351411 (+) // 89.75 // p16.1
11761694_at	-0.00303841	0.00303841	1.00422	0.00607681	1.00422	up	LOC100289424	100289424				chr10:134777218-134778783 (-) // 76.68 // q26.3
11745160_s_at	0.0257032	-0.025703	-1.03627	-0.0514061	1.03627	down	TGFA	7039	0000165 // MAPK cascade // inferred from direct assay /// 0000187 // activation of MAPK activity // inferred from direct assay /// 0001525 // angiogenesis // inferred from electronic annotation /// 0001934 // positive regulation of protein phosphorylation // inferred from electronic annotation /// 0006916 // anti-apoptosis // inferred from electronic annotation /// 0007173 // epidermal growth fac…	0005576 // extracellular region // inferred from electronic annotation /// 0005615 // extracellular space // inferred from direct assay /// 0005615 // extracellular space // inferred from electronic annotation /// 0005634 // nucleus // inferred from electronic annotation /// 0005886 // plasma membrane // inferred from electronic annotation /// 0005886 // plasma membrane // non-traceable author st…	0001948 // glycoprotein binding // inferred from electronic annotation /// 0004708 // MAP kinase kinase activity // inferred from direct assay /// 0005154 // epidermal growth factor receptor binding // inferred from direct assay /// 0005154 // epidermal growth factor receptor binding // inferred from electronic annotation /// 0005515 // protein binding // inferred from physical interaction /// 00…	chr2:70676450-70780904 (-) // 100.0 // p13.3
11737647_at	-0.0432591	0.0432591	1.0618	0.0865183	1.0618	up	EFCAB4B	84766	0002115 // store-operated calcium entry // inferred from mutant phenotype /// 0006810 // transport // inferred from electronic annotation /// 0006811 // ion transport // inferred from electronic annotation /// 0006816 // calcium ion transport // inferred from electronic annotation /// 0032237 // activation of store-operated calcium channel activity // inferred from mutant phenotype /// 0051928 //…	0005634 // nucleus // inferred from direct assay /// 0005730 // nucleolus // inferred from direct assay /// 0005737 // cytoplasm // inferred from direct assay /// 0005737 // cytoplasm // inferred from electronic annotation /// 0005794 // Golgi apparatus // inferred from direct assay	0005509 // calcium ion binding // inferred from direct assay /// 0005509 // calcium ion binding // inferred from electronic annotation /// 0005515 // protein binding // inferred from physical interaction	chr12:3749553-3862366 (-) // 94.39 // p13.32
11733277_a_at	-0.0377307	0.0377307	1.0537	0.0754614	1.0537	up	SLC2A2	6514	0005975 // carbohydrate metabolic process // traceable author statement /// 0006112 // energy reserve metabolic process // traceable author statement /// 0006810 // transport // inferred from electronic annotation /// 0008643 // carbohydrate transport // inferred from electronic annotation /// 0008645 // hexose transport // traceable author statement /// 0009749 // response to glucose stimulus //…	0005624 // membrane fraction // traceable author statement /// 0005737 // cytoplasm // inferred from electronic annotation /// 0005768 // endosome // inferred from electronic annotation /// 0005829 // cytosol // inferred from electronic annotation /// 0005886 // plasma membrane // traceable author statement /// 0005886 // plasma membrane // inferred from electronic annotation /// 0005887 // integ…	0005158 // insulin receptor binding // inferred from electronic annotation /// 0005215 // transporter activity // inferred from electronic annotation /// 0005355 // glucose transmembrane transporter activity // not recorded /// 0005355 // glucose transmembrane transporter activity // inferred from electronic annotation /// 0005355 // glucose transmembrane transporter activity // traceable author …	chr3:170713801-170744768 (-) // 99.31 // q26.2
11730952_a_at	-0.0166211	0.0166211	1.02331	0.0332422	1.02331	up	PDK3	5165	0000160 // two-component signal transduction system (phosphorelay) // inferred from electronic annotation /// 0005975 // carbohydrate metabolic process // inferred from electronic annotation /// 0006006 // glucose metabolic process // inferred from electronic annotation /// 0006006 // glucose metabolic process // traceable author statement /// 0006090 // pyruvate metabolic process // traceable au…	0005739 // mitochondrion // traceable author statement /// 0005739 // mitochondrion // inferred from electronic annotation /// 0005759 // mitochondrial matrix // traceable author statement /// 0005759 // mitochondrial matrix // inferred from electronic annotation	0000155 // two-component sensor activity // inferred from electronic annotation /// 0000166 // nucleotide binding // inferred from electronic annotation /// 0004672 // protein kinase activity // inferred from direct assay /// 0004672 // protein kinase activity // traceable author statement /// 0004673 // protein histidine kinase activity // inferred from electronic annotation /// 0004740 // pyruv…	chrX:24483343-24558207 (+) // 99.17 // p22.11
11718170_a_at	-0.138285	0.138285	1.21131	0.276569	1.21131	up	MLL4	9757	0006351 // transcription, DNA-dependent // inferred from electronic annotation /// 0006355 // regulation of transcription, DNA-dependent // inferred from electronic annotation /// 0016568 // chromatin modification // inferred from electronic annotation /// 0032259 // methylation // inferred from electronic annotation /// 0048096 // chromatin-mediated maintenance of transcription // non-traceable …	0005634 // nucleus // inferred from direct assay /// 0005634 // nucleus // non-traceable author statement /// 0005634 // nucleus // inferred from electronic annotation /// 0035097 // histone methyltransferase complex // inferred from direct assay /// 0035097 // histone methyltransferase complex // inferred from electronic annotation	0003677 // DNA binding // inferred from electronic annotation /// 0003700 // sequence-specific DNA binding transcription factor activity // non-traceable author statement /// 0005515 // protein binding // inferred from physical interaction /// 0008168 // methyltransferase activity // inferred from electronic annotation /// 0008270 // zinc ion binding // non-traceable author statement /// 0008270 …	chr19:36208910-36229779 (+) // 94.07 // q13.12
11731567_a_at	0.0732021	-0.0732021	-1.10681	-0.146404	1.10681	down	MDM2	4193	0000075 // cell cycle checkpoint // traceable author statement /// 0000122 // negative regulation of transcription from RNA polymerase II promoter // inferred from direct assay /// 0006461 // protein complex assembly // inferred from direct assay /// 0006977 // DNA damage response, signal transduction by p53 class mediator resulting in cell cycle arrest // inferred from mutant phenotype /// 00069…	0005622 // intracellular // inferred from electronic annotation /// 0005634 // nucleus // inferred from direct assay /// 0005634 // nucleus // inferred from electronic annotation /// 0005634 // nucleus // inferred from mutant phenotype /// 0005654 // nucleoplasm // inferred from direct assay /// 0005654 // nucleoplasm // traceable author statement /// 0005654 // nucleoplasm // inferred from elect…	0002039 // p53 binding // inferred from physical interaction /// 0002039 // p53 binding // inferred from electronic annotation /// 0004842 // ubiquitin-protein ligase activity // inferred from direct assay /// 0004842 // ubiquitin-protein ligase activity // inferred from mutant phenotype /// 0004842 // ubiquitin-protein ligase activity // inferred from electronic annotation /// 0005515 // protein…	chr12:69201965-69239321 (+) // 78.58 // q15
11720947_x_at	-0.116188	0.116188	1.17477	0.232376	1.17477	up	CA12	771	0006730 // one-carbon metabolic process // inferred from electronic annotation	0016020 // membrane // inferred from electronic annotation /// 0016021 // integral to membrane // inferred from electronic annotation /// 0016021 // integral to membrane // traceable author statement	0004089 // carbonate dehydratase activity // inferred from electronic annotation /// 0004089 // carbonate dehydratase activity // traceable author statement /// 0008270 // zinc ion binding // inferred from electronic annotation /// 0008270 // zinc ion binding // traceable author statement /// 0016829 // lyase activity // inferred from electronic annotation /// 0046872 // metal ion binding // infe…	chr15:63614615-63674659 (-) // 87.76 // q22.2
11733669_a_at	0.0897846	-0.0897846	-1.13255	-0.179569	1.13255	down	PAX3	5077	0000435 // positive regulation of transcription from RNA polymerase II promoter by galactose // inferred from direct assay /// 0000435 // positive regulation of transcription from RNA polymerase II promoter by galactose // inferred from electronic annotation /// 0001755 // neural crest cell migration // inferred from electronic annotation /// 0001843 // neural tube closure // inferred from electr…	0000790 // nuclear chromatin // inferred from direct assay /// 0005634 // nucleus // inferred from electronic annotation /// 0005654 // nucleoplasm // traceable author statement	0003677 // DNA binding // inferred from electronic annotation /// 0003682 // chromatin binding // inferred from electronic annotation /// 0003700 // sequence-specific DNA binding transcription factor activity // inferred from electronic annotation /// 0003700 // sequence-specific DNA binding transcription factor activity // traceable author statement /// 0003705 // RNA polymerase II distal enhanc…	chr2:223158348-223163700 (-) // 93.5 // q36.1
11750492_a_at	0.0258703	-0.0258703	-1.03651	-0.0517406	1.03651	down	RNF216	54476	0006915 // apoptotic process // inferred from electronic annotation /// 0016567 // protein ubiquitination // inferred from electronic annotation /// 0032648 // regulation of interferon-beta production // inferred from direct assay /// 0043161 // proteasomal ubiquitin-dependent protein catabolic process // inferred from direct assay /// 0044419 // interspecies interaction between organisms // infe…	0005634 // nucleus // inferred from direct assay /// 0005730 // nucleolus // inferred from direct assay /// 0005737 // cytoplasm // inferred from direct assay /// 0005737 // cytoplasm // inferred from electronic annotation	0005515 // protein binding // inferred from physical interaction /// 0008270 // zinc ion binding // inferred from electronic annotation /// 0016874 // ligase activity // inferred from electronic annotation /// 0046872 // metal ion binding // inferred from electronic annotation	chr7:5662209-5821257 (-) // 99.92 // p22.1
11754372_x_at	0.146266	-0.146265	-1.22479	-0.292531	1.22479	down	CERS4	79603	0006355 // regulation of transcription, DNA-dependent // inferred from electronic annotation /// 0006665 // sphingolipid metabolic process // traceable author statement /// 0008610 // lipid biosynthetic process // inferred from electronic annotation /// 0030148 // sphingolipid biosynthetic process // traceable author statement /// 0030148 // sphingolipid biosynthetic process // inferred from elec…	0005634 // nucleus // inferred from electronic annotation /// 0005783 // endoplasmic reticulum // inferred from electronic annotation /// 0005789 // endoplasmic reticulum membrane // traceable author statement /// 0005789 // endoplasmic reticulum membrane // inferred from electronic annotation /// 0016020 // membrane // inferred from electronic annotation /// 0016021 // integral to membrane // in…	0003677 // DNA binding // inferred from electronic annotation /// 0003700 // sequence-specific DNA binding transcription factor activity // inferred from electronic annotation /// 0043565 // sequence-specific DNA binding // inferred from electronic annotation /// 0050291 // sphingosine N-acyltransferase activity // inferred from electronic annotation	chr19:8315409-8327305 (+) // 87.21 // p13.2
11753119_x_at	-0.00962639	0.00962591	1.01343	0.0192523	1.01343	up	CMTM5	116173	0006935 // chemotaxis // inferred from electronic annotation	0005615 // extracellular space // inferred from electronic annotation /// 0016020 // membrane // inferred from electronic annotation /// 0016021 // integral to membrane // inferred from electronic annotation	0005125 // cytokine activity // inferred from electronic annotation	chr14:23846254-23848980 (+) // 96.99 // q11.2
11755632_a_at	0.0709565	-0.0709565	-1.10337	-0.141913	1.10337	down	MYH14	79784	0007411 // axon guidance // traceable author statement /// 0008360 // regulation of cell shape // inferred from electronic annotation /// 0030048 // actin filament-based movement // inferred from electronic annotation	0001725 // stress fiber // inferred from electronic annotation /// 0005737 // cytoplasm // inferred from electronic annotation /// 0016459 // myosin complex // inferred from electronic annotation /// 0030424 // axon // inferred from electronic annotation /// 0030426 // growth cone // inferred from electronic annotation	0000146 // microfilament motor activity // inferred from electronic annotation /// 0000166 // nucleotide binding // inferred from electronic annotation /// 0003774 // motor activity // inferred from electronic annotation /// 0003779 // actin binding // inferred from electronic annotation /// 0005516 // calmodulin binding // inferred from electronic annotation /// 0005524 // ATP binding // inferre…	chr19:50783290-50813796 (+) // 92.75 // q13.33
11755668_s_at	-0.149854	0.149854	1.23089	0.299707	1.23089	up	ATP5J2-PTCD1 /// PTCD1	100526740 /// 26024				chr7:99016756-99036377 (-) // 99.84 // q22.1
11717584_a_at	0.0478272	-0.0478272	-1.06855	-0.0956545	1.06855	down	VAPB	9217	0006665 // sphingolipid metabolic process // traceable author statement /// 0006874 // cellular calcium ion homeostasis // inferred from mutant phenotype /// 0006986 // response to unfolded protein // inferred from electronic annotation /// 0006987 // activation of signaling protein activity involved in unfolded protein response // inferred from direct assay /// 0008219 // cell death // inferred …	0005783 // endoplasmic reticulum // inferred from direct assay /// 0005783 // endoplasmic reticulum // inferred from electronic annotation /// 0005789 // endoplasmic reticulum membrane // inferred from direct assay /// 0005789 // endoplasmic reticulum membrane // traceable author statement /// 0005789 // endoplasmic reticulum membrane // inferred from electronic annotation /// 0005794 // Golgi ap…	0005198 // structural molecule activity // inferred from electronic annotation /// 0005515 // protein binding // inferred from physical interaction /// 0019899 // enzyme binding // inferred from physical interaction /// 0042803 // protein homodimerization activity // inferred from physical interaction /// 0046982 // protein heterodimerization activity // inferred from physical interaction /// 004…	chr20:56964174-57022672 (+) // 94.01 // q13.32
11755180_x_at	0.188303	-0.188303	-1.29828	-0.376607	1.29828	down	TCF7	6932	0006351 // transcription, DNA-dependent // inferred from electronic annotation /// 0006355 // regulation of transcription, DNA-dependent // not recorded /// 0006355 // regulation of transcription, DNA-dependent // inferred from electronic annotation /// 0006357 // regulation of transcription from RNA polymerase II promoter // not recorded /// 0006357 // regulation of transcription from RNA polyme…	0005634 // nucleus // inferred from direct assay /// 0005634 // nucleus // inferred from electronic annotation /// 0005667 // transcription factor complex // not recorded	0003677 // DNA binding // inferred from electronic annotation /// 0003682 // chromatin binding // not recorded /// 0003700 // sequence-specific DNA binding transcription factor activity // not recorded /// 0003700 // sequence-specific DNA binding transcription factor activity // inferred from electronic annotation /// 0005515 // protein binding // inferred from physical interaction /// 0008013 //…	chr5:133476225-133483927 (+) // 89.4 // q31.1
11732370_a_at	0.0583577	-0.0583577	-1.08426	-0.116715	1.08426	down	CUX1	1523	0000122 // negative regulation of transcription from RNA polymerase II promoter // inferred from electronic annotation /// 0000122 // negative regulation of transcription from RNA polymerase II promoter // traceable author statement /// 0000301 // retrograde transport, vesicle recycling within Golgi // inferred from electronic annotation /// 0006351 // transcription, DNA-dependent // inferred fro…	0000139 // Golgi membrane // inferred from electronic annotation /// 0005634 // nucleus // inferred from direct assay /// 0005634 // nucleus // inferred from electronic annotation /// 0005730 // nucleolus // inferred from direct assay /// 0005737 // cytoplasm // inferred from direct assay /// 0005794 // Golgi apparatus // inferred from electronic annotation /// 0016020 // membrane // inferred fro…	0003677 // DNA binding // inferred from electronic annotation /// 0003682 // chromatin binding // inferred from electronic annotation /// 0003700 // sequence-specific DNA binding transcription factor activity // inferred from electronic annotation /// 0030674 // protein binding, bridging // inferred from electronic annotation /// 0043565 // sequence-specific DNA binding // inferred from electroni…	chr7:101559392-101894560 (+) // 96.23 // q22.1
11747698_x_at	0.106833	-0.106833	-1.15963	-0.213665	1.15963	down	TCF4	6925	0000122 // negative regulation of transcription from RNA polymerase II promoter // inferred from electronic annotation /// 0006351 // transcription, DNA-dependent // inferred from electronic annotation /// 0006352 // transcription initiation, DNA-dependent // inferred from sequence or structural similarity /// 0006355 // regulation of transcription, DNA-dependent // inferred from electronic annot…	0005634 // nucleus // inferred from direct assay /// 0005634 // nucleus // inferred from electronic annotation /// 0005667 // transcription factor complex // inferred from sequence or structural similarity /// 0005667 // transcription factor complex // inferred from electronic annotation	0000978 // RNA polymerase II core promoter proximal region sequence-specific DNA binding // inferred from sequence or structural similarity /// 0001011 // sequence-specific DNA binding RNA polymerase recruiting transcription factor activity // inferred from sequence or structural similarity /// 0001077 // RNA polymerase II core promoter proximal region sequence-specific DNA binding transcription …	chr18:52895094-53089743 (-) // 97.67 // q21.2
11729167_a_at	0	0	-1	0	1	down	DCTD	1635	0006206 // pyrimidine base metabolic process // traceable author statement /// 0006220 // pyrimidine nucleotide metabolic process // traceable author statement /// 0008152 // metabolic process // inferred from electronic annotation /// 0009165 // nucleotide biosynthetic process // inferred from electronic annotation /// 0044281 // small molecule metabolic process // traceable author statement ///…	0005829 // cytosol // traceable author statement	0003824 // catalytic activity // inferred from electronic annotation /// 0004132 // dCMP deaminase activity // not recorded /// 0004132 // dCMP deaminase activity // inferred from electronic annotation /// 0004132 // dCMP deaminase activity // traceable author statement /// 0008270 // zinc ion binding // inferred from electronic annotation /// 0016787 // hydrolase activity // inferred from electr…	chr4:183811246-183838747 (-) // 96.16 // q35.1
11721598_a_at	-0.116143	0.116143	1.17469	0.232285	1.17469	up	EFS	10278	0007155 // cell adhesion // inferred from electronic annotation /// 0035556 // intracellular signal transduction // traceable author statement	0005737 // cytoplasm // traceable author statement	0017124 // SH3 domain binding // inferred from electronic annotation /// 0019904 // protein domain specific binding // inferred from physical interaction	chr14:23825610-23834961 (-) // 96.0 // q11.2
11740575_a_at	0.0580061	-0.0580063	-1.08374	-0.116012	1.08374	down	SORCS1	114815	0007218 // neuropeptide signaling pathway // non-traceable author statement	0016020 // membrane // inferred from direct assay /// 0016020 // membrane // inferred from electronic annotation /// 0016021 // integral to membrane // inferred from electronic annotation	0004872 // receptor activity // inferred from electronic annotation /// 0005515 // protein binding // inferred from physical interaction /// 0008188 // neuropeptide receptor activity // non-traceable author statement	chr10:108333420-108924466 (-) // 94.17 // q25.1
11758323_s_at	0.0296521	-0.0296521	-1.04196	-0.0593042	1.04196	down	VOPP1	81552	0006351 // transcription, DNA-dependent // inferred from electronic annotation /// 0006355 // regulation of transcription, DNA-dependent // inferred from electronic annotation /// 0007165 // signal transduction // inferred from mutant phenotype	0005768 // endosome // inferred from direct assay /// 0016020 // membrane // inferred from electronic annotation /// 0016021 // integral to membrane // inferred from electronic annotation /// 0030659 // cytoplasmic vesicle membrane // inferred from direct assay /// 0030659 // cytoplasmic vesicle membrane // inferred from electronic annotation /// 0031301 // integral to organelle membrane // infer…	0004871 // signal transducer activity // inferred from mutant phenotype	chr1:148193220-148194190 (+) // 94.3 // q21.2 /// chr7:55540213-55640134 (-) // 90.13 // p11.2
11732556_a_at	-0.0973713	0.0973716	1.14452	0.194743	1.14452	up	FASLG	356	0000122 // negative regulation of transcription from RNA polymerase II promoter // inferred from direct assay /// 0006351 // transcription, DNA-dependent // inferred from electronic annotation /// 0006355 // regulation of transcription, DNA-dependent // inferred from electronic annotation /// 0006915 // apoptotic process // traceable author statement /// 0006915 // apoptotic process // inferred f…	0005576 // extracellular region // traceable author statement /// 0005576 // extracellular region // inferred from electronic annotation /// 0005615 // extracellular space // inferred from direct assay /// 0005615 // extracellular space // inferred from electronic annotation /// 0005634 // nucleus // inferred from direct assay /// 0005634 // nucleus // inferred from electronic annotation /// 0005…	0005102 // receptor binding // traceable author statement /// 0005125 // cytokine activity // inferred from electronic annotation /// 0005164 // tumor necrosis factor receptor binding // inferred from electronic annotation /// 0005515 // protein binding // inferred from physical interaction	chr1:172628147-172636013 (+) // 88.62 // q24.3
11734601_at	-0.0163684	0.0163684	1.02295	0.0327368	1.02295	up	TAS2R43 /// TAS2R45	259289 /// 259291	0001580 // detection of chemical stimulus involved in sensory perception of bitter taste // inferred from direct assay /// 0007165 // signal transduction // inferred from electronic annotation /// 0007186 // G-protein coupled receptor signaling pathway // inferred by curator /// 0007186 // G-protein coupled receptor signaling pathway // inferred from electronic annotation /// 0050896 // response …	0005886 // plasma membrane // inferred from electronic annotation /// 0005929 // cilium // inferred from electronic annotation /// 0016020 // membrane // inferred from electronic annotation /// 0016021 // integral to membrane // inferred by curator /// 0016021 // integral to membrane // inferred from electronic annotation /// 0031514 // motile cilium // inferred from direct assay /// 0042995 // c…	0004871 // signal transducer activity // inferred from electronic annotation /// 0004872 // receptor activity // inferred from electronic annotation /// 0004930 // G-protein coupled receptor activity // inferred from electronic annotation /// 0008527 // taste receptor activity // inferred from direct assay /// 0033038 // bitter taste receptor activity // inferred from direct assay	chr12:11243929-11244918 (-) // 82.6 // p13.2
11736569_at	-0.228889	0.228889	1.37342	0.457778	1.37342	up	PON1	5444	0006629 // lipid metabolic process // inferred from electronic annotation /// 0008203 // cholesterol metabolic process // inferred from electronic annotation /// 0009605 // response to external stimulus // non-traceable author statement /// 0009636 // response to toxin // inferred from electronic annotation /// 0010875 // positive regulation of cholesterol efflux // inferred from direct assay ///…	0005576 // extracellular region // non-traceable author statement /// 0005576 // extracellular region // inferred from electronic annotation /// 0005615 // extracellular space // inferred from direct assay /// 0005615 // extracellular space // inferred from electronic annotation /// 0005792 // microsome // inferred from electronic annotation /// 0034364 // high-density lipoprotein particle // inf…	0004063 // aryldialkylphosphatase activity // inferred from direct assay /// 0004063 // aryldialkylphosphatase activity // inferred from electronic annotation /// 0004064 // arylesterase activity // inferred from direct assay /// 0004064 // arylesterase activity // non-traceable author statement /// 0004064 // arylesterase activity // inferred from electronic annotation /// 0005509 // calcium ion…	chr7:94926987-94954019 (-) // 93.67 // q21.3
11733011_x_at	0.104231	-0.104231	-1.15546	-0.208462	1.15546	down	SLC44A4	80736	0055085 // transmembrane transport // traceable author statement	0005886 // plasma membrane // traceable author statement /// 0016020 // membrane // inferred from electronic annotation /// 0016021 // integral to membrane // inferred from electronic annotation		chr6:31830973-31846823 (-) // 87.5 // p21.33
11752496_a_at	-0.0190134	0.0190134	1.02671	0.0380268	1.02671	up	GAS7	8522	0006355 // regulation of transcription, DNA-dependent // traceable author statement /// 0007050 // cell cycle arrest // traceable author statement /// 0007275 // multicellular organismal development // inferred from electronic annotation /// 0007399 // nervous system development // inferred from electronic annotation /// 0008360 // regulation of cell shape // inferred from electronic annotation /…	0001726 // ruffle // inferred from electronic annotation /// 0005737 // cytoplasm // inferred from electronic annotation /// 0005884 // actin filament // inferred from electronic annotation	0003700 // sequence-specific DNA binding transcription factor activity // traceable author statement /// 0051015 // actin filament binding // inferred from electronic annotation	chr17:9819241-9939878 (-) // 99.9 // p13.1
11744093_a_at	0.0921988	-0.0921988	-1.13634	-0.184398	1.13634	down	EEF1A2	1917	0006184 // GTP catabolic process // inferred from electronic annotation /// 0006412 // translation // non-traceable author statement /// 0006412 // translation // inferred from electronic annotation /// 0006414 // translational elongation // inferred from electronic annotation /// 0006916 // anti-apoptosis // inferred from electronic annotation /// 0010035 // response to inorganic substance // in…	0005634 // nucleus // inferred from electronic annotation /// 0005737 // cytoplasm // inferred from electronic annotation /// 0005853 // eukaryotic translation elongation factor 1 complex // inferred from electronic annotation /// 0043025 // neuronal cell body // inferred from electronic annotation	0000166 // nucleotide binding // inferred from electronic annotation /// 0003746 // translation elongation factor activity // inferred from electronic annotation /// 0003924 // GTPase activity // inferred from electronic annotation /// 0005525 // GTP binding // inferred from electronic annotation /// 0008135 // translation factor activity, nucleic acid binding // non-traceable author statement	chr20:62119364-62130668 (-) // 86.17 // q13.33
11733928_a_at	-0.103673	0.103673	1.15456	0.207347	1.15456	up	ARMC8	25852				chr3:137906147-137965728 (+) // 94.37 // q22.3
11746668_a_at	0.118099	-0.118099	-1.17788	-0.236198	1.17788	down	ALDH9A1	223	0001822 // kidney development // inferred from electronic annotation /// 0001889 // liver development // inferred from electronic annotation /// 0006081 // cellular aldehyde metabolic process // inferred from direct assay /// 0008152 // metabolic process // inferred from electronic annotation /// 0009437 // carnitine metabolic process // inferred from electronic annotation /// 0034641 // cellular…	0005737 // cytoplasm // inferred from direct assay /// 0005737 // cytoplasm // traceable author statement /// 0005737 // cytoplasm // inferred from electronic annotation /// 0005739 // mitochondrion // inferred from electronic annotation /// 0005829 // cytosol // traceable author statement /// 0005829 // cytosol // inferred from electronic annotation /// 0005886 // plasma membrane // inferred fro…	0004028 // 3-chloroallyl aldehyde dehydrogenase activity // traceable author statement /// 0004029 // aldehyde dehydrogenase (NAD) activity // inferred from direct assay /// 0004029 // aldehyde dehydrogenase (NAD) activity // inferred from electronic annotation /// 0016491 // oxidoreductase activity // inferred from electronic annotation /// 0016620 // oxidoreductase activity, acting on the aldeh…	chr1:165637910-165667823 (-) // 88.96 // q24.1
11727335_a_at	-0.146183	0.146183	1.22465	0.292366	1.22465	up	ACMSD	130013	0006569 // tryptophan catabolic process // traceable author statement /// 0008152 // metabolic process // inferred from electronic annotation /// 0034641 // cellular nitrogen compound metabolic process // traceable author statement /// 0044281 // small molecule metabolic process // traceable author statement /// 0046874 // quinolinate metabolic process // inferred from direct assay	0005829 // cytosol // inferred from direct assay	0001760 // aminocarboxymuconate-semialdehyde decarboxylase activity // inferred from direct assay /// 0001760 // aminocarboxymuconate-semialdehyde decarboxylase activity // inferred from electronic annotation /// 0003824 // catalytic activity // inferred from electronic annotation /// 0016829 // lyase activity // inferred from electronic annotation /// 0016831 // carboxy-lyase activity // inferre…	chr2:135596185-135659645 (+) // 98.38 // q21.3
11737440_a_at	0.0729852	-0.0729852	-1.10647	-0.14597	1.10647	down	BMF	90427	0006915 // apoptotic process // inferred from sequence or structural similarity /// 0006915 // apoptotic process // traceable author statement /// 0006915 // apoptotic process // inferred from electronic annotation /// 0008629 // induction of apoptosis by intracellular signals // traceable author statement /// 0008633 // activation of pro-apoptotic gene products // traceable author statement /// …	0001669 // acrosomal vesicle // inferred from electronic annotation /// 0005737 // cytoplasm // inferred from electronic annotation /// 0005741 // mitochondrial outer membrane // traceable author statement /// 0005829 // cytosol // traceable author statement /// 0005886 // plasma membrane // traceable author statement /// 0015629 // actin cytoskeleton // inferred from electronic annotation /// 00…	0005515 // protein binding // inferred from physical interaction	chr15:40380093-40398649 (-) // 95.53 // q15.1
11723103_x_at	-0.11197	0.11197	1.16792	0.22394	1.16792	up	GNB4	59345	0006112 // energy reserve metabolic process // traceable author statement /// 0007165 // signal transduction // inferred from electronic annotation /// 0044281 // small molecule metabolic process // traceable author statement /// 0071377 // cellular response to glucagon stimulus // traceable author statement	0005886 // plasma membrane // traceable author statement	0004871 // signal transducer activity // inferred from electronic annotation	chr3:179113610-179169378 (-) // 82.48 // q26.33
11746836_a_at	-0.105963	0.105963	1.15823	0.211926	1.15823	up	TMEFF2	23671		0005576 // extracellular region // inferred from electronic annotation /// 0016020 // membrane // inferred from electronic annotation /// 0016021 // integral to membrane // non-traceable author statement /// 0016021 // integral to membrane // inferred from electronic annotation		chr2:192813774-193059642 (-) // 97.2 // q32.3
11759529_at	0.0316658	-0.0316656	-1.04488	-0.0633314	1.04488	down	ZC3H15	55854	0019221 // cytokine-mediated signaling pathway // inferred from electronic annotation	0005634 // nucleus // inferred from direct assay /// 0005634 // nucleus // inferred from electronic annotation /// 0005730 // nucleolus // inferred from direct assay /// 0005737 // cytoplasm // inferred from direct assay /// 0005737 // cytoplasm // inferred from electronic annotation	0003676 // nucleic acid binding // inferred from electronic annotation /// 0005515 // protein binding // inferred from physical interaction /// 0008270 // zinc ion binding // inferred from electronic annotation /// 0046872 // metal ion binding // inferred from electronic annotation	chr2:187350884-187374697 (+) // 95.33 // q32.1
11725792_a_at	-0.0673833	0.0673833	1.09792	0.134767	1.09792	up	MRE11A	4361	0000019 // regulation of mitotic recombination // traceable author statement /// 0000075 // cell cycle checkpoint // inferred from electronic annotation /// 0000724 // double-strand break repair via homologous recombination // traceable author statement /// 0006259 // DNA metabolic process // inferred from electronic annotation /// 0006281 // DNA repair // traceable author statement /// 0006281 /…	0000781 // chromosome, telomeric region // inferred from direct assay /// 0000790 // nuclear chromatin // inferred from electronic annotation /// 0000794 // condensed nuclear chromosome // inferred from electronic annotation /// 0005634 // nucleus // inferred from direct assay /// 0005634 // nucleus // inferred from electronic annotation /// 0005634 // nucleus // traceable author statement /// 00…	0000014 // single-stranded DNA specific endodeoxyribonuclease activity // traceable author statement /// 0003677 // DNA binding // inferred from direct assay /// 0003690 // double-stranded DNA binding // traceable author statement /// 0004003 // ATP-dependent DNA helicase activity // inferred from mutant phenotype /// 0004518 // nuclease activity // traceable author statement /// 0004518 // nucle…	chr11:94150170-94227040 (-) // 92.53 // q21
11757741_s_at	0.0473962	-0.0473957	-1.06791	-0.0947919	1.06791	down	SOX4	6659	0001501 // skeletal system development // inferred from sequence or structural similarity /// 0001501 // skeletal system development // inferred from electronic annotation /// 0001841 // neural tube formation // inferred from sequence or structural similarity /// 0001841 // neural tube formation // inferred from electronic annotation /// 0002328 // pro-B cell differentiation // inferred from sequ…	0005634 // nucleus // inferred from direct assay /// 0005634 // nucleus // inferred from electronic annotation /// 0005730 // nucleolus // inferred from direct assay /// 0005737 // cytoplasm // inferred from direct assay /// 0005739 // mitochondrion // inferred from direct assay	0000976 // transcription regulatory region sequence-specific DNA binding // inferred from sequence or structural similarity /// 0000976 // transcription regulatory region sequence-specific DNA binding // inferred from electronic annotation /// 0001046 // core promoter sequence-specific DNA binding // inferred from direct assay /// 0001046 // core promoter sequence-specific DNA binding // inferred…	chr6:21596716-21597392 (+) // 94.1 // p22.3
11727551_a_at	-0.236684	0.236684	1.38835	0.473368	1.38835	up	ADAMTS10	81794	0006508 // proteolysis // inferred from electronic annotation /// 0007229 // integrin-mediated signaling pathway // inferred from electronic annotation	0001527 // microfibril // inferred from direct assay /// 0005576 // extracellular region // inferred from electronic annotation /// 0005578 // proteinaceous extracellular matrix // inferred from electronic annotation /// 0031012 // extracellular matrix // inferred from direct assay /// 0031012 // extracellular matrix // inferred from electronic annotation	0004222 // metalloendopeptidase activity // inferred from electronic annotation /// 0005515 // protein binding // inferred from physical interaction /// 0008233 // peptidase activity // inferred from electronic annotation /// 0008237 // metallopeptidase activity // inferred from electronic annotation /// 0008270 // zinc ion binding // inferred from electronic annotation /// 0016787 // hydrolase a…	chr19:8645125-8673133 (-) // 97.65 // p13.2
11721902_a_at	0.238749	-0.238749	-1.39233	-0.477497	1.39233	down	SERPINI1	5274	0007417 // central nervous system development // traceable author statement /// 0007422 // peripheral nervous system development // traceable author statement /// 0010466 // negative regulation of peptidase activity // inferred from electronic annotation /// 0010951 // negative regulation of endopeptidase activity // not recorded /// 0030155 // regulation of cell adhesion // inferred from electro…	0005576 // extracellular region // inferred from electronic annotation	0004867 // serine-type endopeptidase inhibitor activity // not recorded /// 0004867 // serine-type endopeptidase inhibitor activity // inferred from electronic annotation /// 0004867 // serine-type endopeptidase inhibitor activity // traceable author statement /// 0030414 // peptidase inhibitor activity // inferred from electronic annotation	chr3:167453510-167543560 (+) // 99.62 // q26.1
11763571_at	-0.0885897	0.0885897	1.13067	0.177179	1.13067	up	SLC1A7	6512	0006810 // transport // inferred from electronic annotation /// 0006811 // ion transport // traceable author statement /// 0006835 // dicarboxylic acid transport // traceable author statement /// 0006835 // dicarboxylic acid transport // inferred from electronic annotation /// 0015813 // L-glutamate transport // traceable author statement /// 0055085 // transmembrane transport // traceable author…	0005886 // plasma membrane // traceable author statement /// 0016020 // membrane // inferred from electronic annotation /// 0016021 // integral to membrane // non-traceable author statement /// 0016021 // integral to membrane // inferred from electronic annotation	0005313 // L-glutamate transmembrane transporter activity // traceable author statement /// 0015293 // symporter activity // inferred from electronic annotation /// 0017153 // sodium:dicarboxylate symporter activity // inferred from electronic annotation	chr1:53580247-53584281 (+) // 83.97 // p32.3
11746180_a_at	-0.100097	0.100097	1.14885	0.200193	1.14885	up	CD55	1604	0006958 // complement activation, classical pathway // inferred from electronic annotation /// 0007204 // elevation of cytosolic calcium ion concentration // inferred from direct assay /// 0030449 // regulation of complement activation // traceable author statement /// 0045087 // innate immune response // traceable author statement /// 0045087 // innate immune response // inferred from electronic…	0005576 // extracellular region // traceable author statement /// 0005625 // soluble fraction // traceable author statement /// 0005886 // plasma membrane // traceable author statement /// 0005886 // plasma membrane // inferred from electronic annotation /// 0005887 // integral to plasma membrane // traceable author statement /// 0009986 // cell surface // inferred from direct assay /// 0016020 /…	0004872 // receptor activity // inferred from electronic annotation	chr1:207495077-207533846 (+) // 96.56 // q32.2
11759203_a_at	0.0190568	-0.0190568	-1.02677	-0.0381136	1.02677	down	ZNF223 /// ZNF284	342909 /// 7766	0006351 // transcription, DNA-dependent // inferred from electronic annotation /// 0006355 // regulation of transcription, DNA-dependent // inferred from electronic annotation	0005622 // intracellular // inferred from electronic annotation /// 0005634 // nucleus // inferred from electronic annotation /// 0005634 // nucleus // non-traceable author statement	0003676 // nucleic acid binding // inferred from electronic annotation /// 0003677 // DNA binding // inferred from electronic annotation /// 0003677 // DNA binding // non-traceable author statement /// 0008270 // zinc ion binding // inferred from electronic annotation /// 0046872 // metal ion binding // inferred from electronic annotation	chr19:44556163-44572142 (+) // 79.7 // q13.31
11736723_a_at	-0.0762663	0.0762663	1.11152	0.152533	1.11152	up	PDLIM7	9260	0001503 // ossification // inferred from electronic annotation /// 0006898 // receptor-mediated endocytosis // traceable author statement /// 0007275 // multicellular organismal development // inferred from electronic annotation /// 0030036 // actin cytoskeleton organization // inferred from electronic annotation /// 0030154 // cell differentiation // inferred from electronic annotation /// 00456…	0001725 // stress fiber // inferred from electronic annotation /// 0001726 // ruffle // inferred from electronic annotation /// 0005737 // cytoplasm // inferred from electronic annotation /// 0005856 // cytoskeleton // inferred from electronic annotation /// 0005925 // focal adhesion // inferred from direct assay /// 0015629 // actin cytoskeleton // inferred from direct assay /// 0030054 // cell …	0005515 // protein binding // inferred from physical interaction /// 0008270 // zinc ion binding // inferred from electronic annotation /// 0046872 // metal ion binding // inferred from electronic annotation	chr5:176910394-176924602 (-) // 100.0 // q35.3
11736662_a_at	0.0391541	-0.0391541	-1.05578	-0.0783081	1.05578	down	CADPS2	93664	0006810 // transport // inferred from electronic annotation /// 0006887 // exocytosis // inferred from electronic annotation /// 0015031 // protein transport // inferred from electronic annotation /// 0016082 // synaptic vesicle priming // inferred from electronic annotation /// 0045921 // positive regulation of exocytosis // inferred from electronic annotation	0016020 // membrane // inferred from electronic annotation /// 0016023 // cytoplasmic membrane-bounded vesicle // inferred from electronic annotation /// 0030054 // cell junction // inferred from electronic annotation /// 0030659 // cytoplasmic vesicle membrane // inferred from electronic annotation /// 0031410 // cytoplasmic vesicle // inferred from electronic annotation /// 0042734 // presynapt…	0005543 // phospholipid binding // inferred from electronic annotation /// 0008289 // lipid binding // inferred from electronic annotation /// 0046872 // metal ion binding // inferred from electronic annotation	chr7:121958478-122526554 (-) // 97.07 // q31.32
11725019_a_at	0.00642872	-0.00642872	-1.00895	-0.0128574	1.00895	down	MST1R	4486	0006468 // protein phosphorylation // inferred from electronic annotation /// 0006928 // cellular component movement // traceable author statement /// 0006952 // defense response // traceable author statement /// 0007165 // signal transduction // traceable author statement /// 0007169 // transmembrane receptor protein tyrosine kinase signaling pathway // inferred from electronic annotation /// 00…	0001725 // stress fiber // inferred from electronic annotation /// 0005886 // plasma membrane // inferred from electronic annotation /// 0005887 // integral to plasma membrane // traceable author statement /// 0016020 // membrane // inferred from electronic annotation /// 0016021 // integral to membrane // inferred from electronic annotation	0000166 // nucleotide binding // inferred from electronic annotation /// 0004672 // protein kinase activity // inferred from electronic annotation /// 0004713 // protein tyrosine kinase activity // inferred from electronic annotation /// 0004714 // transmembrane receptor protein tyrosine kinase activity // inferred from electronic annotation /// 0004872 // receptor activity // inferred from elect…	chr3:49924437-49941306 (-) // 96.95 // p21.31
11727803_at	-0.0525775	0.052578	1.07561	0.105155	1.07561	up	GJA9-MYCBP /// MYCBP	100527950 /// 26292	0006351 // transcription, DNA-dependent // inferred from electronic annotation /// 0006355 // regulation of transcription, DNA-dependent // inferred from direct assay /// 0006355 // regulation of transcription, DNA-dependent // inferred from electronic annotation /// 0007283 // spermatogenesis // inferred from expression pattern	0005634 // nucleus // inferred from direct assay /// 0005634 // nucleus // inferred from electronic annotation /// 0005737 // cytoplasm // inferred from direct assay /// 0005737 // cytoplasm // inferred from electronic annotation /// 0005739 // mitochondrion // inferred from electronic annotation /// 0005813 // centrosome // inferred from direct assay	0003713 // transcription coactivator activity // inferred from direct assay /// 0005515 // protein binding // inferred from physical interaction	chr1:39328636-39340206 (-) // 88.2 // p34.3
11740937_x_at	0.16333	-0.16333	-1.25411	-0.32666	1.25411	down	LIAS	11019	0001843 // neural tube closure // inferred from electronic annotation /// 0006954 // inflammatory response // inferred from sequence or structural similarity /// 0006954 // inflammatory response // inferred from electronic annotation /// 0006979 // response to oxidative stress // inferred from sequence or structural similarity /// 0006979 // response to oxidative stress // inferred from electroni…	0005739 // mitochondrion // inferred from sequence or structural similarity /// 0005739 // mitochondrion // inferred from electronic annotation	0003824 // catalytic activity // inferred from electronic annotation /// 0016740 // transferase activity // inferred from electronic annotation /// 0016992 // lipoate synthase activity // inferred from sequence or structural similarity /// 0016992 // lipoate synthase activity // inferred from electronic annotation /// 0046872 // metal ion binding // inferred from electronic annotation /// 0051536…	chr4:39460664-39479269 (+) // 80.02 // p14
11740966_a_at	-0.179452	0.179452	1.28245	0.358904	1.28245	up	LOC391322	391322				chr22:24373110-24376211 (+) // 93.91 // q11.23
11732166_a_at	-0.0528789	0.0528789	1.07606	0.105758	1.07606	up	LMF1	64788	0006888 // ER to Golgi vesicle-mediated transport // inferred from electronic annotation /// 0009306 // protein secretion // inferred from electronic annotation /// 0033578 // protein glycosylation in Golgi // inferred from electronic annotation /// 0034382 // chylomicron remnant clearance // inferred from electronic annotation /// 0051006 // positive regulation of lipoprotein lipase activity // …	0005783 // endoplasmic reticulum // inferred from electronic annotation /// 0005789 // endoplasmic reticulum membrane // inferred from electronic annotation /// 0005794 // Golgi apparatus // inferred from electronic annotation /// 0016020 // membrane // inferred from electronic annotation /// 0016021 // integral to membrane // inferred from electronic annotation		chr16:903629-1020999 (-) // 98.26 // p13.3
11715128_s_at	0.00870705	-0.00870657	-1.01214	-0.0174136	1.01214	down	PCDHGB5	56101	0007155 // cell adhesion // inferred from electronic annotation /// 0007156 // homophilic cell adhesion // inferred from electronic annotation	0005886 // plasma membrane // inferred from electronic annotation /// 0016020 // membrane // inferred from electronic annotation /// 0016021 // integral to membrane // inferred from electronic annotation	0005509 // calcium ion binding // inferred from electronic annotation	chr5:140777694-140780151 (+) // 100.0 // q31.3
11728841_a_at	-0.0625033	0.0625033	1.09051	0.125007	1.09051	up	PLEKHA5	54477			0005515 // protein binding // inferred from physical interaction /// 0005543 // phospholipid binding // inferred from electronic annotation /// 0005545 // 1-phosphatidylinositol binding // non-traceable author statement	chr12:19282628-19529334 (+) // 96.91 // p12.3
11724615_at	-0.0317173	0.0317173	1.04495	0.0634346	1.04495	up	LIMK1	3984	0006468 // protein phosphorylation // inferred from direct assay /// 0006468 // protein phosphorylation // non-traceable author statement /// 0006468 // protein phosphorylation // inferred from electronic annotation /// 0006468 // protein phosphorylation // traceable author statement /// 0007165 // signal transduction // traceable author statement /// 0007266 // Rho protein signal transduction //…	0005634 // nucleus // inferred from direct assay /// 0005634 // nucleus // inferred from electronic annotation /// 0005730 // nucleolus // inferred from direct assay /// 0005737 // cytoplasm // inferred from direct assay /// 0005737 // cytoplasm // inferred from electronic annotation /// 0005829 // cytosol // traceable author statement /// 0043005 // neuron projection // inferred from sequence or…	0000166 // nucleotide binding // inferred from electronic annotation /// 0004672 // protein kinase activity // non-traceable author statement /// 0004672 // protein kinase activity // inferred from electronic annotation /// 0004674 // protein serine/threonine kinase activity // traceable author statement /// 0004674 // protein serine/threonine kinase activity // inferred from electronic annotatio…	chr7:73498155-73536855 (+) // 95.33 // q11.23
11723313_s_at	0.0656948	-0.0656948	-1.09535	-0.13139	1.09535	down	PXMP2	5827		0005737 // cytoplasm // inferred from direct assay /// 0005739 // mitochondrion // inferred from electronic annotation /// 0005777 // peroxisome // inferred from electronic annotation /// 0005778 // peroxisomal membrane // inferred from direct assay /// 0005778 // peroxisomal membrane // inferred from electronic annotation /// 0016020 // membrane // inferred from electronic annotation /// 0016021…	0005515 // protein binding // inferred from physical interaction	chr12:133264125-133281571 (+) // 97.22 // q24.33
11726087_at	-0.0877016	0.0877018	1.12928	0.175403	1.12928	up	HSPB3	8988	0006950 // response to stress // inferred from electronic annotation /// 0006986 // response to unfolded protein // traceable author statement /// 0008219 // cell death // inferred from electronic annotation	0005634 // nucleus // inferred from direct assay /// 0005634 // nucleus // inferred from electronic annotation /// 0005737 // cytoplasm // inferred from direct assay /// 0005737 // cytoplasm // inferred from electronic annotation		chr5:53751430-53752207 (+) // 98.73 // q11.2
11723247_a_at	-0.190641	0.190641	1.3025	0.381283	1.3025	up	SFRP1	6422	0001649 // osteoblast differentiation // inferred from expression pattern /// 0001649 // osteoblast differentiation // inferred from electronic annotation /// 0001657 // ureteric bud development // inferred from electronic annotation /// 0001756 // somitogenesis // inferred from electronic annotation /// 0001843 // neural tube closure // inferred from electronic annotation /// 0001944 // vasculat…	0005576 // extracellular region // inferred from electronic annotation /// 0005578 // proteinaceous extracellular matrix // inferred from direct assay /// 0005615 // extracellular space // inferred from direct assay /// 0005622 // intracellular // inferred from direct assay /// 0005829 // cytosol // inferred from direct assay /// 0005886 // plasma membrane // not recorded /// 0005886 // plasma me…	0004197 // cysteine-type endopeptidase activity // inferred from mutant phenotype /// 0005109 // frizzled binding // inferred from physical interaction /// 0008144 // drug binding // inferred from direct assay /// 0008201 // heparin binding // inferred from direct assay /// 0017147 // Wnt-protein binding // inferred from physical interaction /// 0017147 // Wnt-protein binding // inferred from ele…	chr8:41119477-41166990 (-) // 97.65 // p11.21
11745412_s_at	-0.143074	0.143074	1.21938	0.286148	1.21938	up	LOC441178	441178				chr6:168083767-168084736 (-) // 99.38 // q27
11757242_x_at	0.0166335	-0.0166335	-1.02333	-0.033267	1.02333	down	LOC339240	339240		0005576 // extracellular region // inferred from electronic annotation		chr17:18325494-18328647 (+) // 80.24 // p11.2 /// chr17:20422385-20425541 (-) // 82.71 // p11.2 /// chr17:16750714-16753867 (-) // 73.04 // p11.2
11744034_a_at	-0.0142746	0.0142741	1.01999	0.0285487	1.01999	up	VASP	7408	0001843 // neural tube closure // inferred from electronic annotation /// 0007411 // axon guidance // traceable author statement /// 0007411 // axon guidance // inferred from electronic annotation /// 0008154 // actin polymerization or depolymerization // inferred from electronic annotation /// 0030036 // actin cytoskeleton organization // inferred from electronic annotation /// 0034329 // cell j…	0005737 // cytoplasm // inferred from direct assay /// 0005737 // cytoplasm // inferred from electronic annotation /// 0005829 // cytosol // traceable author statement /// 0005856 // cytoskeleton // inferred from electronic annotation /// 0005886 // plasma membrane // inferred from direct assay /// 0005886 // plasma membrane // inferred from electronic annotation /// 0005925 // focal adhesion // …	0003779 // actin binding // inferred from electronic annotation /// 0005515 // protein binding // inferred from physical interaction /// 0005522 // profilin binding // inferred from physical interaction /// 0017124 // SH3 domain binding // inferred from electronic annotation	chr19:46010694-46030241 (+) // 89.99 // q13.32
11741280_s_at	-0.0334258	0.0334258	1.04743	0.0668516	1.04743	up	CASC1	55259		0005881 // cytoplasmic microtubule // inferred from electronic annotation	0008017 // microtubule binding // inferred from electronic annotation /// 0048487 // beta-tubulin binding // inferred from electronic annotation	chr12:25261223-25348094 (-) // 99.41 // p12.1
11757313_s_at	-0.0858092	0.0858092	1.12632	0.171618	1.12632	up	VAT1	10493	0010637 // negative regulation of mitochondrial fusion // inferred from mutant phenotype /// 0016049 // cell growth // non-traceable author statement /// 0055114 // oxidation-reduction process // inferred from electronic annotation	0005634 // nucleus // non-traceable author statement /// 0005737 // cytoplasm // inferred from electronic annotation /// 0005739 // mitochondrion // inferred from electronic annotation /// 0005741 // mitochondrial outer membrane // inferred from electronic annotation /// 0016020 // membrane // inferred from electronic annotation /// 0016021 // integral to membrane // traceable author statement	0000166 // nucleotide binding // inferred from electronic annotation /// 0003677 // DNA binding // non-traceable author statement /// 0008270 // zinc ion binding // inferred from electronic annotation /// 0016491 // oxidoreductase activity // inferred from electronic annotation	chr17:41166623-41167974 (-) // 92.54 // q21.31
11727264_at	-0.121279	0.121279	1.18309	0.242558	1.18309	up	LRRC8E	80131		0016020 // membrane // inferred from electronic annotation /// 0016021 // integral to membrane // inferred from electronic annotation		chr19:7953389-7966901 (+) // 85.61 // p13.2
11751320_a_at	-0.109349	0.109349	1.16368	0.218698	1.16368	up	POLL	27343	0006260 // DNA replication // non-traceable author statement /// 0006260 // DNA replication // inferred from electronic annotation /// 0006281 // DNA repair // inferred from electronic annotation /// 0006289 // nucleotide-excision repair // inferred from direct assay /// 0006974 // response to DNA damage stimulus // inferred from electronic annotation /// 0016446 // somatic hypermutation of immun…	0005622 // intracellular // inferred from electronic annotation /// 0005634 // nucleus // non-traceable author statement /// 0005634 // nucleus // inferred from electronic annotation	0003677 // DNA binding // inferred from electronic annotation /// 0003677 // DNA binding // non-traceable author statement /// 0003824 // catalytic activity // inferred from electronic annotation /// 0003887 // DNA-directed DNA polymerase activity // inferred from electronic annotation /// 0003887 // DNA-directed DNA polymerase activity // non-traceable author statement /// 0016740 // transferase…	chr10:103338990-103348006 (-) // 99.86 // q24.32
11722091_a_at	-0.0551543	0.0551543	1.07946	0.110309	1.07946	up	PRR5	55615	0007049 // cell cycle // inferred from electronic annotation /// 0007165 // signal transduction // inferred from electronic annotation /// 0007264 // small GTPase mediated signal transduction // traceable author statement /// 0030036 // actin cytoskeleton organization // inferred from direct assay /// 0030335 // positive regulation of cell migration // inferred from direct assay /// 0032321 // po…	0005622 // intracellular // inferred from electronic annotation /// 0005829 // cytosol // traceable author statement	0005096 // GTPase activator activity // inferred from electronic annotation /// 0005096 // GTPase activator activity // inferred from direct assay /// 0005100 // Rho GTPase activator activity // inferred from direct assay /// 0005515 // protein binding // inferred from physical interaction	chr22:45072687-45133561 (+) // 97.79 // q13.31
11718474_a_at	0.167394	-0.167394	-1.26119	-0.334787	1.26119	down	IDH1	3417	0006097 // glyoxylate cycle // inferred from electronic annotation /// 0006099 // tricarboxylic acid cycle // inferred from electronic annotation /// 0006102 // isocitrate metabolic process // inferred from direct assay /// 0006102 // isocitrate metabolic process // inferred from electronic annotation /// 0006103 // 2-oxoglutarate metabolic process // inferred from direct assay /// 0006103 // 2-o…	0005737 // cytoplasm // inferred from direct assay /// 0005737 // cytoplasm // inferred from electronic annotation /// 0005739 // mitochondrion // inferred from electronic annotation /// 0005777 // peroxisome // inferred from direct assay /// 0005777 // peroxisome // inferred from electronic annotation /// 0005782 // peroxisomal matrix // traceable author statement /// 0005829 // cytosol // infer…	0000287 // magnesium ion binding // inferred from direct assay /// 0000287 // magnesium ion binding // inferred from electronic annotation /// 0004450 // isocitrate dehydrogenase (NADP+) activity // not recorded /// 0004450 // isocitrate dehydrogenase (NADP+) activity // inferred from direct assay /// 0004450 // isocitrate dehydrogenase (NADP+) activity // inferred from electronic annotation /// …	chr2:209100952-209120522 (-) // 92.68 // q34
11745815_x_at	0.0502992	-0.0502996	-1.07222	-0.100599	1.07222	down	C16orf5	29965	0006915 // apoptotic process // inferred from genetic interaction /// 0006917 // induction of apoptosis // inferred from direct assay /// 0033209 // tumor necrosis factor-mediated signaling pathway // inferred from genetic interaction /// 0042771 // DNA damage response, signal transduction by p53 class mediator resulting in induction of apoptosis // inferred from mutant phenotype	0005634 // nucleus // inferred from direct assay /// 0005634 // nucleus // non-traceable author statement		chr16:4560706-4565107 (-) // 95.22 // p13.3
11717432_a_at	-0.0579057	0.0579052	1.08358	0.115811	1.08358	up	ECHDC1	55862	0008152 // metabolic process // inferred from electronic annotation	0005737 // cytoplasm // inferred from electronic annotation /// 0005829 // cytosol // inferred from sequence or structural similarity /// 0005829 // cytosol // inferred from electronic annotation	0003824 // catalytic activity // inferred from electronic annotation /// 0004492 // methylmalonyl-CoA decarboxylase activity // inferred from electronic annotation /// 0016829 // lyase activity // inferred from electronic annotation /// 0016831 // carboxy-lyase activity // inferred from sequence or structural similarity /// 0016831 // carboxy-lyase activity // inferred from electronic annotation …	chr6:127609856-127665037 (-) // 98.5 // q22.33
11720731_a_at	0.0151939	-0.0151939	-1.02129	-0.0303879	1.02129	down	SUMF1	285362	0055114 // oxidation-reduction process // inferred from electronic annotation	0005783 // endoplasmic reticulum // inferred from electronic annotation /// 0005788 // endoplasmic reticulum lumen // inferred from electronic annotation	0016491 // oxidoreductase activity // inferred from electronic annotation /// 0042803 // protein homodimerization activity // inferred from electronic annotation /// 0046872 // metal ion binding // inferred from electronic annotation	chr3:4402829-4508954 (-) // 90.13 // p26.1
11741989_a_at	0.0949922	-0.0949922	-1.14075	-0.189984	1.14075	down	P2RX2	22953	0006810 // transport // inferred from electronic annotation /// 0006811 // ion transport // inferred from electronic annotation /// 0006812 // cation transport // not recorded /// 0010524 // positive regulation of calcium ion transport into cytosol // non-traceable author statement /// 0035590 // purinergic nucleotide receptor signaling pathway // not recorded /// 0035590 // purinergic nucleotide…	0016020 // membrane // not recorded /// 0016020 // membrane // inferred from electronic annotation /// 0016021 // integral to membrane // inferred from electronic annotation	0001614 // purinergic nucleotide receptor activity // not recorded /// 0001614 // purinergic nucleotide receptor activity // non-traceable author statement /// 0004872 // receptor activity // inferred from electronic annotation /// 0004931 // extracellular ATP-gated cation channel activity // not recorded /// 0004931 // extracellular ATP-gated cation channel activity // non-traceable author state…	chr12:133195402-133198972 (+) // 96.32 // q24.33
11741321_a_at	0.0171084	-0.0171084	-1.024	-0.0342169	1.024	down	CREM	1390	0006006 // glucose metabolic process // inferred from electronic annotation /// 0006351 // transcription, DNA-dependent // inferred from electronic annotation /// 0006355 // regulation of transcription, DNA-dependent // inferred from direct assay /// 0006355 // regulation of transcription, DNA-dependent // non-traceable author statement /// 0006355 // regulation of transcription, DNA-dependent //…	0005634 // nucleus // inferred from electronic annotation /// 0005634 // nucleus // non-traceable author statement /// 0005634 // nucleus // traceable author statement /// 0005667 // transcription factor complex // inferred from electronic annotation	0003677 // DNA binding // non-traceable author statement /// 0003677 // DNA binding // inferred from electronic annotation /// 0003700 // sequence-specific DNA binding transcription factor activity // inferred from electronic annotation /// 0005515 // protein binding // inferred from physical interaction /// 0008140 // cAMP response element binding protein binding // non-traceable author statemen…	chr10:35484829-35501885 (+) // 99.52 // p11.21
11753889_a_at	-0.0735135	0.073513	1.10728	0.147027	1.10728	up	STAT6	6778	0000122 // negative regulation of transcription from RNA polymerase II promoter // inferred from electronic annotation /// 0002296 // T-helper 1 cell lineage commitment // inferred from electronic annotation /// 0002829 // negative regulation of type 2 immune response // inferred from electronic annotation /// 0006351 // transcription, DNA-dependent // inferred from electronic annotation /// 0006…	0000790 // nuclear chromatin // inferred from electronic annotation /// 0005634 // nucleus // inferred from direct assay /// 0005634 // nucleus // inferred from electronic annotation /// 0005730 // nucleolus // inferred from direct assay /// 0005737 // cytoplasm // inferred from direct assay /// 0005737 // cytoplasm // inferred from electronic annotation /// 0005829 // cytosol // traceable author…	0003677 // DNA binding // inferred from electronic annotation /// 0003700 // sequence-specific DNA binding transcription factor activity // inferred from electronic annotation /// 0003700 // sequence-specific DNA binding transcription factor activity // traceable author statement /// 0004871 // signal transducer activity // inferred from electronic annotation /// 0005509 // calcium ion binding //…	chr12:57501945-57502061 (-) // 99.15 // q13.3
11735141_at	0.106108	-0.106108	-1.15847	-0.212216	1.15847	down	SORCS3	22986	0007218 // neuropeptide signaling pathway // non-traceable author statement /// 0048011 // nerve growth factor receptor signaling pathway // traceable author statement	0005886 // plasma membrane // traceable author statement /// 0016020 // membrane // non-traceable author statement /// 0016020 // membrane // inferred from electronic annotation /// 0016021 // integral to membrane // inferred from electronic annotation	0004872 // receptor activity // inferred from electronic annotation /// 0008188 // neuropeptide receptor activity // non-traceable author statement	chr10:106400858-107024999 (+) // 99.71 // q25.1
11756090_s_at	-0.0083704	0.0083704	1.01167	0.0167408	1.01167	up	ZHX1	11244	0000122 // negative regulation of transcription from RNA polymerase II promoter // inferred from direct assay /// 0006351 // transcription, DNA-dependent // inferred from electronic annotation /// 0006355 // regulation of transcription, DNA-dependent // inferred from electronic annotation /// 0030154 // cell differentiation // inferred from electronic annotation /// 0045892 // negative regulation…	0005622 // intracellular // inferred from electronic annotation /// 0005634 // nucleus // inferred from direct assay /// 0005634 // nucleus // inferred from electronic annotation	0003677 // DNA binding // inferred from electronic annotation /// 0003700 // sequence-specific DNA binding transcription factor activity // inferred from direct assay /// 0003700 // sequence-specific DNA binding transcription factor activity // inferred from electronic annotation /// 0003714 // transcription corepressor activity // inferred from direct assay /// 0005515 // protein binding // infe…	chr14:63763014-63764134 (+) // 49.18 // q23.2
11740919_a_at	0.069319	-0.069319	-1.10087	-0.138638	1.10087	down	RSPO1	284654	0002090 // regulation of receptor internalization // inferred from direct assay /// 0016055 // Wnt receptor signaling pathway // inferred from electronic annotation /// 0030177 // positive regulation of Wnt receptor signaling pathway // inferred from direct assay /// 0050896 // response to stimulus // inferred from electronic annotation /// 0060070 // canonical Wnt receptor signaling pathway // i…	0005576 // extracellular region // inferred from electronic annotation /// 0005615 // extracellular space // inferred from electronic annotation /// 0005634 // nucleus // inferred from electronic annotation	0005102 // receptor binding // inferred from electronic annotation /// 0005515 // protein binding // inferred from physical interaction /// 0008201 // heparin binding // inferred from electronic annotation	chr1:38076950-38100491 (-) // 84.99 // p34.3
11730501_a_at	0.0614448	-0.0614448	-1.08891	-0.12289	1.08891	down	CACNA2D3	55799	0006810 // transport // inferred from electronic annotation /// 0006811 // ion transport // inferred from electronic annotation /// 0006816 // calcium ion transport // inferred from electronic annotation /// 0034765 // regulation of ion transmembrane transport // inferred from electronic annotation /// 0051925 // regulation of calcium ion transport via voltage-gated calcium channel activity // in…	0016020 // membrane // inferred from electronic annotation /// 0016021 // integral to membrane // inferred from electronic annotation	0005216 // ion channel activity // inferred from electronic annotation /// 0005244 // voltage-gated ion channel activity // inferred from electronic annotation /// 0005245 // voltage-gated calcium channel activity // inferred from electronic annotation /// 0005262 // calcium channel activity // inferred from electronic annotation /// 0046872 // metal ion binding // inferred from electronic annota…	chr3:54156650-55108582 (+) // 97.56 // p21.1
11743248_at	0.125372	-0.125372	-1.18982	-0.250745	1.18982	down	ONECUT3	390874	0006351 // transcription, DNA-dependent // inferred from electronic annotation /// 0006355 // regulation of transcription, DNA-dependent // inferred from electronic annotation /// 0006357 // regulation of transcription from RNA polymerase II promoter // inferred from electronic annotation /// 0031018 // endocrine pancreas development // traceable author statement	0005634 // nucleus // inferred from electronic annotation /// 0005667 // transcription factor complex // inferred from electronic annotation	0003677 // DNA binding // inferred from electronic annotation /// 0003700 // sequence-specific DNA binding transcription factor activity // inferred from electronic annotation /// 0043565 // sequence-specific DNA binding // inferred from electronic annotation	chr19:1753661-1775602 (+) // 63.32 // p13.3
11761537_at	0.20862	-0.20862	-1.33537	-0.41724	1.33537	down	TM2D3	80213		0016020 // membrane // inferred from electronic annotation /// 0016021 // integral to membrane // inferred from electronic annotation		chr15:102173275-102192579 (-) // 53.12 // q26.3
11745685_a_at	0.214556	-0.214556	-1.34641	-0.429113	1.34641	down	SCLT1	132320	0045162 // clustering of voltage-gated sodium channels // inferred from electronic annotation	0005737 // cytoplasm // inferred from direct assay /// 0005737 // cytoplasm // inferred from electronic annotation /// 0005813 // centrosome // inferred from direct assay /// 0005886 // plasma membrane // inferred from electronic annotation /// 0045111 // intermediate filament cytoskeleton // inferred from direct assay	0017080 // sodium channel regulator activity // inferred from electronic annotation	chr4:129805500-130014567 (-) // 99.93 // q28.2
11764008_at	0.0644074	-0.0644074	-1.09339	-0.128815	1.09339	down						chr9:121450030-121468238 (-) // 43.26 // q33.1
11731749_at	-0.0138617	0.0138614	1.0194	0.0277231	1.0194	up	SNX32	254122	0006810 // transport // inferred from electronic annotation /// 0007154 // cell communication // inferred from electronic annotation /// 0015031 // protein transport // inferred from electronic annotation		0035091 // phosphatidylinositol binding // inferred from electronic annotation	chr11:65601409-65621172 (+) // 95.15 // q13.1
11719543_a_at	-0.0583277	0.0583277	1.08422	0.116655	1.08422	up	C3orf18	51161		0016020 // membrane // inferred from electronic annotation /// 0016021 // integral to membrane // inferred from electronic annotation		chr3:50595461-50605199 (-) // 95.98 // p21.31
11756854_a_at	0.018888	-0.018888	-1.02653	-0.037776	1.02653	down	EHBP1	23301		0005737 // cytoplasm // inferred from direct assay /// 0005737 // cytoplasm // inferred from electronic annotation /// 0016020 // membrane // inferred from electronic annotation		chr2:63192096-63272798 (+) // 100.0 // p15
11749575_at	-0.0873184	0.0873184	1.12868	0.174637	1.12868	up	LOC100287329	100287329				chr6:31527069-31540480 (-) // 96.53 // p21.33
11717457_a_at	-0.10494	0.10494	1.15659	0.209881	1.15659	up	NLGN2	57555	0007155 // cell adhesion // inferred from electronic annotation /// 0007158 // neuron cell-cell adhesion // inferred from sequence or structural similarity /// 0007416 // synapse assembly // not recorded /// 0007416 // synapse assembly // inferred from sequence or structural similarity /// 0007416 // synapse assembly // non-traceable author statement /// 0016337 // cell-cell adhesion // non-trace…	0005886 // plasma membrane // inferred from electronic annotation /// 0005887 // integral to plasma membrane // not recorded /// 0005887 // integral to plasma membrane // inferred from sequence or structural similarity /// 0009986 // cell surface // not recorded /// 0009986 // cell surface // inferred from sequence or structural similarity /// 0016020 // membrane // non-traceable author statement…	0004091 // carboxylesterase activity // not recorded /// 0004872 // receptor activity // not recorded /// 0042043 // neurexin family protein binding // not recorded /// 0042043 // neurexin family protein binding // inferred from sequence or structural similarity /// 0042043 // neurexin family protein binding // non-traceable author statement /// 0050839 // cell adhesion molecule binding // inferr…	chr17:7311501-7323179 (+) // 94.41 // p13.1
11735338_at	-0.0132723	0.0132723	1.01857	0.0265446	1.01857	up	LINC00482	284185				chr17:79276623-79283053 (-) // 77.12 // q25.3
11716992_at	-0.0361772	0.0361772	1.05143	0.0723543	1.05143	up	CIC	23152	0006351 // transcription, DNA-dependent // inferred from electronic annotation /// 0006355 // regulation of transcription, DNA-dependent // inferred from electronic annotation	0005634 // nucleus // inferred from electronic annotation	0003677 // DNA binding // inferred from electronic annotation /// 0005515 // protein binding // inferred from physical interaction	chr19:42788816-42799948 (+) // 95.51 // q13.2
11738637_a_at	-0.0150967	0.0150967	1.02115	0.0301933	1.02115	up	CTBP1	1487	0000122 // negative regulation of transcription from RNA polymerase II promoter // inferred from direct assay /// 0000122 // negative regulation of transcription from RNA polymerase II promoter // inferred from mutant phenotype /// 0000122 // negative regulation of transcription from RNA polymerase II promoter // inferred from electronic annotation /// 0006351 // transcription, DNA-dependent // i…	0005634 // nucleus // inferred from direct assay /// 0005634 // nucleus // inferred from sequence or structural similarity /// 0005634 // nucleus // inferred from electronic annotation /// 0005667 // transcription factor complex // inferred from electronic annotation /// 0005730 // nucleolus // inferred from direct assay /// 0005737 // cytoplasm // inferred from electronic annotation /// 0017053 …	0000166 // nucleotide binding // inferred from electronic annotation /// 0001106 // RNA polymerase II transcription corepressor activity // inferred from direct assay /// 0003700 // sequence-specific DNA binding transcription factor activity // inferred from electronic annotation /// 0005515 // protein binding // inferred from physical interaction /// 0008022 // protein C-terminus binding // trac…	chr4:1205232-1242914 (-) // 90.98 // p16.3
11720930_s_at	-0.0761209	0.0761209	1.11129	0.152242	1.11129	up	DLST	1743	0006091 // generation of precursor metabolites and energy // traceable author statement /// 0006099 // tricarboxylic acid cycle // traceable author statement /// 0006099 // tricarboxylic acid cycle // inferred from electronic annotation /// 0006103 // 2-oxoglutarate metabolic process // inferred from electronic annotation /// 0006554 // lysine catabolic process // traceable author statement /// 0…	0005634 // nucleus // inferred from direct assay /// 0005737 // cytoplasm // inferred from direct assay /// 0005739 // mitochondrion // inferred from direct assay /// 0005739 // mitochondrion // inferred from electronic annotation /// 0005759 // mitochondrial matrix // traceable author statement /// 0005792 // microsome // inferred from electronic annotation /// 0005886 // plasma membrane // infe…	0004149 // dihydrolipoyllysine-residue succinyltransferase activity // inferred from electronic annotation /// 0016740 // transferase activity // inferred from electronic annotation /// 0016746 // transferase activity, transferring acyl groups // inferred from electronic annotation /// 0031072 // heat shock protein binding // inferred from electronic annotation /// 0051087 // chaperone binding //…	chr14:75348595-75370443 (+) // 98.64 // q24.3
11723309_at	-0.108436	0.108436	1.16221	0.216872	1.16221	up	TNFRSF10D	8793	0006915 // apoptotic process // inferred from electronic annotation /// 0006916 // anti-apoptosis // traceable author statement /// 0007165 // signal transduction // traceable author statement	0016020 // membrane // inferred from electronic annotation /// 0016021 // integral to membrane // inferred from electronic annotation	0004872 // receptor activity // inferred from electronic annotation /// 0004888 // transmembrane signaling receptor activity // traceable author statement /// 0045569 // TRAIL binding // inferred from electronic annotation	chr8:22993100-23021543 (-) // 89.17 // p21.3
11733872_x_at	0.0285854	-0.0285854	-1.04042	-0.0571709	1.04042	down	LOC100652805 /// LOC100653302 /// PGK1	100652805 /// 100653302 /// 5230	0005975 // carbohydrate metabolic process // traceable author statement /// 0006006 // glucose metabolic process // traceable author statement /// 0006094 // gluconeogenesis // traceable author statement /// 0006096 // glycolysis // inferred from electronic annotation /// 0006096 // glycolysis // traceable author statement /// 0016310 // phosphorylation // inferred from sequence or structural sim…	0005737 // cytoplasm // inferred from electronic annotation /// 0005829 // cytosol // traceable author statement	0000166 // nucleotide binding // inferred from electronic annotation /// 0004618 // phosphoglycerate kinase activity // not recorded /// 0004618 // phosphoglycerate kinase activity // inferred from sequence or structural similarity /// 0004618 // phosphoglycerate kinase activity // inferred from electronic annotation /// 0004618 // phosphoglycerate kinase activity // traceable author statement //…	chrX:77359665-77382323 (+) // 82.0 // q21.1
11752991_at	-0.0871303	0.0871303	1.12839	0.174261	1.12839	up	HSP90B3P	343477	0006457 // protein folding // inferred from electronic annotation /// 0006950 // response to stress // inferred from electronic annotation		0005524 // ATP binding // inferred from electronic annotation /// 0051082 // unfolded protein binding // inferred from electronic annotation	chr1:92100567-92109335 (+) // 94.13 // p22.1
11758326_s_at	0.0219097	-0.0219097	-1.03084	-0.0438194	1.03084	down	THEM4	117145	0007173 // epidermal growth factor receptor signaling pathway // traceable author statement /// 0008286 // insulin receptor signaling pathway // traceable author statement /// 0008543 // fibroblast growth factor receptor signaling pathway // traceable author statement /// 0048011 // nerve growth factor receptor signaling pathway // traceable author statement /// 0048015 // phosphatidylinositol-me…	0005737 // cytoplasm // inferred from electronic annotation /// 0005739 // mitochondrion // inferred from electronic annotation /// 0005829 // cytosol // traceable author statement /// 0005886 // plasma membrane // traceable author statement /// 0005886 // plasma membrane // inferred from electronic annotation /// 0016020 // membrane // inferred from electronic annotation /// 0032587 // ruffle me…		chr1:151849535-151881964 (-) // 98.49 // q21.3 /// chr15:55734929-55735594 (-) // 94.86 // q21.3
11724297_a_at	-0.0416241	0.0416241	1.0594	0.0832481	1.0594	up	BMP7	655	0001501 // skeletal system development // traceable author statement /// 0001503 // ossification // inferred from electronic annotation /// 0001654 // eye development // inferred from electronic annotation /// 0001656 // metanephros development // inferred from expression pattern /// 0001657 // ureteric bud development // inferred from sequence or structural similarity /// 0001657 // ureteric bud…	0005576 // extracellular region // inferred from electronic annotation /// 0005615 // extracellular space // inferred from direct assay /// 0005615 // extracellular space // inferred from electronic annotation	0005125 // cytokine activity // inferred from electronic annotation /// 0005515 // protein binding // inferred from physical interaction /// 0008083 // growth factor activity // inferred from electronic annotation	chr20:55743808-55841708 (-) // 89.56 // q13.31
11721212_a_at	0.0814908	-0.0814908	-1.1196	-0.162982	1.1196	down	THBS4	7060	0001938 // positive regulation of endothelial cell proliferation // inferred from direct assay /// 0007155 // cell adhesion // inferred from electronic annotation /// 0007399 // nervous system development // inferred from electronic annotation /// 0016525 // negative regulation of angiogenesis // inferred from expression pattern /// 0048812 // neuron projection morphogenesis // inferred from elec…	0005576 // extracellular region // traceable author statement /// 0005576 // extracellular region // inferred from electronic annotation /// 0005578 // proteinaceous extracellular matrix // inferred from electronic annotation /// 0005604 // basement membrane // inferred from direct assay /// 0005615 // extracellular space // inferred from direct assay /// 0031594 // neuromuscular junction // infe…	0001968 // fibronectin binding // inferred from electronic annotation /// 0005178 // integrin binding // inferred from direct assay /// 0005509 // calcium ion binding // inferred from direct assay /// 0005509 // calcium ion binding // inferred from electronic annotation /// 0005518 // collagen binding // inferred from electronic annotation /// 0008083 // growth factor activity // inferred from el…	chr5:79330990-79379110 (+) // 98.43 // q14.1
11735472_a_at	0.130531	-0.130531	-1.19836	-0.261061	1.19836	down	CCDC169 /// CCDC169-SOHLH2 /// SOHLH2	100526761 /// 54937 /// 728591	0006351 // transcription, DNA-dependent // inferred from electronic annotation /// 0006355 // regulation of transcription, DNA-dependent // inferred from electronic annotation /// 0007275 // multicellular organismal development // inferred from electronic annotation /// 0007283 // spermatogenesis // inferred from electronic annotation /// 0030154 // cell differentiation // inferred from electroni…	0005634 // nucleus // inferred from electronic annotation	0003677 // DNA binding // inferred from electronic annotation	chr13:36804911-36871992 (-) // 100.0 // q13.3
11715686_s_at	-0.127096	0.127096	1.19267	0.254192	1.19267	up	ARPC5	10092	0006928 // cellular component movement // traceable author statement /// 0030036 // actin cytoskeleton organization // traceable author statement /// 0030833 // regulation of actin filament polymerization // inferred from electronic annotation	0005737 // cytoplasm // inferred from electronic annotation /// 0005737 // cytoplasm // traceable author statement /// 0005856 // cytoskeleton // inferred from electronic annotation /// 0005885 // Arp2/3 protein complex // traceable author statement /// 0015629 // actin cytoskeleton // traceable author statement /// 0042995 // cell projection // inferred from electronic annotation	0003779 // actin binding // inferred from electronic annotation /// 0005200 // structural constituent of cytoskeleton // traceable author statement /// 0005515 // protein binding // inferred from physical interaction	chr1:183595327-183605076 (-) // 91.38 // q25.3
11753825_x_at	-0.0939326	0.0939322	1.13908	0.187865	1.13908	up	FKBP1A	2280	0000413 // protein peptidyl-prolyl isomerization // inferred from direct assay /// 0000413 // protein peptidyl-prolyl isomerization // traceable author statement /// 0000413 // protein peptidyl-prolyl isomerization // inferred from electronic annotation /// 0003007 // heart morphogenesis // inferred from sequence or structural similarity /// 0006457 // protein folding // inferred from electronic …	0005737 // cytoplasm // inferred from electronic annotation /// 0005829 // cytosol // inferred from direct assay /// 0014802 // terminal cisterna // inferred from sequence or structural similarity /// 0030424 // axon // not recorded /// 0033017 // sarcoplasmic reticulum membrane // not recorded	0003755 // peptidyl-prolyl cis-trans isomerase activity // inferred from direct assay /// 0003755 // peptidyl-prolyl cis-trans isomerase activity // inferred from electronic annotation /// 0003755 // peptidyl-prolyl cis-trans isomerase activity // traceable author statement /// 0004871 // signal transducer activity // inferred from mutant phenotype /// 0005024 // transforming growth factor beta-a…	chr6:63921461-63921788 (+) // 99.28 // q12 /// chr20:1352755-1373642 (-) // 100.0 // p13
11728376_s_at	-0.240651	0.240651	1.396	0.481302	1.396	up	NMU	10874	0001696 // gastric acid secretion // inferred from electronic annotation /// 0006940 // regulation of smooth muscle contraction // traceable author statement /// 0006940 // regulation of smooth muscle contraction // inferred from electronic annotation /// 0006950 // response to stress // inferred from electronic annotation /// 0007165 // signal transduction // traceable author statement /// 00071…	0005576 // extracellular region // traceable author statement /// 0005576 // extracellular region // inferred from electronic annotation /// 0043195 // terminal button // inferred from electronic annotation	0005102 // receptor binding // traceable author statement /// 0042922 // neuromedin U receptor binding // inferred from electronic annotation	chr4:56461397-56502465 (-) // 93.62 // q12
11717341_at	0	0	-1	0	1	down	PTGFRN	5738	0034389 // lipid particle organization // inferred from electronic annotation	0005783 // endoplasmic reticulum // inferred from electronic annotation /// 0005789 // endoplasmic reticulum membrane // inferred from electronic annotation /// 0005794 // Golgi apparatus // inferred from electronic annotation /// 0016020 // membrane // inferred from electronic annotation /// 0016021 // integral to membrane // inferred from electronic annotation	0005515 // protein binding // inferred from physical interaction	chr1:117452572-117532975 (+) // 96.47 // p13.1
11759881_at	-0.0924702	0.0924702	1.13677	0.18494	1.13677	up	PPIA	5478	0000413 // protein peptidyl-prolyl isomerization // inferred from direct assay /// 0000413 // protein peptidyl-prolyl isomerization // inferred from electronic annotation /// 0002576 // platelet degranulation // traceable author statement /// 0006278 // RNA-dependent DNA replication // traceable author statement /// 0006457 // protein folding // inferred from electronic annotation /// 0006457 // …	0005576 // extracellular region // traceable author statement /// 0005634 // nucleus // inferred from direct assay /// 0005829 // cytosol // inferred from direct assay /// 0005829 // cytosol // traceable author statement	0003755 // peptidyl-prolyl cis-trans isomerase activity // inferred from direct assay /// 0003755 // peptidyl-prolyl cis-trans isomerase activity // inferred from electronic annotation /// 0005515 // protein binding // inferred from physical interaction /// 0016853 // isomerase activity // inferred from electronic annotation /// 0042277 // peptide binding // inferred from electronic annotation //…	chr11:3913430-3914122 (-) // 75.66 // p15.4
11735609_a_at	-0.0413504	0.0413504	1.059	0.0827007	1.059	up	FER1L5	90342		0016020 // membrane // inferred from electronic annotation /// 0016021 // integral to membrane // inferred from electronic annotation		chr2:97308573-97370624 (+) // 99.98 // q11.2
11734876_a_at	0.0369658	-0.0369656	-1.05258	-0.0739315	1.05258	down	TMEM30B	161291	0070863 // positive regulation of protein exit from endoplasmic reticulum // inferred from direct assay	0016020 // membrane // inferred from electronic annotation /// 0016021 // integral to membrane // inferred from electronic annotation	0005515 // protein binding // inferred from physical interaction	chr14:61744087-61748558 (-) // 92.78 // q23.1
11721891_at	0.169357	-0.169357	-1.26463	-0.338715	1.26463	down	LPHN1	22859	0007165 // signal transduction // inferred from electronic annotation /// 0007166 // cell surface receptor signaling pathway // inferred from electronic annotation /// 0007186 // G-protein coupled receptor signaling pathway // traceable author statement /// 0007186 // G-protein coupled receptor signaling pathway // inferred from electronic annotation /// 0007218 // neuropeptide signaling pathway …	0005886 // plasma membrane // inferred from electronic annotation /// 0014069 // postsynaptic density // inferred from electronic annotation /// 0016020 // membrane // inferred from electronic annotation /// 0016021 // integral to membrane // inferred from electronic annotation /// 0016021 // integral to membrane // traceable author statement	0004871 // signal transducer activity // inferred from electronic annotation /// 0004872 // receptor activity // inferred from electronic annotation /// 0004888 // transmembrane signaling receptor activity // inferred from electronic annotation /// 0004930 // G-protein coupled receptor activity // inferred from electronic annotation /// 0004930 // G-protein coupled receptor activity // traceable …	chr19:14258548-14316999 (-) // 97.96 // p13.12
11731997_at	-0.0799198	0.0799198	1.11716	0.15984	1.11716	up	TRIM58	25893		0005622 // intracellular // inferred from electronic annotation	0008270 // zinc ion binding // inferred from electronic annotation /// 0046872 // metal ion binding // inferred from electronic annotation	chr1:248020471-248042611 (+) // 61.22 // q44
11725741_x_at	-0.0900106	0.0900106	1.1329	0.180021	1.1329	up	SMPDL3B	27293	0006685 // sphingomyelin catabolic process // inferred from electronic annotation /// 0008152 // metabolic process // inferred from electronic annotation	0005576 // extracellular region // inferred from electronic annotation /// 0005615 // extracellular space // inferred from electronic annotation	0004767 // sphingomyelin phosphodiesterase activity // inferred from electronic annotation /// 0016787 // hydrolase activity // inferred from electronic annotation /// 0016798 // hydrolase activity, acting on glycosyl bonds // inferred from electronic annotation	chr1:28261466-28285663 (+) // 94.1 // p35.3
11751294_a_at	0	0	-1	0	1	down	ST6GALNAC5	81849	0006486 // protein glycosylation // inferred from electronic annotation /// 0006688 // glycosphingolipid biosynthetic process // inferred from sequence or structural similarity /// 0006688 // glycosphingolipid biosynthetic process // inferred from electronic annotation /// 0009312 // oligosaccharide biosynthetic process // inferred from sequence or structural similarity /// 0009312 // oligosaccha…	0000139 // Golgi membrane // inferred from electronic annotation /// 0005794 // Golgi apparatus // inferred from electronic annotation /// 0016020 // membrane // inferred from electronic annotation /// 0016021 // integral to membrane // inferred from electronic annotation /// 0030173 // integral to Golgi membrane // inferred from electronic annotation	0001665 // alpha-N-acetylgalactosaminide alpha-2,6-sialyltransferase activity // inferred from sequence or structural similarity /// 0001665 // alpha-N-acetylgalactosaminide alpha-2,6-sialyltransferase activity // inferred from electronic annotation /// 0008373 // sialyltransferase activity // inferred from sequence or structural similarity /// 0008373 // sialyltransferase activity // inferred fr…	chr1:77333170-77529522 (+) // 81.07 // p31.1
11717275_s_at	-0.0286121	0.0286121	1.04046	0.0572243	1.04046	up	COL5A1	1289	0001568 // blood vessel development // inferred from electronic annotation /// 0003007 // heart morphogenesis // inferred from electronic annotation /// 0007155 // cell adhesion // inferred from mutant phenotype /// 0007411 // axon guidance // traceable author statement /// 0016477 // cell migration // inferred from mutant phenotype /// 0030199 // collagen fibril organization // inferred from mut…	0005576 // extracellular region // traceable author statement /// 0005576 // extracellular region // inferred from electronic annotation /// 0005578 // proteinaceous extracellular matrix // inferred from electronic annotation /// 0005581 // collagen // inferred from electronic annotation /// 0005588 // collagen type V // inferred from mutant phenotype /// 0005588 // collagen type V // traceable a…	0005178 // integrin binding // non-traceable author statement /// 0005201 // extracellular matrix structural constituent // inferred from electronic annotation /// 0008201 // heparin binding // inferred from direct assay /// 0008201 // heparin binding // inferred from electronic annotation /// 0043394 // proteoglycan binding // inferred from physical interaction /// 0048407 // platelet-derived gr…	chr9:137533565-137736689 (+) // 98.38 // q34.3
11739947_a_at	0.0337267	-0.0337269	-1.04787	-0.0674536	1.04787	down	PFKFB2	5208	0005975 // carbohydrate metabolic process // traceable author statement /// 0006000 // fructose metabolic process // traceable author statement /// 0006000 // fructose metabolic process // inferred from electronic annotation /// 0006003 // fructose 2,6-bisphosphate metabolic process // inferred from electronic annotation /// 0006006 // glucose metabolic process // traceable author statement /// 0…	0005737 // cytoplasm // inferred from electronic annotation /// 0005829 // cytosol // traceable author statement	0000166 // nucleotide binding // inferred from electronic annotation /// 0003824 // catalytic activity // inferred from electronic annotation /// 0003873 // 6-phosphofructo-2-kinase activity // inferred from direct assay /// 0003873 // 6-phosphofructo-2-kinase activity // inferred from electronic annotation /// 0003873 // 6-phosphofructo-2-kinase activity // traceable author statement /// 0004331…	chr1:207226592-207254369 (+) // 99.21 // q32.2
11752129_a_at	-0.0425067	0.0425067	1.0607	0.0850134	1.0607	up	BIVM-ERCC5 /// ERCC5	100533467 /// 2073	0000718 // nucleotide-excision repair, DNA damage removal // traceable author statement /// 0006281 // DNA repair // traceable author statement /// 0006281 // DNA repair // inferred from electronic annotation /// 0006283 // transcription-coupled nucleotide-excision repair // inferred from mutant phenotype /// 0006283 // transcription-coupled nucleotide-excision repair // traceable author statemen…	0005634 // nucleus // inferred from direct assay /// 0005634 // nucleus // inferred from electronic annotation /// 0005654 // nucleoplasm // traceable author statement /// 0005675 // holo TFIIH complex // inferred from direct assay /// 0016591 // DNA-directed RNA polymerase II, holoenzyme // inferred from direct assay	0000405 // bubble DNA binding // inferred from direct assay /// 0003677 // DNA binding // inferred from electronic annotation /// 0003690 // double-stranded DNA binding // inferred from direct assay /// 0003697 // single-stranded DNA binding // inferred from direct assay /// 0003697 // single-stranded DNA binding // inferred from electronic annotation /// 0003824 // catalytic activity // inferred…	chr13:103498396-103524611 (+) // 97.64 // q33.1
11717129_s_at	0.0391636	-0.0391636	-1.05579	-0.0783272	1.05579	down	SAR1A	56681	0006184 // GTP catabolic process // non-traceable author statement /// 0006810 // transport // inferred from electronic annotation /// 0006886 // intracellular protein transport // inferred from electronic annotation /// 0006888 // ER to Golgi vesicle-mediated transport // non-traceable author statement /// 0015031 // protein transport // inferred from electronic annotation /// 0016192 // vesicle…	0005622 // intracellular // inferred from electronic annotation /// 0005737 // cytoplasm // non-traceable author statement /// 0005783 // endoplasmic reticulum // inferred from direct assay /// 0005783 // endoplasmic reticulum // inferred from electronic annotation /// 0005794 // Golgi apparatus // inferred from electronic annotation /// 0016529 // sarcoplasmic reticulum // inferred from electron…	0000166 // nucleotide binding // inferred from electronic annotation /// 0003924 // GTPase activity // non-traceable author statement /// 0005525 // GTP binding // inferred from electronic annotation	chr10:71909325-71930279 (-) // 84.52 // q22.1
11740589_s_at	-0.0673065	0.0673065	1.0978	0.134613	1.0978	up	RYK	6259	0006468 // protein phosphorylation // inferred from direct assay /// 0006468 // protein phosphorylation // inferred from electronic annotation /// 0007165 // signal transduction // traceable author statement /// 0007409 // axonogenesis // inferred from electronic annotation /// 0007411 // axon guidance // inferred from sequence or structural similarity /// 0007411 // axon guidance // inferred fro…	0005624 // membrane fraction // inferred from electronic annotation /// 0005634 // nucleus // inferred from sequence or structural similarity /// 0005634 // nucleus // inferred from electronic annotation /// 0005737 // cytoplasm // inferred from sequence or structural similarity /// 0005737 // cytoplasm // inferred from electronic annotation /// 0005886 // plasma membrane // inferred from electro…	0000166 // nucleotide binding // inferred from electronic annotation /// 0004672 // protein kinase activity // inferred from electronic annotation /// 0004713 // protein tyrosine kinase activity // inferred from direct assay /// 0004713 // protein tyrosine kinase activity // inferred from electronic annotation /// 0004714 // transmembrane receptor protein tyrosine kinase activity // inferred from…	chr3:133875977-133969586 (-) // 92.38 // q22.2
11715690_x_at	0.00921059	-0.00921059	-1.01285	-0.0184212	1.01285	down	CD164	8763	0006955 // immune response // traceable author statement /// 0007155 // cell adhesion // inferred from direct assay /// 0007155 // cell adhesion // inferred from electronic annotation /// 0007155 // cell adhesion // traceable author statement /// 0007157 // heterophilic cell-cell adhesion // inferred from direct assay /// 0007162 // negative regulation of cell adhesion // non-traceable author sta…	0005576 // extracellular region // inferred from electronic annotation /// 0005764 // lysosome // inferred from direct assay /// 0005764 // lysosome // inferred from electronic annotation /// 0005765 // lysosomal membrane // inferred from electronic annotation /// 0005768 // endosome // inferred from direct assay /// 0005768 // endosome // inferred from electronic annotation /// 0005886 // plasma…	0005515 // protein binding // inferred from physical interaction	chr6:109687716-109703978 (-) // 97.26 // q21
11741555_s_at	-0.00258732	0.0025878	1.00359	0.00517511	1.00359	up	LIPA /// LOC100507575	100507575 /// 3988	0000902 // cell morphogenesis // inferred from electronic annotation /// 0001816 // cytokine production // inferred from electronic annotation /// 0006629 // lipid metabolic process // inferred from electronic annotation /// 0006631 // fatty acid metabolic process // inferred from electronic annotation /// 0006954 // inflammatory response // inferred from electronic annotation /// 0008283 // cell…	0005764 // lysosome // inferred from electronic annotation /// 0005764 // lysosome // traceable author statement	0004771 // sterol esterase activity // inferred from direct assay /// 0004771 // sterol esterase activity // inferred from electronic annotation /// 0016298 // lipase activity // inferred from direct assay /// 0016298 // lipase activity // inferred from electronic annotation /// 0016787 // hydrolase activity // inferred from electronic annotation /// 0016788 // hydrolase activity, acting on ester…	chr10:90973327-91011660 (-) // 97.23 // q23.31
11758631_s_at	0.307191	-0.30719	-1.5309	-0.614381	1.5309	down	FOXO4	4303	0000080 // G1 phase of mitotic cell cycle // inferred from direct assay /// 0006351 // transcription, DNA-dependent // inferred from electronic annotation /// 0006355 // regulation of transcription, DNA-dependent // inferred from direct assay /// 0006355 // regulation of transcription, DNA-dependent // inferred from electronic annotation /// 0006366 // transcription from RNA polymerase II promote…	0005634 // nucleus // inferred from direct assay /// 0005634 // nucleus // inferred from electronic annotation /// 0005654 // nucleoplasm // traceable author statement /// 0005667 // transcription factor complex // not recorded /// 0005737 // cytoplasm // inferred from direct assay /// 0005737 // cytoplasm // inferred from electronic annotation /// 0005829 // cytosol // inferred from direct assay…	0003677 // DNA binding // inferred from direct assay /// 0003677 // DNA binding // inferred from electronic annotation /// 0003690 // double-stranded DNA binding // not recorded /// 0003700 // sequence-specific DNA binding transcription factor activity // inferred from direct assay /// 0003700 // sequence-specific DNA binding transcription factor activity // inferred from electronic annotation //…	chrX:70321367-70323384 (+) // 98.84 // q13.1
11744193_x_at	0.0340538	-0.0340538	-1.04834	-0.0681076	1.04834	down	SUMO1	7341	0006281 // DNA repair // traceable author statement /// 0006355 // regulation of transcription, DNA-dependent // inferred from electronic annotation /// 0016925 // protein sumoylation // inferred from direct assay /// 0016925 // protein sumoylation // inferred from electronic annotation /// 0019221 // cytokine-mediated signaling pathway // traceable author statement /// 0031334 // positive regula…	0005634 // nucleus // inferred from direct assay /// 0005634 // nucleus // inferred from electronic annotation /// 0005634 // nucleus // traceable author statement /// 0005643 // nuclear pore // traceable author statement /// 0005654 // nucleoplasm // traceable author statement /// 0005737 // cytoplasm // inferred from electronic annotation /// 0016020 // membrane // inferred from electronic anno…	0005515 // protein binding // inferred from physical interaction /// 0008134 // transcription factor binding // inferred from electronic annotation /// 0019789 // SUMO ligase activity // inferred from electronic annotation /// 0031625 // ubiquitin protein ligase binding // inferred from physical interaction	chr2:203070904-203103322 (-) // 91.91 // q33.1
11761061_at	0.170523	-0.170523	-1.26667	-0.341046	1.26667	down	UQCRC1	7384	0006119 // oxidative phosphorylation // traceable author statement /// 0006122 // mitochondrial electron transport, ubiquinol to cytochrome c // inferred from electronic annotation /// 0006508 // proteolysis // inferred from electronic annotation /// 0009060 // aerobic respiration // traceable author statement /// 0014823 // response to activity // inferred from electronic annotation /// 0022900 …	0005739 // mitochondrion // inferred from direct assay /// 0005739 // mitochondrion // inferred from electronic annotation /// 0005743 // mitochondrial inner membrane // traceable author statement /// 0005743 // mitochondrial inner membrane // inferred from electronic annotation /// 0005746 // mitochondrial respiratory chain // traceable author statement /// 0005750 // mitochondrial respiratory c…	0003824 // catalytic activity // inferred from electronic annotation /// 0004222 // metalloendopeptidase activity // inferred from electronic annotation /// 0008121 // ubiquinol-cytochrome-c reductase activity // traceable author statement /// 0008270 // zinc ion binding // inferred from electronic annotation /// 0032403 // protein complex binding // inferred from electronic annotation /// 004687…	chr3:48641403-48647069 (-) // 99.38 // p21.31
11751683_a_at	0.0485806	-0.0485806	-1.06967	-0.0971613	1.06967	down	RAB11A	8766	0000910 // cytokinesis // inferred from mutant phenotype /// 0006184 // GTP catabolic process // inferred from direct assay /// 0006810 // transport // inferred from electronic annotation /// 0006833 // water transport // traceable author statement /// 0007049 // cell cycle // inferred from electronic annotation /// 0007264 // small GTPase mediated signal transduction // inferred from electronic …	0005739 // mitochondrion // inferred from electronic annotation /// 0005768 // endosome // inferred from electronic annotation /// 0005802 // trans-Golgi network // inferred from direct assay /// 0005886 // plasma membrane // inferred from electronic annotation /// 0016020 // membrane // inferred from electronic annotation /// 0030133 // transport vesicle // inferred from electronic annotation //…	0000166 // nucleotide binding // inferred from electronic annotation /// 0003924 // GTPase activity // inferred from direct assay /// 0005515 // protein binding // inferred from physical interaction /// 0005525 // GTP binding // inferred from electronic annotation /// 0019905 // syntaxin binding // non-traceable author statement	chr15:66161793-66180585 (+) // 99.8 // q22.31
11738815_at	0.138968	-0.138967	-1.21246	-0.277935	1.21246	down	EGFR	1956	0000165 // MAPK cascade // non-traceable author statement /// 0000186 // activation of MAPKK activity // non-traceable author statement /// 0000902 // cell morphogenesis // inferred from electronic annotation /// 0001503 // ossification // non-traceable author statement /// 0001892 // embryonic placenta development // inferred from electronic annotation /// 0001942 // hair follicle development //…	0000139 // Golgi membrane // inferred from electronic annotation /// 0005576 // extracellular region // inferred from electronic annotation /// 0005615 // extracellular space // non-traceable author statement /// 0005622 // intracellular // inferred from electronic annotation /// 0005634 // nucleus // inferred from direct assay /// 0005634 // nucleus // inferred from electronic annotation /// 000…	0000166 // nucleotide binding // inferred from electronic annotation /// 0003690 // double-stranded DNA binding // non-traceable author statement /// 0004672 // protein kinase activity // inferred from electronic annotation /// 0004709 // MAP kinase kinase kinase activity // non-traceable author statement /// 0004713 // protein tyrosine kinase activity // inferred from direct assay /// 0004713 //…	chr7:55086724-55238738 (+) // 96.65 // p11.2
11753382_a_at	-0.167137	0.167137	1.26074	0.334274	1.26074	up	ZC4H2	55906			0046872 // metal ion binding // inferred from electronic annotation	chrX:64137300-64196330 (-) // 100.0 // q11.2
11732621_a_at	-0.0478277	0.0478277	1.06855	0.0956554	1.06855	up	CRB3	92359	0034329 // cell junction assembly // traceable author statement /// 0045216 // cell-cell junction organization // traceable author statement /// 0070830 // tight junction assembly // traceable author statement /// 0072659 // protein localization in plasma membrane // inferred from direct assay	0005886 // plasma membrane // traceable author statement /// 0005886 // plasma membrane // inferred from electronic annotation /// 0005923 // tight junction // inferred from electronic annotation /// 0016020 // membrane // inferred from electronic annotation /// 0016021 // integral to membrane // inferred from electronic annotation /// 0016324 // apical plasma membrane // inferred from electronic…	0017124 // SH3 domain binding // inferred from physical interaction /// 0019904 // protein domain specific binding // inferred from physical interaction	chr19:6464248-6467228 (+) // 96.64 // p13.3
11726910_x_at	0.0750742	-0.0750742	-1.10968	-0.150148	1.10968	down	MRI1	84245	0000096 // sulfur amino acid metabolic process // traceable author statement /// 0006595 // polyamine metabolic process // traceable author statement /// 0008652 // cellular amino acid biosynthetic process // inferred from electronic annotation /// 0009086 // methionine biosynthetic process // inferred from electronic annotation /// 0019509 // L-methionine salvage from methylthioadenosine // not …	0005634 // nucleus // inferred from electronic annotation /// 0005737 // cytoplasm // not recorded /// 0005737 // cytoplasm // inferred from electronic annotation /// 0005829 // cytosol // traceable author statement /// 0042995 // cell projection // inferred from electronic annotation	0016853 // isomerase activity // inferred from electronic annotation /// 0042802 // identical protein binding // inferred from physical interaction /// 0046523 // S-methyl-5-thioribose-1-phosphate isomerase activity // not recorded /// 0046523 // S-methyl-5-thioribose-1-phosphate isomerase activity // inferred from electronic annotation	chr19:13875361-13885095 (+) // 38.97 // p13.2
11729067_a_at	-0.0745077	0.0745077	1.10881	0.149015	1.10881	up	PM20D1	148811	0006508 // proteolysis // inferred from electronic annotation /// 0008152 // metabolic process // inferred from electronic annotation	0005576 // extracellular region // inferred from electronic annotation	0008233 // peptidase activity // inferred from electronic annotation /// 0016787 // hydrolase activity // inferred from electronic annotation /// 0046872 // metal ion binding // inferred from electronic annotation	chr1:205797153-205819270 (-) // 94.85 // q32.1
11735923_x_at	-0.025847	0.025847	1.03648	0.0516939	1.03648	up	AMELY	266	0007275 // multicellular organismal development // inferred from electronic annotation /// 0031214 // biomineral tissue development // inferred from electronic annotation	0005576 // extracellular region // inferred from electronic annotation /// 0005578 // proteinaceous extracellular matrix // inferred from electronic annotation /// 0044420 // extracellular matrix part // inferred by curator	0030345 // structural constituent of tooth enamel // inferred from direct assay	chrY:6733958-6742068 (-) // 100.0 // p11.2
11715838_a_at	-0.0116029	0.0116024	1.01621	0.0232053	1.01621	up	NEU1	4758	0006665 // sphingolipid metabolic process // traceable author statement /// 0006687 // glycosphingolipid metabolic process // traceable author statement /// 0008152 // metabolic process // inferred from electronic annotation /// 0044281 // small molecule metabolic process // traceable author statement	0005764 // lysosome // traceable author statement /// 0005764 // lysosome // inferred from electronic annotation /// 0005765 // lysosomal membrane // inferred from electronic annotation /// 0005886 // plasma membrane // inferred from electronic annotation /// 0016020 // membrane // inferred from electronic annotation /// 0016023 // cytoplasmic membrane-bounded vesicle // inferred from electronic …	0004308 // exo-alpha-sialidase activity // traceable author statement /// 0004308 // exo-alpha-sialidase activity // inferred from electronic annotation /// 0016787 // hydrolase activity // inferred from electronic annotation /// 0016798 // hydrolase activity, acting on glycosyl bonds // inferred from electronic annotation /// 0052794 // exo-alpha-(2->3)-sialidase activity // inferred from electr…	chr6:31826829-31830709 (-) // 98.05 // p21.33
11724977_a_at	0.00951052	-0.00951099	-1.01327	-0.0190215	1.01327	down	ITGB4	3691	0007154 // cell communication // inferred from electronic annotation /// 0007155 // cell adhesion // non-traceable author statement /// 0007155 // cell adhesion // inferred from electronic annotation /// 0007160 // cell-matrix adhesion // inferred from electronic annotation /// 0007229 // integrin-mediated signaling pathway // inferred from electronic annotation /// 0007275 // multicellular organ…	0005604 // basement membrane // inferred from electronic annotation /// 0005886 // plasma membrane // inferred from direct assay /// 0005886 // plasma membrane // traceable author statement /// 0008305 // integrin complex // inferred from electronic annotation /// 0008305 // integrin complex // traceable author statement /// 0009925 // basal plasma membrane // inferred from electronic annotation …	0004872 // receptor activity // inferred from electronic annotation /// 0005102 // receptor binding // inferred from electronic annotation /// 0005515 // protein binding // inferred from physical interaction	chr17:73720775-73753899 (+) // 97.34 // q25.1
11727630_s_at	0.083035	-0.083035	-1.122	-0.16607	1.122	down	APBA2	321	0001701 // in utero embryonic development // inferred from electronic annotation /// 0006810 // transport // inferred from electronic annotation /// 0007399 // nervous system development // traceable author statement /// 0007626 // locomotory behavior // inferred from electronic annotation /// 0015031 // protein transport // inferred from electronic annotation /// 0035264 // multicellular organis…	0005886 // plasma membrane // inferred from electronic annotation	0001540 // beta-amyloid binding // inferred from electronic annotation /// 0005515 // protein binding // inferred from physical interaction	chr15:29131174-29410518 (+) // 97.63 // q13.1
11721492_a_at	-0.102633	0.102633	1.1529	0.205266	1.1529	up	ANKRD7	56311	0008584 // male gonad development // traceable author statement			chr7:117864158-117882761 (+) // 77.6 // q31.31
11745824_x_at	0.112013	-0.112013	-1.16799	-0.224027	1.16799	down	ACAA1	30	0000038 // very long-chain fatty acid metabolic process // inferred from mutant phenotype /// 0006629 // lipid metabolic process // inferred from electronic annotation /// 0006631 // fatty acid metabolic process // inferred from electronic annotation /// 0006635 // fatty acid beta-oxidation // inferred from mutant phenotype /// 0008152 // metabolic process // inferred from electronic annotation /…	0005777 // peroxisome // inferred from direct assay /// 0005777 // peroxisome // inferred from electronic annotation /// 0005782 // peroxisomal matrix // traceable author statement /// 0043231 // intracellular membrane-bounded organelle // inferred from direct assay	0003824 // catalytic activity // inferred from electronic annotation /// 0003988 // acetyl-CoA C-acyltransferase activity // inferred from electronic annotation /// 0005515 // protein binding // inferred from physical interaction /// 0016401 // palmitoyl-CoA oxidase activity // inferred from mutant phenotype /// 0016740 // transferase activity // inferred from electronic annotation /// 0016746 //…	chr3:38164206-38178628 (-) // 96.78 // p22.2
11753172_a_at	0.0522432	-0.0522432	-1.07511	-0.104486	1.07511	down	GRB7	2886	0007165 // signal transduction // inferred from electronic annotation /// 0007173 // epidermal growth factor receptor signaling pathway // traceable author statement /// 0007596 // blood coagulation // traceable author statement /// 0017148 // negative regulation of translation // inferred from sequence or structural similarity /// 0017148 // negative regulation of translation // inferred from el…	0005737 // cytoplasm // inferred from electronic annotation /// 0005829 // cytosol // inferred from direct assay /// 0005829 // cytosol // traceable author statement /// 0005886 // plasma membrane // inferred from electronic annotation /// 0005925 // focal adhesion // inferred from direct assay /// 0005925 // focal adhesion // inferred from electronic annotation /// 0010494 // cytoplasmic stress …	0003723 // RNA binding // inferred from electronic annotation /// 0004872 // receptor activity // inferred from electronic annotation /// 0005070 // SH3/SH2 adaptor activity // traceable author statement /// 0005515 // protein binding // inferred from physical interaction /// 0005543 // phospholipid binding // inferred from electronic annotation /// 0008289 // lipid binding // inferred from elect…	chr17:37894558-37900857 (+) // 99.74 // q12
11760649_a_at	-0.0382926	0.0382926	1.05452	0.0765853	1.05452	up	MKNK1	8569	0006417 // regulation of translation // inferred from electronic annotation /// 0006468 // protein phosphorylation // inferred from direct assay /// 0006468 // protein phosphorylation // inferred from electronic annotation /// 0007243 // intracellular protein kinase cascade // inferred from direct assay /// 0008543 // fibroblast growth factor receptor signaling pathway // traceable author stateme…	0005634 // nucleus // inferred from electronic annotation /// 0005737 // cytoplasm // inferred from electronic annotation /// 0005829 // cytosol // traceable author statement	0000166 // nucleotide binding // inferred from electronic annotation /// 0004672 // protein kinase activity // inferred from electronic annotation /// 0004674 // protein serine/threonine kinase activity // inferred from direct assay /// 0004674 // protein serine/threonine kinase activity // inferred from electronic annotation /// 0005515 // protein binding // inferred from physical interaction //…	chr1:47023089-47082515 (-) // 99.93 // p33
11738270_a_at	0.0237093	-0.0237093	-1.03341	-0.0474186	1.03341	down	SERP2	387923	0006810 // transport // inferred from electronic annotation /// 0015031 // protein transport // inferred from electronic annotation	0005783 // endoplasmic reticulum // inferred from electronic annotation /// 0005789 // endoplasmic reticulum membrane // inferred from electronic annotation /// 0016020 // membrane // inferred from electronic annotation /// 0016021 // integral to membrane // inferred from electronic annotation		chr13:44947886-44971849 (+) // 91.7 // q14.11
11735541_at	-0.145925	0.145925	1.22421	0.29185	1.22421	up	CCDC122	160857				chr13:44410490-44454599 (-) // 80.6 // q14.11
11745604_x_at	0.0394239	-0.0394239	-1.05617	-0.0788479	1.05617	down	NFKBIB	4793	0002224 // toll-like receptor signaling pathway // traceable author statement /// 0002755 // MyD88-dependent toll-like receptor signaling pathway // traceable author statement /// 0002756 // MyD88-independent toll-like receptor signaling pathway // traceable author statement /// 0006351 // transcription, DNA-dependent // traceable author statement /// 0007165 // signal transduction // traceable a…	0005634 // nucleus // inferred from electronic annotation /// 0005737 // cytoplasm // inferred from electronic annotation /// 0005829 // cytosol // traceable author statement /// 0005829 // cytosol // inferred from electronic annotation	0003713 // transcription coactivator activity // traceable author statement /// 0004871 // signal transducer activity // traceable author statement /// 0005515 // protein binding // inferred from physical interaction	chr19:39390672-39399458 (+) // 96.25 // q13.2
11754940_s_at	-0.0887528	0.0887528	1.13093	0.177506	1.13093	up	TSN	7247	0006310 // DNA recombination // traceable author statement /// 0090305 // nucleic acid phosphodiester bond hydrolysis // inferred from electronic annotation	0005634 // nucleus // inferred from electronic annotation /// 0005634 // nucleus // traceable author statement /// 0005737 // cytoplasm // inferred from electronic annotation	0003677 // DNA binding // traceable author statement /// 0003677 // DNA binding // inferred from electronic annotation /// 0003723 // RNA binding // inferred from electronic annotation /// 0003729 // mRNA binding // inferred from electronic annotation /// 0004518 // nuclease activity // inferred from electronic annotation /// 0004519 // endonuclease activity // inferred from electronic annotation…	chr2:122523605-122524869 (+) // 82.15 // q14.3
11734199_a_at	0	0	-1	0	1	down	ZNF844	284391	0006351 // transcription, DNA-dependent // inferred from electronic annotation /// 0006355 // regulation of transcription, DNA-dependent // inferred from electronic annotation	0005622 // intracellular // inferred from electronic annotation /// 0005634 // nucleus // inferred from electronic annotation	0003676 // nucleic acid binding // inferred from electronic annotation /// 0003677 // DNA binding // inferred from electronic annotation /// 0008270 // zinc ion binding // inferred from electronic annotation /// 0046872 // metal ion binding // inferred from electronic annotation	chr19:12175527-12191178 (+) // 67.75 // p13.2
11721375_a_at	0.0369658	-0.0369658	-1.05258	-0.0739317	1.05258	down	BCL2	596	0000082 // G1/S transition of mitotic cell cycle // inferred from electronic annotation /// 0000209 // protein polyubiquitination // inferred from direct assay /// 0000902 // cell morphogenesis // inferred from electronic annotation /// 0001101 // response to acid // inferred from electronic annotation /// 0001503 // ossification // inferred from electronic annotation /// 0001541 // ovarian folli…	0005622 // intracellular // inferred from electronic annotation /// 0005624 // membrane fraction // inferred from electronic annotation /// 0005634 // nucleus // inferred from direct assay /// 0005634 // nucleus // inferred from electronic annotation /// 0005737 // cytoplasm // inferred from direct assay /// 0005737 // cytoplasm // inferred from electronic annotation /// 0005739 // mitochondrion …	0002020 // protease binding // inferred from direct assay /// 0005515 // protein binding // inferred from physical interaction /// 0008134 // transcription factor binding // inferred from electronic annotation /// 0015267 // channel activity // inferred from direct assay /// 0019903 // protein phosphatase binding // inferred from electronic annotation /// 0031625 // ubiquitin protein ligase bindi…	chr18:60790581-60987019 (-) // 96.73 // q21.33
11715890_x_at	-0.00499248	0.00499248	1.00694	0.00998497	1.00694	up	ATP5I	521	0006200 // ATP catabolic process // inferred from direct assay /// 0006754 // ATP biosynthetic process // inferred from electronic annotation /// 0006810 // transport // inferred from electronic annotation /// 0006811 // ion transport // inferred from electronic annotation /// 0015986 // ATP synthesis coupled proton transport // inferred from electronic annotation /// 0015992 // proton transport …	0000276 // mitochondrial proton-transporting ATP synthase complex, coupling factor F(o) // inferred from electronic annotation /// 0005739 // mitochondrion // inferred by curator /// 0005739 // mitochondrion // inferred from direct assay /// 0005739 // mitochondrion // inferred from electronic annotation /// 0005743 // mitochondrial inner membrane // traceable author statement /// 0005743 // mito…	0015078 // hydrogen ion transmembrane transporter activity // inferred from electronic annotation /// 0016887 // ATPase activity // inferred from direct assay /// 0022857 // transmembrane transporter activity // inferred by curator	chr4:666224-668127 (-) // 69.88 // p16.3
11741639_a_at	-0.0212035	0.0212035	1.02983	0.042407	1.02983	up	DIO2	1734	0001514 // selenocysteine incorporation // non-traceable author statement /// 0006590 // thyroid hormone generation // traceable author statement /// 0006590 // thyroid hormone generation // inferred from electronic annotation /// 0009409 // response to cold // inferred from electronic annotation /// 0032496 // response to lipopolysaccharide // inferred from electronic annotation /// 0034641 // c…	0005886 // plasma membrane // traceable author statement /// 0016020 // membrane // inferred by curator /// 0016020 // membrane // inferred from electronic annotation /// 0016021 // integral to membrane // inferred from electronic annotation	0004800 // thyroxine 5'-deiodinase activity // inferred from direct assay /// 0004800 // thyroxine 5'-deiodinase activity // traceable author statement /// 0004800 // thyroxine 5'-deiodinase activity // inferred from electronic annotation /// 0008430 // selenium binding // inferred by curator /// 0008430 // selenium binding // traceable author statement /// 0016491 // oxidoreductase activity // i…	chr14:80663869-80677843 (-) // 97.08 // q31.1
11737705_s_at	-0.0864735	0.0864735	1.12736	0.172947	1.12736	up	LOC441956	441956				chr21:15051592-15053459 (-) // 94.97 // q11.2
11745173_a_at	-0.0845489	0.0845485	1.12435	0.169097	1.12435	up	ATF6	22926	0006351 // transcription, DNA-dependent // inferred from electronic annotation /// 0006355 // regulation of transcription, DNA-dependent // inferred from electronic annotation /// 0006357 // regulation of transcription from RNA polymerase II promoter // traceable author statement /// 0006457 // protein folding // traceable author statement /// 0006950 // response to stress // traceable author sta…	0000139 // Golgi membrane // traceable author statement /// 0005634 // nucleus // traceable author statement /// 0005634 // nucleus // inferred from electronic annotation /// 0005635 // nuclear envelope // traceable author statement /// 0005654 // nucleoplasm // traceable author statement /// 0005783 // endoplasmic reticulum // inferred from electronic annotation /// 0005789 // endoplasmic reticu…	0003677 // DNA binding // inferred from electronic annotation /// 0003700 // sequence-specific DNA binding transcription factor activity // inferred from electronic annotation /// 0003700 // sequence-specific DNA binding transcription factor activity // traceable author statement /// 0003713 // transcription coactivator activity // traceable author statement /// 0005515 // protein binding // infe…	chr1:161736044-161835750 (+) // 76.51 // q23.3
11743650_s_at	0.188019	-0.188019	-1.29777	-0.376038	1.29777	down	DEK	7913	0006357 // regulation of transcription from RNA polymerase II promoter // traceable author statement /// 0006366 // transcription from RNA polymerase II promoter // traceable author statement /// 0007165 // signal transduction // traceable author statement /// 0016568 // chromatin modification // inferred from electronic annotation /// 0019079 // viral genome replication // traceable author state…	0005634 // nucleus // inferred from direct assay /// 0005634 // nucleus // inferred from electronic annotation /// 0005634 // nucleus // traceable author statement	0003676 // nucleic acid binding // inferred from electronic annotation /// 0003677 // DNA binding // inferred from electronic annotation /// 0042393 // histone binding // inferred from direct assay	chr6:18224247-18265054 (-) // 96.95 // p22.3
11722908_a_at	-0.0283978	0.0283978	1.04015	0.0567956	1.04015	up	KLHL13	90293	0000910 // cytokinesis // inferred from mutant phenotype /// 0007049 // cell cycle // inferred from electronic annotation /// 0007067 // mitosis // inferred from electronic annotation /// 0016567 // protein ubiquitination // inferred from direct assay /// 0016567 // protein ubiquitination // inferred from electronic annotation /// 0051301 // cell division // inferred from electronic annotation	0031463 // Cul3-RING ubiquitin ligase complex // inferred from direct assay	0004842 // ubiquitin-protein ligase activity // inferred from direct assay	chrX:117031775-117107760 (-) // 96.61 // q24
11736322_a_at	0.047678	-0.047678	-1.06833	-0.095356	1.06833	down	BAIAP3	8938	0007186 // G-protein coupled receptor signaling pathway // inferred from physical interaction /// 0007269 // neurotransmitter secretion // traceable author statement		0008022 // protein C-terminus binding // traceable author statement	chr16:1384504-1399440 (+) // 97.1 // p13.3
11727575_a_at	0.10651	-0.10651	-1.15911	-0.21302	1.15911	down	TMEM237	65062	0030030 // cell projection organization // inferred from electronic annotation /// 0030111 // regulation of Wnt receptor signaling pathway // inferred from mutant phenotype /// 0030111 // regulation of Wnt receptor signaling pathway // inferred from electronic annotation /// 0042384 // cilium assembly // inferred from mutant phenotype /// 0042384 // cilium assembly // inferred from electronic ann…	0005929 // cilium // inferred from electronic annotation /// 0016020 // membrane // inferred from electronic annotation /// 0016021 // integral to membrane // inferred from electronic annotation /// 0035869 // ciliary transition zone // inferred from direct assay /// 0035869 // ciliary transition zone // inferred from electronic annotation /// 0042995 // cell projection // inferred from electroni…		chr2:202484910-202507686 (-) // 72.55 // q33.1
11752260_a_at	-0.101425	0.101425	1.15097	0.20285	1.15097	up	TMC3	342125		0016020 // membrane // inferred from electronic annotation /// 0016021 // integral to membrane // inferred from electronic annotation		chr15:81629982-81666497 (-) // 93.69 // q25.1
11745069_a_at	0.168665	-0.168665	-1.26342	-0.337331	1.26342	down	C5orf44	80006				chr5:64958926-64961899 (+) // 89.97 // q12.3
11748282_a_at	-0.0142179	0.0142183	1.01991	0.0284362	1.01991	up	PPP3CB	5532	0006468 // protein phosphorylation // inferred from sequence or structural similarity /// 0006470 // protein dephosphorylation // inferred from sequence or structural similarity /// 0007165 // signal transduction // non-traceable author statement /// 0007612 // learning // traceable author statement /// 0007613 // memory // traceable author statement /// 0016311 // dephosphorylation // traceable …	0005829 // cytosol // traceable author statement /// 0005886 // plasma membrane // inferred from sequence or structural similarity /// 0005955 // calcineurin complex // inferred from direct assay	0000166 // nucleotide binding // inferred from electronic annotation /// 0004721 // phosphoprotein phosphatase activity // inferred from electronic annotation /// 0004722 // protein serine/threonine phosphatase activity // non-traceable author statement /// 0005509 // calcium ion binding // inferred from direct assay /// 0005516 // calmodulin binding // inferred from direct assay /// 0005516 // c…	chr10:75196996-75226245 (-) // 98.36 // q22.2
11728165_a_at	-0.125934	0.125934	1.19075	0.251868	1.19075	up	SPINLW1 /// SPINLW1-WFDC6	100526773 /// 57119	0006508 // proteolysis // inferred from electronic annotation /// 0010466 // negative regulation of peptidase activity // inferred from electronic annotation	0005576 // extracellular region // inferred from electronic annotation	0004867 // serine-type endopeptidase inhibitor activity // inferred from electronic annotation /// 0008233 // peptidase activity // inferred from electronic annotation /// 0030414 // peptidase inhibitor activity // inferred from electronic annotation	chr20:44169549-44175016 (-) // 46.5 // q13.12
11760927_a_at	0.0190568	-0.0190568	-1.02677	-0.0381136	1.02677	down	LRCH3	84859		0005576 // extracellular region // inferred from electronic annotation		chr3:197518109-197610643 (+) // 99.4 // q29
11762829_at	-0.018888	0.018888	1.02653	0.037776	1.02653	up	LOC100506242	100506242				chr1:180138711-180139938 (+) // 98.94 // q25.2
11725481_a_at	-0.0982018	0.0982018	1.14584	0.196404	1.14584	up	CD27	939	0006915 // apoptotic process // inferred from electronic annotation /// 0006916 // anti-apoptosis // inferred from direct assay /// 0006916 // anti-apoptosis // inferred from sequence or structural similarity /// 0006916 // anti-apoptosis // inferred from electronic annotation /// 0006917 // induction of apoptosis // inferred from direct assay /// 0006917 // induction of apoptosis // inferred fro…	0005576 // extracellular region // non-traceable author statement /// 0005624 // membrane fraction // inferred from electronic annotation /// 0005887 // integral to plasma membrane // non-traceable author statement /// 0009897 // external side of plasma membrane // inferred from electronic annotation /// 0009986 // cell surface // inferred from electronic annotation /// 0016020 // membrane // inf…	0004872 // receptor activity // inferred from electronic annotation /// 0004888 // transmembrane signaling receptor activity // non-traceable author statement /// 0005515 // protein binding // inferred from physical interaction /// 0043027 // cysteine-type endopeptidase inhibitor activity involved in apoptotic process // inferred from direct assay	chr12:6554005-6560879 (+) // 98.05 // p13.31
11747748_a_at	0.0538976	-0.0538976	-1.07758	-0.107795	1.07758	down	ETV1	2115	0006351 // transcription, DNA-dependent // inferred from electronic annotation /// 0006355 // regulation of transcription, DNA-dependent // traceable author statement /// 0006355 // regulation of transcription, DNA-dependent // inferred from electronic annotation /// 0006366 // transcription from RNA polymerase II promoter // traceable author statement /// 0048935 // peripheral nervous system neu…	0005634 // nucleus // inferred from electronic annotation	0003677 // DNA binding // inferred from electronic annotation /// 0003700 // sequence-specific DNA binding transcription factor activity // inferred from electronic annotation /// 0003700 // sequence-specific DNA binding transcription factor activity // traceable author statement /// 0005515 // protein binding // inferred from physical interaction /// 0043565 // sequence-specific DNA binding // i…	chr7:13935307-14026086 (-) // 98.49 // p21.2
11753489_a_at	-0.149184	0.149184	1.22975	0.298368	1.22975	up	EED	8726	0006349 // regulation of gene expression by genetic imprinting // inferred from electronic annotation /// 0006351 // transcription, DNA-dependent // inferred from electronic annotation /// 0006355 // regulation of transcription, DNA-dependent // inferred from electronic annotation /// 0016568 // chromatin modification // inferred from electronic annotation /// 0016571 // histone methylation // in…	0001739 // sex chromatin // inferred from electronic annotation /// 0005634 // nucleus // non-traceable author statement /// 0005634 // nucleus // inferred from electronic annotation /// 0005694 // chromosome // inferred from electronic annotation /// 0035098 // ESC/E(Z) complex // inferred from direct assay /// 0035098 // ESC/E(Z) complex // inferred from electronic annotation /// 0045120 // pro…	0003682 // chromatin binding // inferred from electronic annotation /// 0005515 // protein binding // inferred from physical interaction /// 0042054 // histone methyltransferase activity // inferred from direct assay /// 0042802 // identical protein binding // inferred from physical interaction	chr11:85956265-85988054 (+) // 99.75 // q14.2
11736030_a_at	-0.133492	0.133492	1.20329	0.266983	1.20329	up	SLC16A3	9123	0006090 // pyruvate metabolic process // traceable author statement /// 0006810 // transport // inferred from electronic annotation /// 0007596 // blood coagulation // traceable author statement /// 0015711 // organic anion transport // inferred from electronic annotation /// 0015718 // monocarboxylic acid transport // traceable author statement /// 0044281 // small molecule metabolic process // …	0005624 // membrane fraction // traceable author statement /// 0005886 // plasma membrane // inferred from direct assay /// 0005886 // plasma membrane // traceable author statement /// 0005886 // plasma membrane // inferred from electronic annotation /// 0005887 // integral to plasma membrane // traceable author statement /// 0015629 // actin cytoskeleton // inferred from direct assay /// 0016020…	0008028 // monocarboxylic acid transmembrane transporter activity // traceable author statement /// 0015293 // symporter activity // inferred from electronic annotation /// 0015355 // secondary active monocarboxylate transmembrane transporter activity // inferred from electronic annotation	chr17:80193855-80197354 (+) // 93.66 // q25.3
11759273_x_at	0.080487	-0.080487	-1.11804	-0.160974	1.11804	down	HIST1H2BC /// HIST1H2BE /// HIST1H2BF /// HIST1H2BG /// HIST1H2BI	8339 /// 8343 /// 8344 /// 8346 /// 8347	0006334 // nucleosome assembly // non-traceable author statement /// 0006334 // nucleosome assembly // inferred from electronic annotation /// 0042742 // defense response to bacterium // inferred from electronic annotation	0000786 // nucleosome // non-traceable author statement /// 0000786 // nucleosome // inferred from electronic annotation /// 0005634 // nucleus // inferred from electronic annotation /// 0005694 // chromosome // inferred from electronic annotation	0003677 // DNA binding // non-traceable author statement /// 0003677 // DNA binding // inferred from electronic annotation	chr6:26273143-26273640 (+) // 100.0 // p22.2
11720863_at	-0.00257301	0.00257301	1.00357	0.00514603	1.00357	up	PNPLA4	8228	0006629 // lipid metabolic process // inferred from electronic annotation /// 0008152 // metabolic process // inferred from electronic annotation /// 0016042 // lipid catabolic process // inferred from electronic annotation		0004806 // triglyceride lipase activity // inferred from electronic annotation /// 0016787 // hydrolase activity // inferred from electronic annotation /// 0050253 // retinyl-palmitate esterase activity // inferred from electronic annotation	chrX:7866803-7895477 (-) // 83.75 // p22.31
11749228_a_at	0.0480576	-0.0480571	-1.06889	-0.0961146	1.06889	down	TMEM30A	55754	0036010 // protein localization in endosome // inferred from mutant phenotype /// 0070863 // positive regulation of protein exit from endoplasmic reticulum // inferred from direct assay	0005783 // endoplasmic reticulum // inferred from direct assay /// 0016020 // membrane // inferred from electronic annotation /// 0016021 // integral to membrane // inferred from electronic annotation	0005515 // protein binding // inferred from physical interaction	chr6:75965367-75994502 (-) // 93.61 // q14.1
11716184_s_at	0	0	-1	0	1	down	ALCAM	214	0007155 // cell adhesion // inferred from electronic annotation /// 0007155 // cell adhesion // traceable author statement /// 0007165 // signal transduction // traceable author statement /// 0007411 // axon guidance // traceable author statement /// 0007411 // axon guidance // inferred from electronic annotation /// 0008045 // motor axon guidance // inferred from electronic annotation	0009897 // external side of plasma membrane // inferred from electronic annotation /// 0016020 // membrane // inferred from electronic annotation /// 0016021 // integral to membrane // inferred from electronic annotation /// 0030424 // axon // inferred from electronic annotation /// 0043025 // neuronal cell body // inferred from electronic annotation	0005102 // receptor binding // traceable author statement	chr3:105085712-105295746 (+) // 96.66 // q13.11
11727671_a_at	-0.00571585	0.00571585	1.00796	0.0114317	1.00796	up	SYT17	51760	0006810 // transport // inferred from electronic annotation	0005802 // trans-Golgi network // inferred from electronic annotation /// 0008021 // synaptic vesicle // inferred from electronic annotation /// 0016020 // membrane // inferred from electronic annotation	0005215 // transporter activity // inferred from electronic annotation	chr16:19179534-19279656 (+) // 91.6 // p12.3
11724241_at	0.199149	-0.199149	-1.31795	-0.398298	1.31795	down	TCF4	6925	0000122 // negative regulation of transcription from RNA polymerase II promoter // inferred from electronic annotation /// 0006351 // transcription, DNA-dependent // inferred from electronic annotation /// 0006352 // transcription initiation, DNA-dependent // inferred from sequence or structural similarity /// 0006355 // regulation of transcription, DNA-dependent // inferred from electronic annot…	0005634 // nucleus // inferred from direct assay /// 0005634 // nucleus // inferred from electronic annotation /// 0005667 // transcription factor complex // inferred from sequence or structural similarity /// 0005667 // transcription factor complex // inferred from electronic annotation	0000978 // RNA polymerase II core promoter proximal region sequence-specific DNA binding // inferred from sequence or structural similarity /// 0001011 // sequence-specific DNA binding RNA polymerase recruiting transcription factor activity // inferred from sequence or structural similarity /// 0001077 // RNA polymerase II core promoter proximal region sequence-specific DNA binding transcription …	chr18:52889564-53255860 (-) // 95.08 // q21.2
11741178_a_at	0.149337	-0.149337	-1.23001	-0.298674	1.23001	down	UPB1	51733	0006206 // pyrimidine base metabolic process // traceable author statement /// 0006807 // nitrogen compound metabolic process // inferred from electronic annotation /// 0008152 // metabolic process // inferred from electronic annotation /// 0019483 // beta-alanine biosynthetic process // inferred from electronic annotation /// 0044281 // small molecule metabolic process // traceable author statem…	0005737 // cytoplasm // inferred from electronic annotation /// 0005829 // cytosol // traceable author statement	0003824 // catalytic activity // inferred from electronic annotation /// 0003837 // beta-ureidopropionase activity // not recorded /// 0003837 // beta-ureidopropionase activity // inferred from electronic annotation /// 0003837 // beta-ureidopropionase activity // traceable author statement /// 0016787 // hydrolase activity // inferred from electronic annotation /// 0016810 // hydrolase activity,…	chr22:24891114-24922552 (+) // 71.56 // q11.23
11746802_x_at	0.0542269	-0.0542269	-1.07807	-0.108454	1.07807	down	BNIP3L	665	0006915 // apoptotic process // inferred from electronic annotation /// 0006917 // induction of apoptosis // inferred from direct assay /// 0006917 // induction of apoptosis // inferred from electronic annotation /// 0008634 // negative regulation of survival gene product expression // inferred from direct assay /// 0035694 // mitochondrial protein catabolic process // inferred from mutant phenot…	0005634 // nucleus // inferred from electronic annotation /// 0005635 // nuclear envelope // inferred from direct assay /// 0005635 // nuclear envelope // inferred from electronic annotation /// 0005739 // mitochondrion // inferred from direct assay /// 0005739 // mitochondrion // inferred from electronic annotation /// 0005740 // mitochondrial envelope // inferred from electronic annotation /// …	0005515 // protein binding // inferred from physical interaction /// 0005521 // lamin binding // inferred from direct assay /// 0005521 // lamin binding // inferred from physical interaction /// 0042802 // identical protein binding // inferred from physical interaction /// 0042802 // identical protein binding // inferred from electronic annotation /// 0042803 // protein homodimerization activity …	chr8:26240552-26268534 (+) // 98.94 // p21.2
11732426_a_at	-0.0644042	0.0644042	1.09339	0.128808	1.09339	up	GNA14	9630	0006184 // GTP catabolic process // traceable author statement /// 0006471 // protein ADP-ribosylation // inferred from electronic annotation /// 0007165 // signal transduction // non-traceable author statement /// 0007165 // signal transduction // inferred from electronic annotation /// 0007165 // signal transduction // traceable author statement /// 0007186 // G-protein coupled receptor signali…	0005834 // heterotrimeric G-protein complex // not recorded /// 0005834 // heterotrimeric G-protein complex // traceable author statement /// 0005886 // plasma membrane // traceable author statement /// 0031234 // extrinsic to internal side of plasma membrane // not recorded	0000166 // nucleotide binding // inferred from electronic annotation /// 0001664 // G-protein coupled receptor binding // not recorded /// 0003924 // GTPase activity // traceable author statement /// 0004871 // signal transducer activity // not recorded /// 0004871 // signal transducer activity // inferred from electronic annotation /// 0004871 // signal transducer activity // non-traceable autho…	chr9:80037512-80263664 (-) // 98.65 // q21.2
11745158_x_at	-0.175489	0.175489	1.27543	0.350979	1.27543	up	MUC1	4582	0006916 // anti-apoptosis // inferred from direct assay /// 0006977 // DNA damage response, signal transduction by p53 class mediator resulting in cell cycle arrest // inferred from direct assay /// 0006978 // DNA damage response, signal transduction by p53 class mediator resulting in transcription of p21 class mediator // inferred from direct assay /// 0010944 // negative regulation of transcrip…	0000790 // nuclear chromatin // inferred from direct assay /// 0005576 // extracellular region // inferred from electronic annotation /// 0005634 // nucleus // inferred from electronic annotation /// 0005737 // cytoplasm // not recorded /// 0005737 // cytoplasm // inferred from electronic annotation /// 0005796 // Golgi lumen // traceable author statement /// 0005886 // plasma membrane // inferre…	0000978 // RNA polymerase II core promoter proximal region sequence-specific DNA binding // inferred from direct assay /// 0002039 // p53 binding // inferred from physical interaction /// 0003712 // transcription cofactor activity // inferred from direct assay /// 0005515 // protein binding // inferred from physical interaction	chr1:155158423-155162684 (-) // 100.0 // q22
11722098_a_at	-0.065074	0.065074	1.09441	0.130148	1.09441	up	RICTOR	253260	0007173 // epidermal growth factor receptor signaling pathway // traceable author statement /// 0007275 // multicellular organismal development // inferred from electronic annotation /// 0008543 // fibroblast growth factor receptor signaling pathway // traceable author statement /// 0009790 // embryo development // inferred from sequence or structural similarity /// 0009790 // embryo development …	0005829 // cytosol // traceable author statement /// 0031932 // TORC2 complex // inferred from direct assay /// 0031932 // TORC2 complex // inferred from electronic annotation	0005515 // protein binding // inferred from physical interaction /// 0043022 // ribosome binding // inferred from electronic annotation	chr5:38938021-39074503 (-) // 97.8 // p13.1
11761794_x_at	-0.0560722	0.0560722	1.08083	0.112144	1.08083	up	FAM122C	159091				chrX:133941299-133955985 (+) // 83.02 // q26.3
11732234_a_at	-0.113275	0.113275	1.17003	0.22655	1.17003	up	RND1	27289	0006184 // GTP catabolic process // non-traceable author statement /// 0007015 // actin filament organization // inferred from direct assay /// 0007162 // negative regulation of cell adhesion // inferred from direct assay /// 0007264 // small GTPase mediated signal transduction // inferred from electronic annotation /// 0007411 // axon guidance // traceable author statement /// 0016322 // neuron …	0005622 // intracellular // inferred from electronic annotation /// 0005737 // cytoplasm // inferred from electronic annotation /// 0005829 // cytosol // traceable author statement /// 0005856 // cytoskeleton // inferred from electronic annotation /// 0005886 // plasma membrane // inferred from electronic annotation /// 0005912 // adherens junction // inferred from direct assay /// 0016020 // mem…	0000166 // nucleotide binding // inferred from electronic annotation /// 0003924 // GTPase activity // non-traceable author statement /// 0005102 // receptor binding // inferred from physical interaction /// 0005515 // protein binding // inferred from physical interaction /// 0005525 // GTP binding // inferred from electronic annotation	chr12:49250931-49259681 (-) // 97.96 // q13.12
11717396_a_at	-0.00465584	0.00465584	1.00648	0.00931168	1.00648	up	CHTF8	54921	0006260 // DNA replication // inferred from electronic annotation /// 0007049 // cell cycle // inferred from electronic annotation	0005634 // nucleus // inferred from electronic annotation	0003677 // DNA binding // inferred from electronic annotation	chr16:68973480-69155398 (-) // 95.1 // q22.1
11731720_at	-0.0352888	0.0352888	1.05014	0.0705776	1.05014	up	LURAP1	541468	0001819 // positive regulation of cytokine production // inferred from direct assay /// 0043123 // positive regulation of I-kappaB kinase/NF-kappaB cascade // inferred from direct assay	0005737 // cytoplasm // inferred from direct assay /// 0005737 // cytoplasm // inferred from electronic annotation		chr1:46669005-46687158 (+) // 83.24 // p34.1
11759378_at	-0.125063	0.125063	1.18931	0.250126	1.18931	up	NHSL2	340527				chrX:71353497-71361212 (+) // 99.3 // q13.1
11728541_s_at	-0.108515	0.108515	1.16234	0.217031	1.16234	up	MDGA1	266727	0001764 // neuron migration // inferred from sequence or structural similarity /// 0007275 // multicellular organismal development // inferred from electronic annotation /// 0007399 // nervous system development // inferred from electronic annotation /// 0007420 // brain development // inferred from sequence or structural similarity /// 0007420 // brain development // inferred from electronic ann…	0005886 // plasma membrane // inferred from electronic annotation /// 0016020 // membrane // inferred from electronic annotation /// 0031225 // anchored to membrane // inferred from electronic annotation /// 0046658 // anchored to plasma membrane // inferred from direct assay /// 0046658 // anchored to plasma membrane // inferred from sequence or structural similarity /// 0046658 // anchored to p…		chr6:37600292-37665766 (-) // 93.0 // p21.2
11741765_a_at	0.00221848	-0.00221848	-1.00308	-0.00443697	1.00308	down	METTL20	254013	0006479 // protein methylation // inferred from electronic annotation /// 0032259 // methylation // inferred from electronic annotation	0005737 // cytoplasm // inferred from electronic annotation	0008168 // methyltransferase activity // inferred from electronic annotation /// 0008276 // protein methyltransferase activity // inferred from electronic annotation /// 0016740 // transferase activity // inferred from electronic annotation	chr12:31800090-31821817 (+) // 67.24 // p11.21
11720384_at	0.00356483	-0.00356483	-1.00495	-0.00712967	1.00495	down	STX6	10228	0006810 // transport // inferred from electronic annotation /// 0006886 // intracellular protein transport // inferred from electronic annotation /// 0006906 // vesicle fusion // inferred from physical interaction /// 0007032 // endosome organization // inferred from electronic annotation /// 0015031 // protein transport // inferred from electronic annotation /// 0016192 // vesicle-mediated trans…	0000139 // Golgi membrane // inferred from electronic annotation /// 0005624 // membrane fraction // inferred from electronic annotation /// 0005769 // early endosome // inferred from direct assay /// 0005794 // Golgi apparatus // inferred from direct assay /// 0005794 // Golgi apparatus // inferred from electronic annotation /// 0005802 // trans-Golgi network // inferred from electronic annotati…	0005484 // SNAP receptor activity // inferred from electronic annotation /// 0005515 // protein binding // inferred from physical interaction	chr1:180941851-180992257 (-) // 97.46 // q25.3
11730642_at	0.164991	-0.164991	-1.257	-0.329981	1.257	down	CXorf48	54967				chrX:134290460-134305751 (-) // 86.07 // q26.3
11717826_x_at	0	0	-1	0	1	down	STMN2	11075	0007026 // negative regulation of microtubule depolymerization // inferred from direct assay /// 0010976 // positive regulation of neuron projection development // inferred from direct assay /// 0010977 // negative regulation of neuron projection development // inferred from direct assay /// 0030182 // neuron differentiation // non-traceable author statement /// 0031115 // negative regulation of …	0005622 // intracellular // inferred from electronic annotation /// 0005737 // cytoplasm // inferred from electronic annotation /// 0005768 // endosome // inferred from electronic annotation /// 0005794 // Golgi apparatus // inferred from electronic annotation /// 0016020 // membrane // inferred from electronic annotation /// 0030424 // axon // inferred from electronic annotation /// 0030426 // g…	0005515 // protein binding // inferred from physical interaction	chr8:80523048-80578397 (+) // 92.49 // q21.13
11759396_a_at	-0.0422683	0.0422683	1.06035	0.0845366	1.06035	up	BTN2A3P	54718		0016021 // integral to membrane // inferred from electronic annotation		chr6:26422346-26431843 (+) // 100.0 // p22.2
11718709_a_at	-0.0246172	0.0246172	1.03472	0.0492344	1.03472	up	TBC1D9B	23061	0032313 // regulation of Rab GTPase activity // inferred from electronic annotation /// 0032851 // positive regulation of Rab GTPase activity // inferred from electronic annotation /// 0043547 // positive regulation of GTPase activity // inferred from electronic annotation	0005622 // intracellular // inferred from electronic annotation /// 0016020 // membrane // inferred from electronic annotation /// 0016021 // integral to membrane // inferred from electronic annotation	0005096 // GTPase activator activity // inferred from electronic annotation /// 0005097 // Rab GTPase activator activity // inferred from electronic annotation /// 0005509 // calcium ion binding // inferred from electronic annotation	chr5:179289065-179334881 (-) // 94.81 // q35.3
11756889_s_at	0.0369658	-0.0369658	-1.05258	-0.0739317	1.05258	down	SNAP91	9892	0007163 // establishment or maintenance of cell polarity // inferred from electronic annotation /// 0007409 // axonogenesis // inferred from electronic annotation /// 0030100 // regulation of endocytosis // inferred from electronic annotation /// 0048268 // clathrin coat assembly // inferred from electronic annotation /// 0051223 // regulation of protein transport // inferred from electronic anno…	0005886 // plasma membrane // inferred from electronic annotation /// 0005905 // coated pit // inferred from electronic annotation /// 0008021 // synaptic vesicle // inferred from electronic annotation /// 0014069 // postsynaptic density // inferred from electronic annotation /// 0016020 // membrane // inferred from electronic annotation /// 0030118 // clathrin coat // inferred from electronic an…	0005543 // phospholipid binding // inferred from electronic annotation /// 0005545 // 1-phosphatidylinositol binding // inferred from electronic annotation /// 0030276 // clathrin binding // inferred from electronic annotation	chr6:84262619-84417677 (-) // 91.64 // q14.2
11733207_a_at	-0.136087	0.136087	1.20763	0.272174	1.20763	up	ZNF480	147657	0006351 // transcription, DNA-dependent // inferred from electronic annotation /// 0006355 // regulation of transcription, DNA-dependent // inferred from electronic annotation	0005622 // intracellular // inferred from electronic annotation /// 0005634 // nucleus // inferred from direct assay /// 0005634 // nucleus // inferred from electronic annotation /// 0005730 // nucleolus // inferred from direct assay /// 0005737 // cytoplasm // inferred from direct assay	0003676 // nucleic acid binding // inferred from electronic annotation /// 0008270 // zinc ion binding // inferred from electronic annotation /// 0046872 // metal ion binding // inferred from electronic annotation	chr19:52800420-52826572 (+) // 39.83 // q13.41
11719541_a_at	0.0185671	-0.0185671	-1.02607	-0.0371342	1.02607	down	GCFC1	94104	0006351 // transcription, DNA-dependent // inferred from electronic annotation /// 0006355 // regulation of transcription, DNA-dependent // non-traceable author statement /// 0006355 // regulation of transcription, DNA-dependent // inferred from electronic annotation	0005634 // nucleus // inferred from electronic annotation /// 0005829 // cytosol // inferred from direct assay	0003677 // DNA binding // non-traceable author statement /// 0003677 // DNA binding // inferred from electronic annotation /// 0003700 // sequence-specific DNA binding transcription factor activity // inferred from electronic annotation	chr21:34106209-34144173 (-) // 98.03 // q22.11
11755665_x_at	-0.19768	0.19768	1.31527	0.39536	1.31527	up	VARS2	57176	0006412 // translation // inferred from electronic annotation /// 0006418 // tRNA aminoacylation for protein translation // traceable author statement /// 0006418 // tRNA aminoacylation for protein translation // inferred from electronic annotation /// 0006438 // valyl-tRNA aminoacylation // inferred from electronic annotation /// 0006450 // regulation of translational fidelity // inferred from e…	0005737 // cytoplasm // inferred from electronic annotation /// 0005739 // mitochondrion // inferred from electronic annotation	0000166 // nucleotide binding // inferred from electronic annotation /// 0002161 // aminoacyl-tRNA editing activity // inferred from electronic annotation /// 0004812 // aminoacyl-tRNA ligase activity // inferred from electronic annotation /// 0004832 // valine-tRNA ligase activity // inferred from electronic annotation /// 0005524 // ATP binding // inferred from electronic annotation /// 0016874…	chr6:30886338-30894233 (+) // 92.82 // p21.33
11728246_at	0.0298419	-0.0298419	-1.04224	-0.0596838	1.04224	down	FAM134A	79137		0005783 // endoplasmic reticulum // inferred from electronic annotation /// 0016020 // membrane // inferred from electronic annotation /// 0016021 // integral to membrane // inferred from electronic annotation		chr2:220042938-220050201 (+) // 79.33 // q35
11745944_s_at	-0.0101185	0.0101185	1.01413	0.020237	1.01413	up	CHPF	79586		0005794 // Golgi apparatus // inferred from electronic annotation /// 0016020 // membrane // inferred from electronic annotation /// 0016021 // integral to membrane // inferred from electronic annotation /// 0032580 // Golgi cisterna membrane // inferred from electronic annotation	0016740 // transferase activity // inferred from electronic annotation /// 0016758 // transferase activity, transferring hexosyl groups // inferred from electronic annotation /// 0046872 // metal ion binding // inferred from electronic annotation /// 0047238 // glucuronosyl-N-acetylgalactosaminyl-proteoglycan 4-beta-N-acetylgalactosaminyltransferase activity // inferred from electronic annotation…	chr2:220404093-220407819 (-) // 99.64 // q35
11740999_a_at	-0.115348	0.115348	1.1734	0.230697	1.1734	up	GAP43	2596	0007205 // protein kinase C-activating G-protein coupled receptor signaling pathway // traceable author statement /// 0007275 // multicellular organismal development // inferred from electronic annotation /// 0007399 // nervous system development // inferred from electronic annotation /// 0009611 // response to wounding // traceable author statement /// 0030154 // cell differentiation // inferred…	0005886 // plasma membrane // inferred from direct assay /// 0005886 // plasma membrane // inferred from electronic annotation /// 0016020 // membrane // inferred from electronic annotation /// 0030054 // cell junction // inferred from electronic annotation /// 0031527 // filopodium membrane // inferred from direct assay /// 0031527 // filopodium membrane // inferred from electronic annotation //…	0005515 // protein binding // inferred from physical interaction /// 0005516 // calmodulin binding // inferred from electronic annotation	chr3:115342150-115440334 (+) // 75.53 // q13.31
11742455_a_at	-0.0334258	0.0334256	1.04743	0.0668514	1.04743	up	DPF3	8110	0006351 // transcription, DNA-dependent // inferred from electronic annotation /// 0006355 // regulation of transcription, DNA-dependent // inferred from electronic annotation /// 0007399 // nervous system development // inferred from electronic annotation /// 0016568 // chromatin modification // inferred from electronic annotation	0005622 // intracellular // inferred from electronic annotation /// 0005634 // nucleus // non-traceable author statement /// 0005634 // nucleus // inferred from electronic annotation /// 0071565 // nBAF complex // inferred from sequence or structural similarity	0003676 // nucleic acid binding // inferred from electronic annotation /// 0008270 // zinc ion binding // non-traceable author statement /// 0008270 // zinc ion binding // inferred from electronic annotation /// 0046872 // metal ion binding // inferred from electronic annotation	chr14:73136659-73360809 (-) // 98.94 // q24.2
11718635_at	-0.118122	0.118122	1.17792	0.236244	1.17792	up	KIF1B	23095	0006200 // ATP catabolic process // inferred from sequence or structural similarity /// 0006200 // ATP catabolic process // inferred from electronic annotation /// 0006915 // apoptotic process // inferred from electronic annotation /// 0007018 // microtubule-based movement // inferred from sequence or structural similarity /// 0007018 // microtubule-based movement // inferred from electronic anno…	0005737 // cytoplasm // inferred from electronic annotation /// 0005739 // mitochondrion // inferred from electronic annotation /// 0005856 // cytoskeleton // inferred from electronic annotation /// 0005874 // microtubule // inferred from electronic annotation /// 0005875 // microtubule associated complex // inferred from sequence or structural similarity /// 0005875 // microtubule associated com…	0000166 // nucleotide binding // inferred from electronic annotation /// 0003777 // microtubule motor activity // inferred from sequence or structural similarity /// 0003777 // microtubule motor activity // inferred from electronic annotation /// 0005515 // protein binding // inferred from physical interaction /// 0005524 // ATP binding // inferred from electronic annotation /// 0005543 // phosph…	chr1:10270763-10368652 (+) // 90.43 // p36.22
11738079_at	0.00932598	-0.00932598	-1.01301	-0.018652	1.01301	down	NR2E3	10002	0006351 // transcription, DNA-dependent // inferred from electronic annotation /// 0006355 // regulation of transcription, DNA-dependent // inferred from electronic annotation /// 0006366 // transcription from RNA polymerase II promoter // traceable author statement /// 0006367 // transcription initiation from RNA polymerase II promoter // traceable author statement /// 0007165 // signal transduc…	0005634 // nucleus // traceable author statement /// 0005634 // nucleus // inferred from electronic annotation /// 0005654 // nucleoplasm // traceable author statement	0003677 // DNA binding // inferred from electronic annotation /// 0003700 // sequence-specific DNA binding transcription factor activity // inferred from electronic annotation /// 0003707 // steroid hormone receptor activity // inferred from electronic annotation /// 0004872 // receptor activity // inferred from electronic annotation /// 0004879 // ligand-activated sequence-specific DNA binding R…	chr15:72102885-72107270 (+) // 88.82 // q23
11725327_a_at	0.11316	-0.11316	-1.16985	-0.22632	1.16985	down	CAMK2D	817	0001558 // regulation of cell growth // non-traceable author statement /// 0006468 // protein phosphorylation // inferred from direct assay /// 0006468 // protein phosphorylation // non-traceable author statement /// 0006468 // protein phosphorylation // inferred from electronic annotation /// 0007268 // synaptic transmission // traceable author statement /// 0008016 // regulation of heart contra…	0005654 // nucleoplasm // traceable author statement /// 0005829 // cytosol // traceable author statement /// 0005886 // plasma membrane // traceable author statement /// 0005886 // plasma membrane // inferred from electronic annotation /// 0005954 // calcium- and calmodulin-dependent protein kinase complex // traceable author statement /// 0016020 // membrane // inferred from electronic annotati…	0000166 // nucleotide binding // inferred from electronic annotation /// 0004672 // protein kinase activity // inferred from electronic annotation /// 0004674 // protein serine/threonine kinase activity // inferred from electronic annotation /// 0004683 // calmodulin-dependent protein kinase activity // inferred from electronic annotation /// 0005516 // calmodulin binding // inferred from electro…	chr4:114372189-114683202 (-) // 84.34 // q26
11734301_at	-0.0822978	0.0822978	1.12085	0.164596	1.12085	up	MBL2	4153	0001867 // complement activation, lectin pathway // inferred from direct assay /// 0001867 // complement activation, lectin pathway // inferred from physical interaction /// 0001867 // complement activation, lectin pathway // traceable author statement /// 0001867 // complement activation, lectin pathway // inferred from electronic annotation /// 0006953 // acute-phase response // traceable autho…	0005576 // extracellular region // traceable author statement /// 0005576 // extracellular region // inferred from electronic annotation /// 0005581 // collagen // inferred from electronic annotation /// 0005615 // extracellular space // inferred from electronic annotation /// 0005615 // extracellular space // traceable author statement	0005102 // receptor binding // inferred from physical interaction /// 0005515 // protein binding // inferred from physical interaction /// 0005537 // mannose binding // non-traceable author statement /// 0005537 // mannose binding // traceable author statement /// 0005537 // mannose binding // inferred from electronic annotation /// 0030246 // carbohydrate binding // inferred from electronic anno…	chr10:54526872-54531460 (-) // 30.64 // q21.1
11733687_s_at	0.126136	-0.126135	-1.19108	-0.252271	1.19108	down	STRA6	64220	0001568 // blood vessel development // inferred from mutant phenotype /// 0001822 // kidney development // inferred from mutant phenotype /// 0003184 // pulmonary valve morphogenesis // inferred from mutant phenotype /// 0003281 // ventricular septum development // inferred from mutant phenotype /// 0006810 // transport // inferred from electronic annotation /// 0007507 // heart development // in…	0005886 // plasma membrane // inferred from electronic annotation /// 0016020 // membrane // inferred from electronic annotation /// 0016021 // integral to membrane // inferred from electronic annotation /// 0043234 // protein complex // inferred from direct assay	0004872 // receptor activity // inferred from electronic annotation	chr15:74471809-74501371 (-) // 98.94 // q24.1
11753634_a_at	0.0977349	-0.0977349	-1.1451	-0.19547	1.1451	down	MED24	9862	0006351 // transcription, DNA-dependent // inferred from electronic annotation /// 0006355 // regulation of transcription, DNA-dependent // non-traceable author statement /// 0006355 // regulation of transcription, DNA-dependent // inferred from electronic annotation /// 0006366 // transcription from RNA polymerase II promoter // inferred from electronic annotation /// 0006367 // transcription in…	0005634 // nucleus // inferred from direct assay /// 0005634 // nucleus // inferred from electronic annotation /// 0005654 // nucleoplasm // traceable author statement /// 0016592 // mediator complex // non-traceable author statement /// 0016592 // mediator complex // inferred from electronic annotation	0001104 // RNA polymerase II transcription cofactor activity // inferred from direct assay /// 0003712 // transcription cofactor activity // inferred from direct assay /// 0003713 // transcription coactivator activity // inferred from electronic annotation /// 0004402 // histone acetyltransferase activity // inferred from electronic annotation /// 0004872 // receptor activity // inferred from dir…	chr17:38175381-38209868 (-) // 91.84 // q21.1
11749610_a_at	0.101845	-0.101844	-1.15164	-0.203689	1.15164	down	CD58	965	0007155 // cell adhesion // non-traceable author statement /// 0007596 // blood coagulation // traceable author statement /// 0016337 // cell-cell adhesion // non-traceable author statement /// 0050900 // leukocyte migration // traceable author statement	0005886 // plasma membrane // traceable author statement /// 0005886 // plasma membrane // inferred from electronic annotation /// 0005887 // integral to plasma membrane // non-traceable author statement /// 0016020 // membrane // inferred from electronic annotation /// 0016021 // integral to membrane // inferred from electronic annotation /// 0031225 // anchored to membrane // inferred from elec…	0005515 // protein binding // inferred from physical interaction	chr1:117064059-117113661 (-) // 97.12 // p13.1
[truncated: 48,919 more rows]

## Sheet: Diff Genes Number
NO	Comparison	Up-regulated	Down-regulated
[truncated: 1 more rows]

## Sheet: Differential Data
Probe	NC	MIR-593-5P	Fold change	Fold change	Fold change	Fold change	Annotation	Annotation	Annotation	Annotation	Annotation	Annotation
[truncated: 476 more rows]

[truncated: 4 more sheets: Diff Data(UP), Diff Data(Down), Raw_Data, ReadMe]
